# Supplementary material for: Protein–DNA binding dynamics predict transcriptional response to nutrients in archaea
Source: PubMed Central journal article supplement (PMC3794607; doi:10.1093/nar/gkt659), 2013-07-26

## Supplementary Figure 1

Supplementary Figure 1. ODE model fit to NanoString gene expression data in response to glucose  $\Deltaura3$  (parent strain) and  $\Deltaura3\Delta trmB$  mutant background for all 100 genes in the dataset. Black lines represent mRNA level in the  $\Deltaura3$  strain. Red lines represent mRNA level in the  $\Deltaura3\Delta trmB$  strain. The grey line and the dotted orange line show model fits for  $\Deltaura3$  and  $\Deltaura3\Delta trmB$  respectively. Error bars are standard error from the average of 2 biological replicates of the gene expression data. Title color matches the  $\Deltaura3$  clusters in Figure 4.

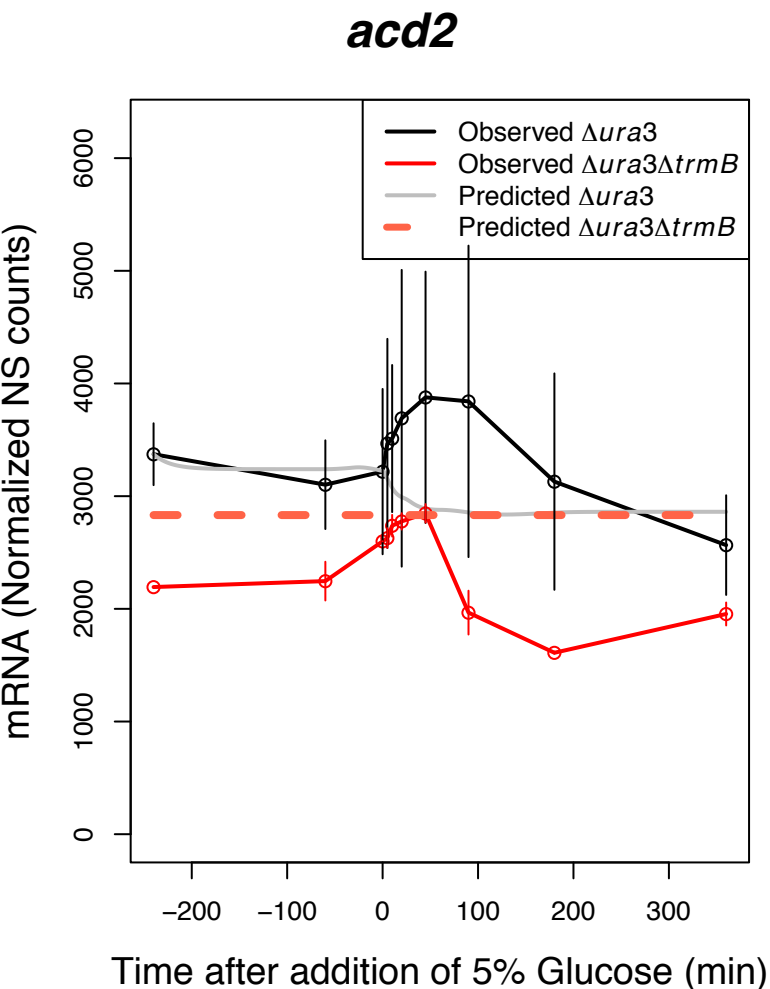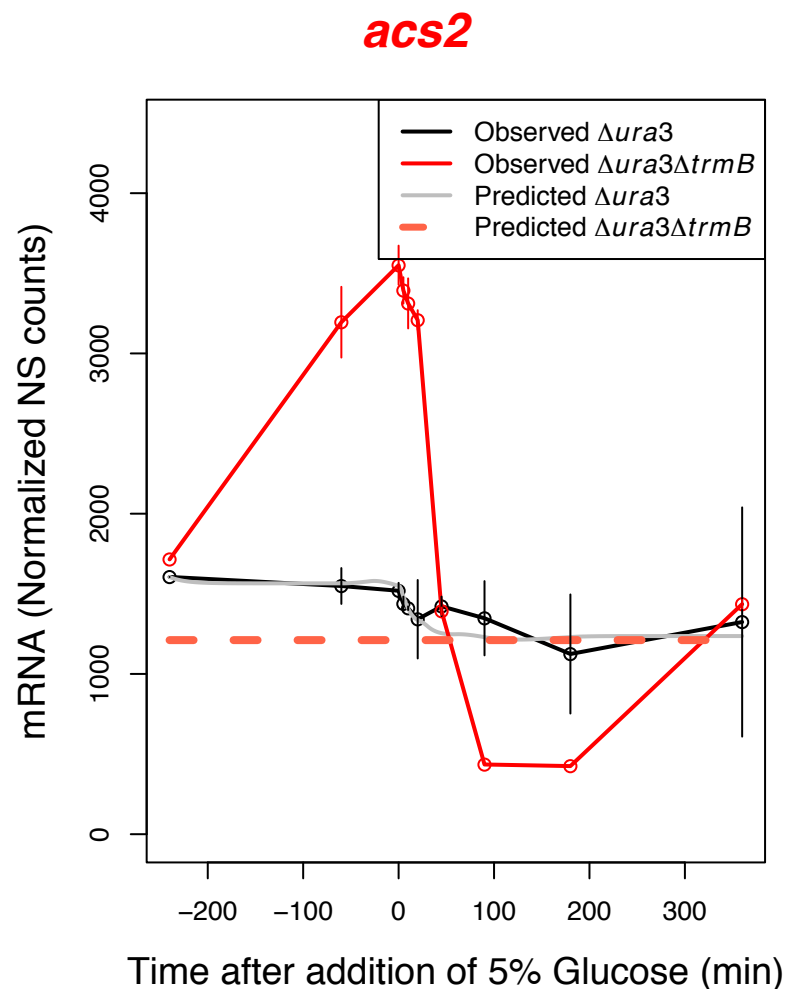

### *acs3*

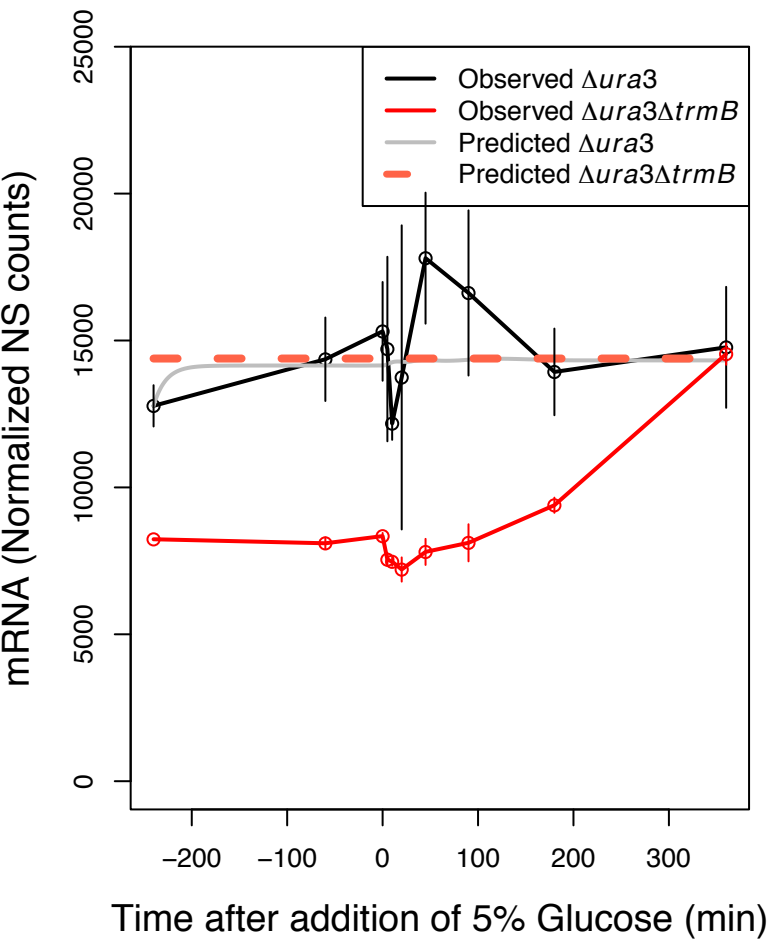

### *aldY2*

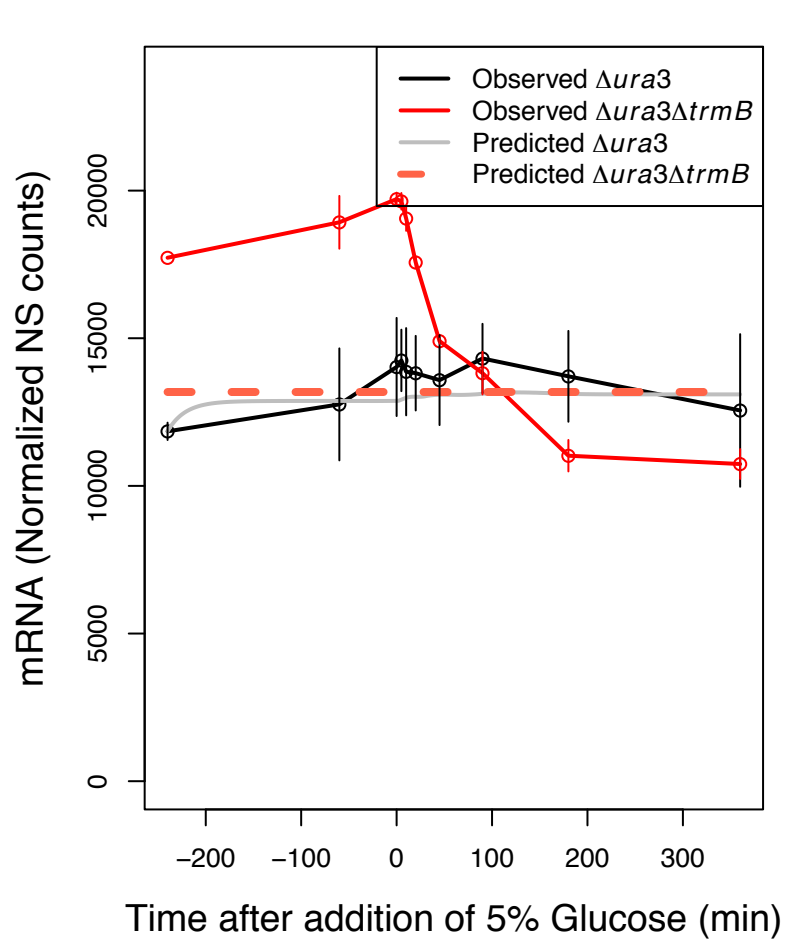

### *argG*

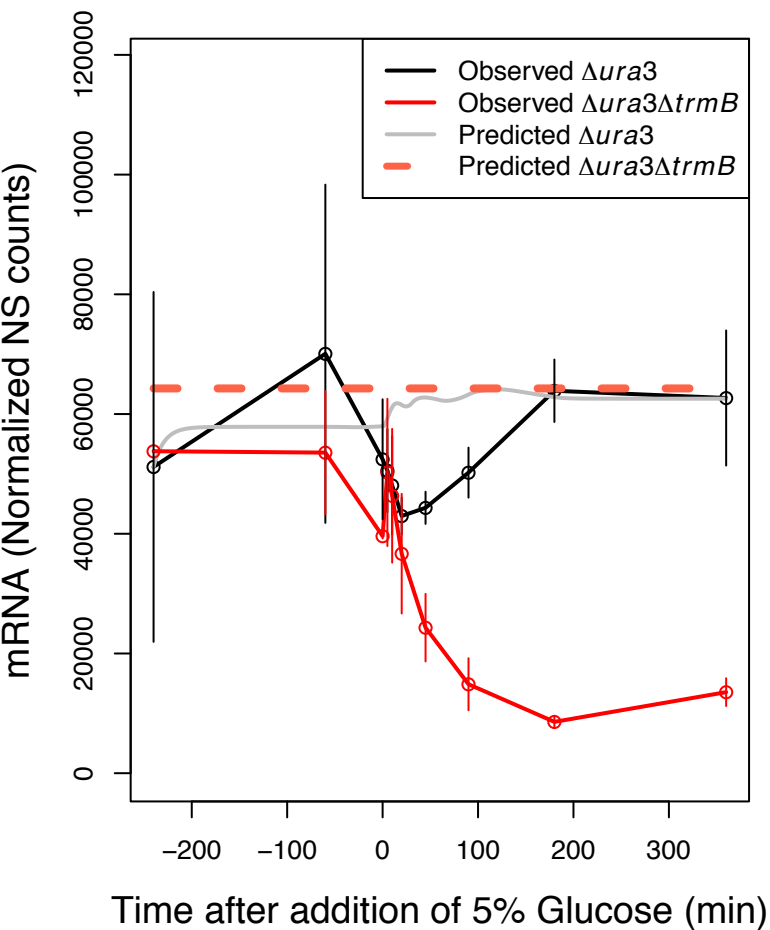

### *argH*

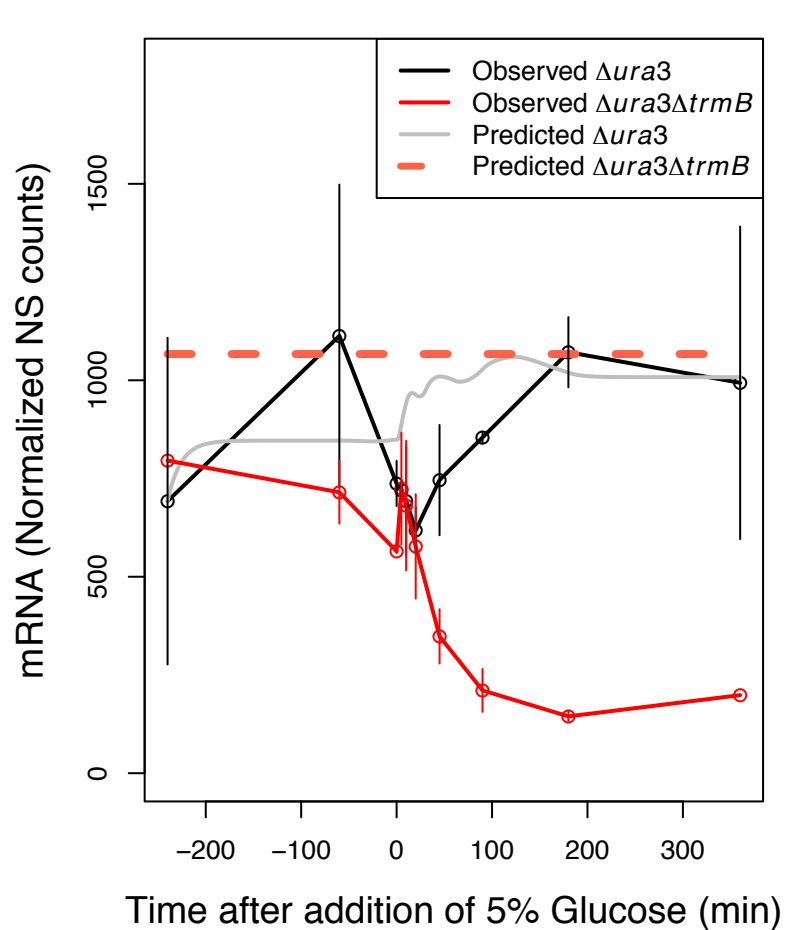

### *aroC*

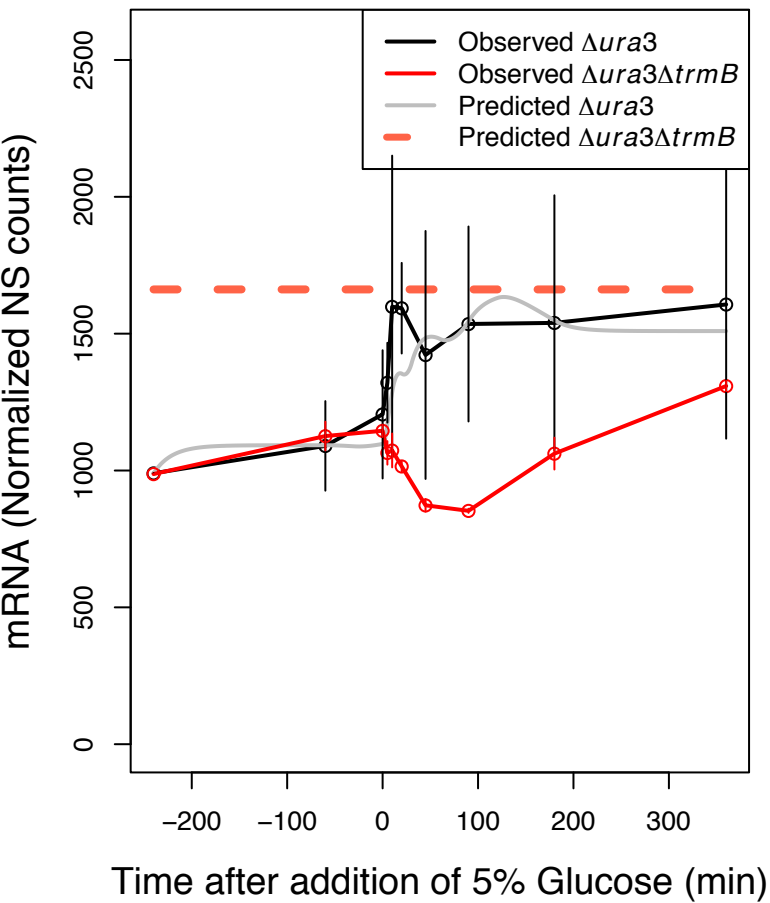

### *aroE*

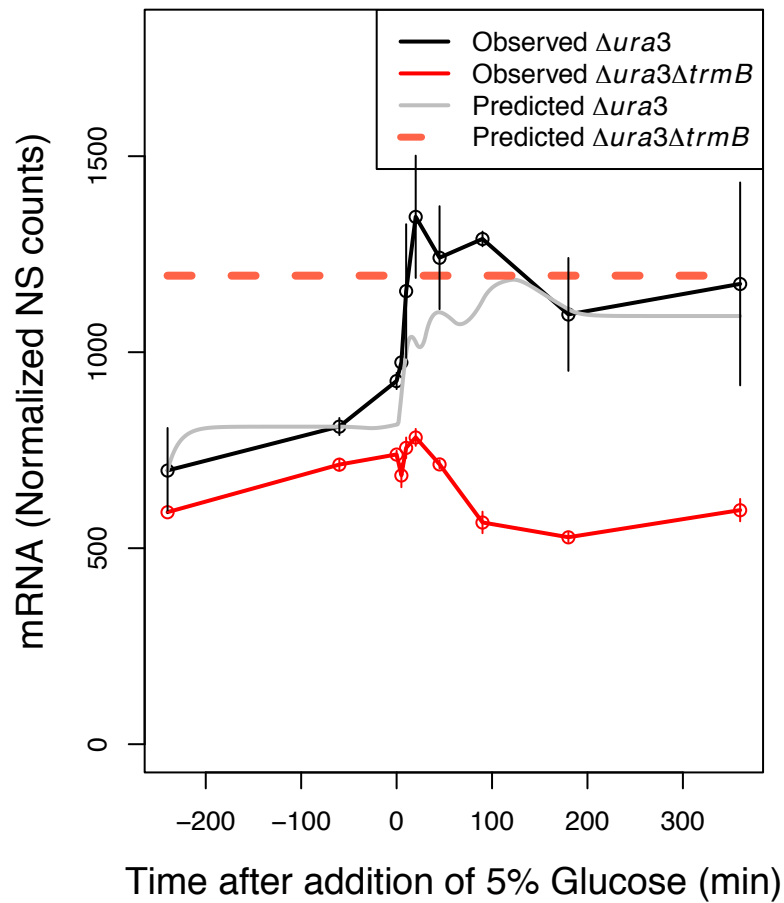

### *asnA*

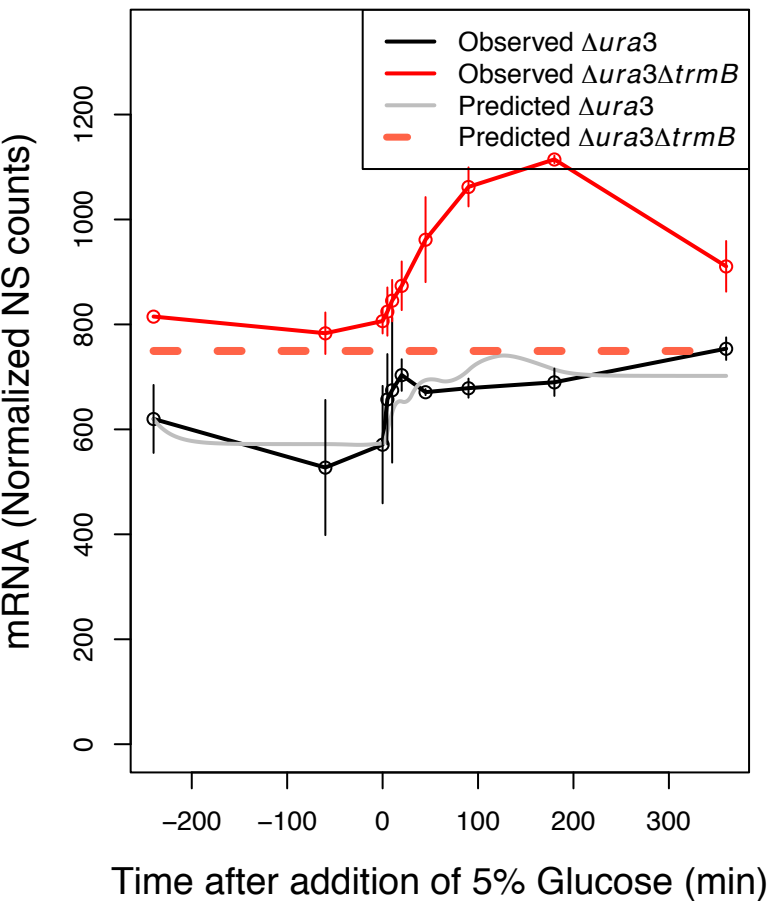

### *aspC2*

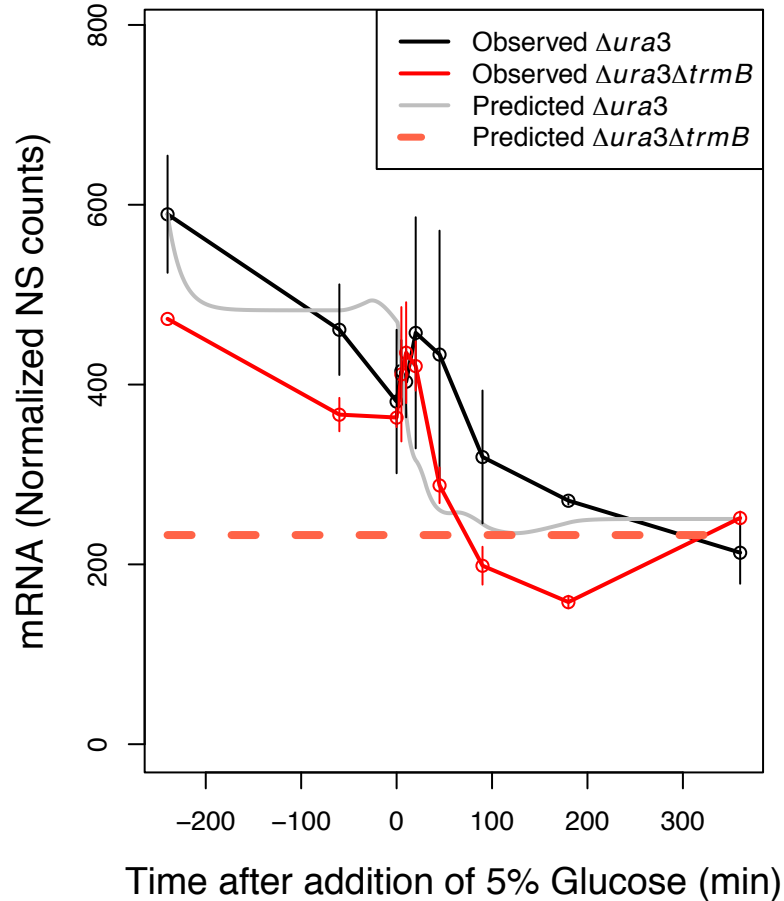

### *can*

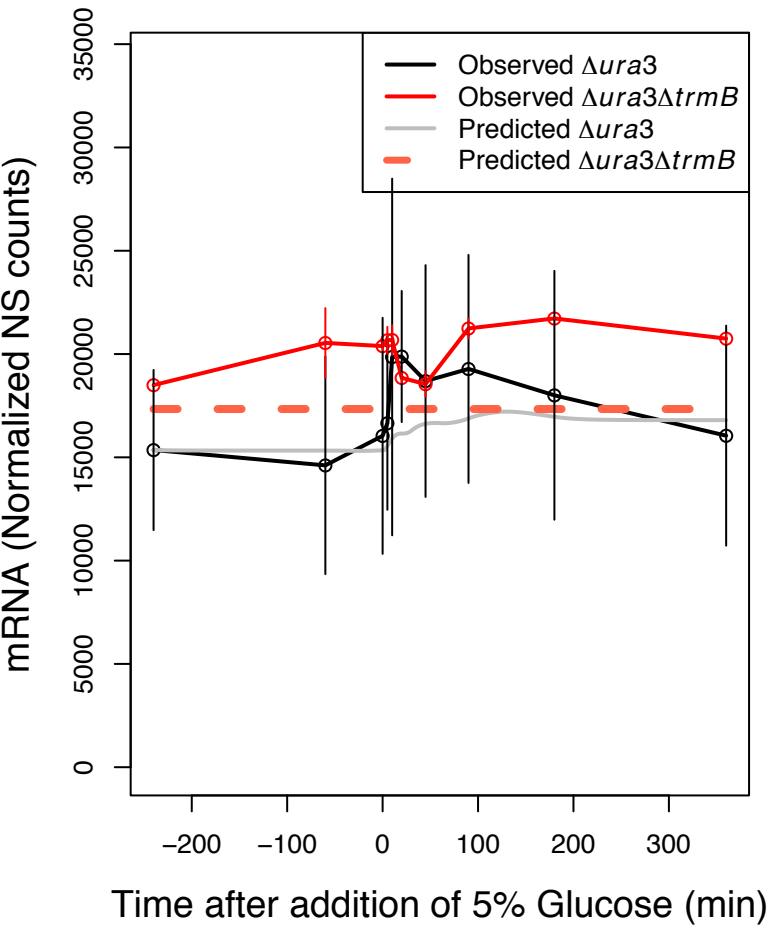

### *carA*

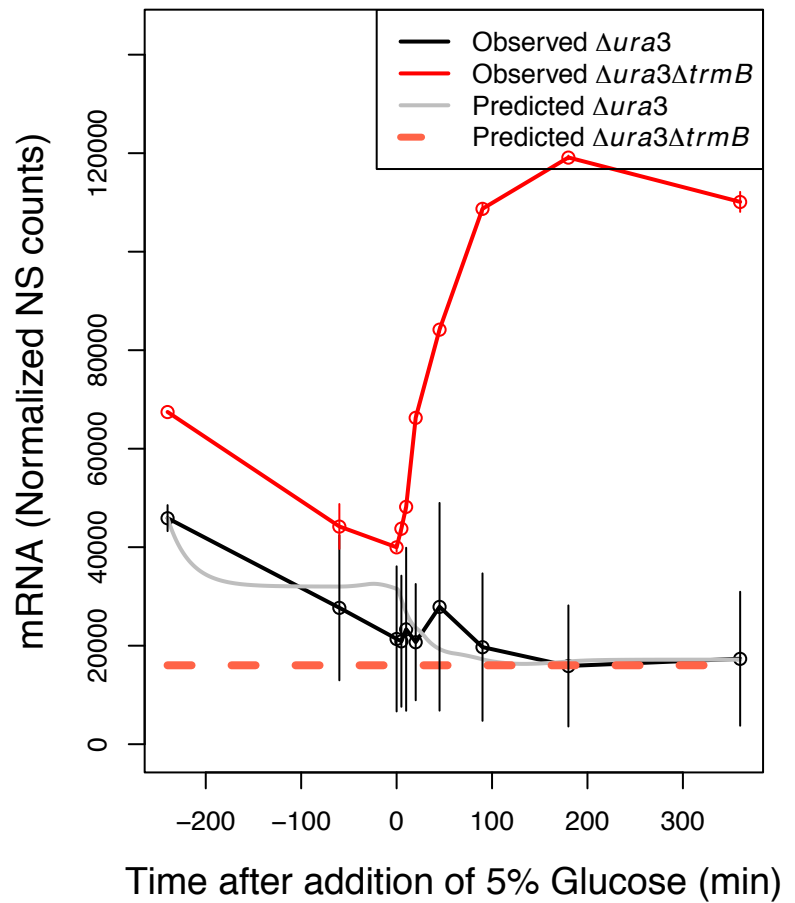

### *carB*

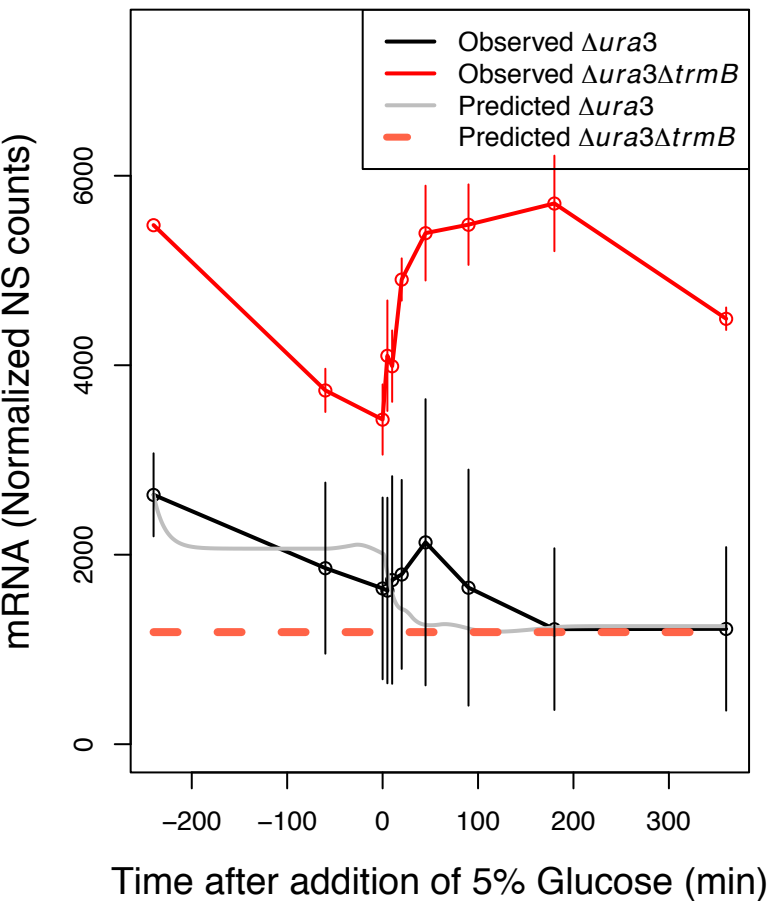

### *cbiC*

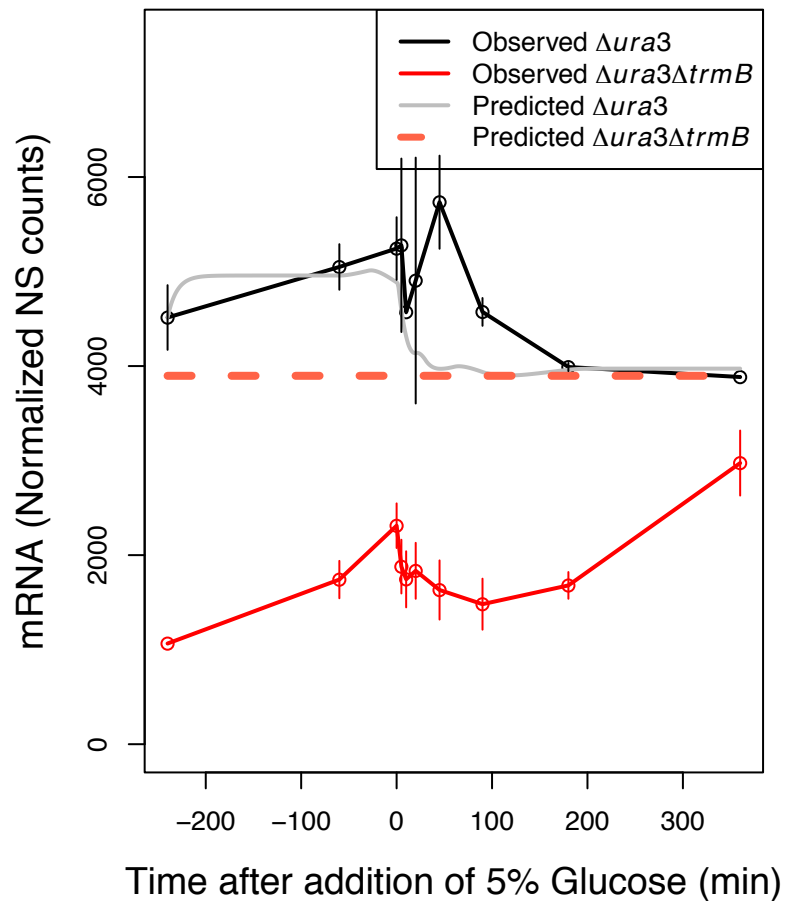

### *cbiF*

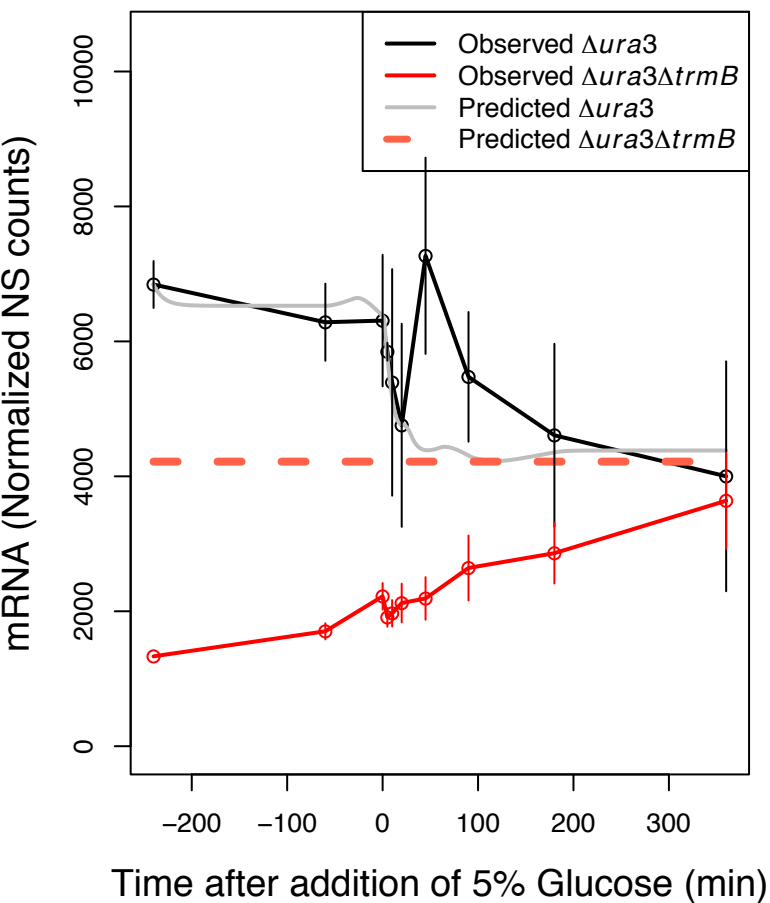

### *cbiG*

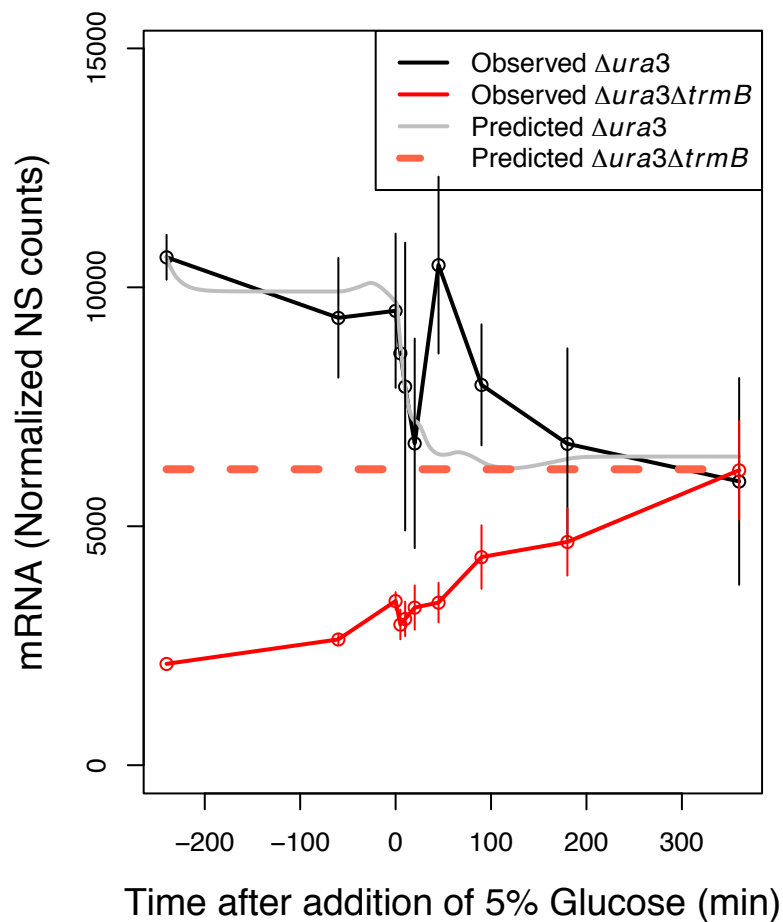

### *cbiJ*

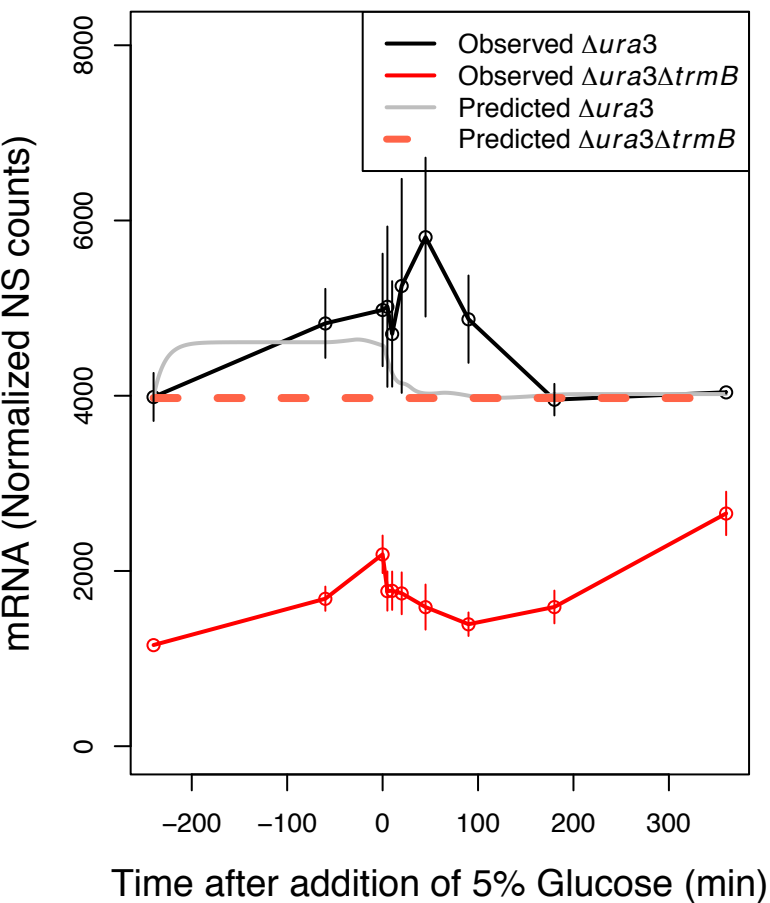

### *cbiL*

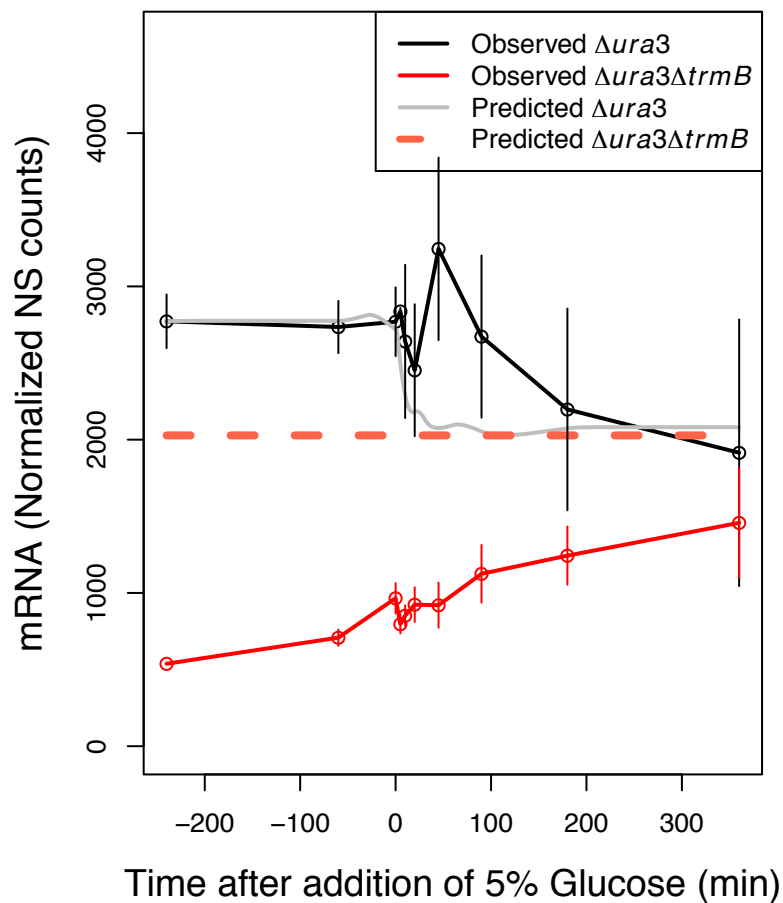

### *cbiP*

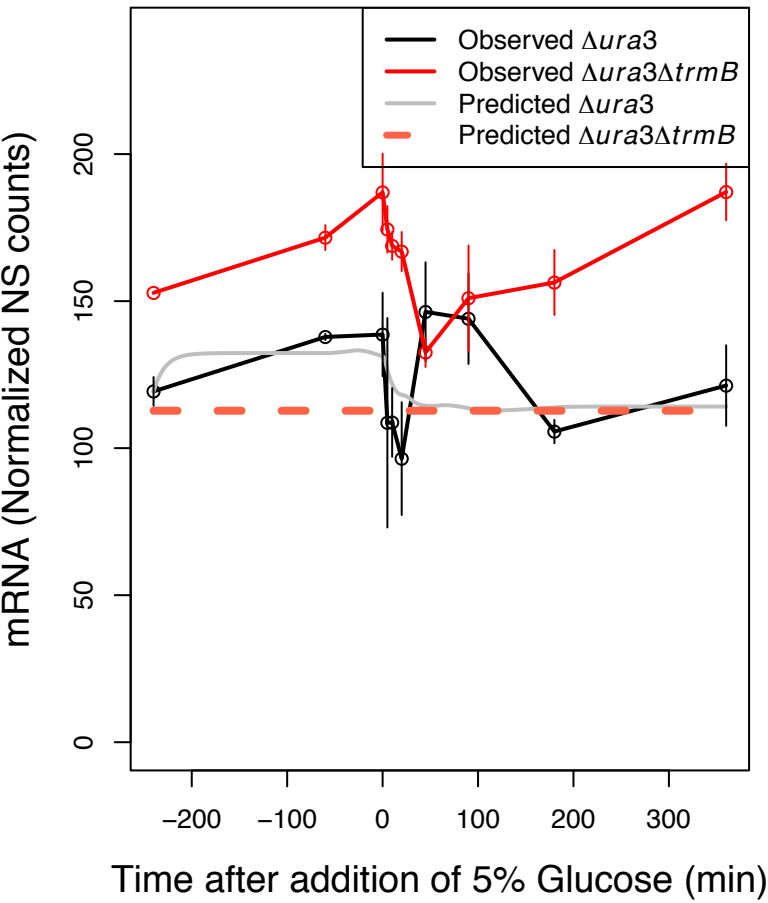

### *cbiT*

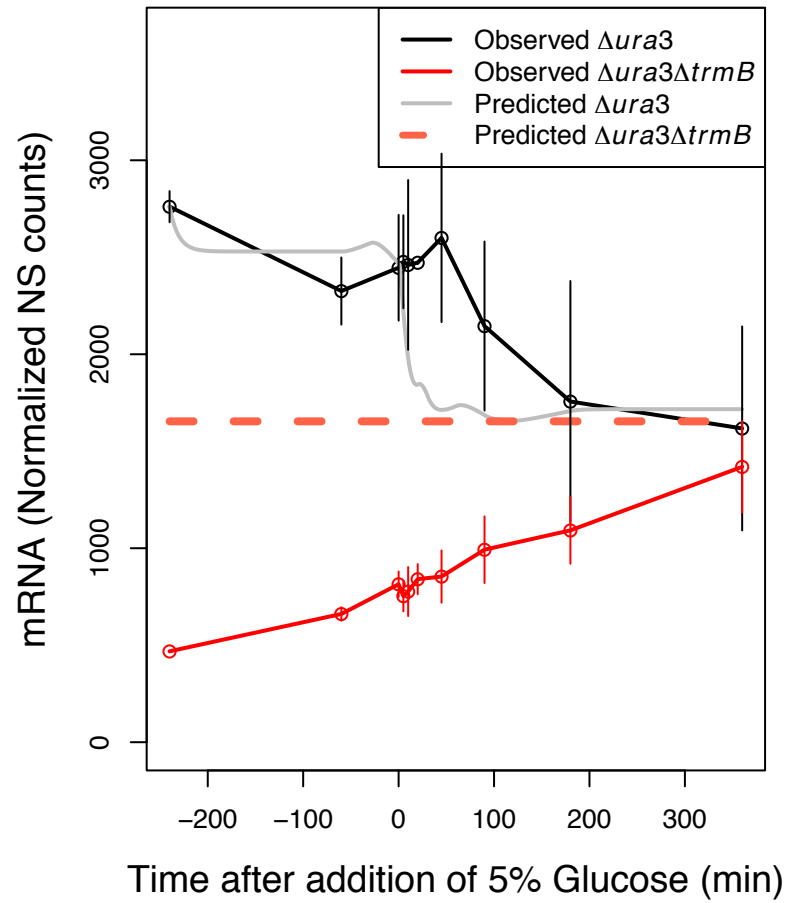

### *citZ*

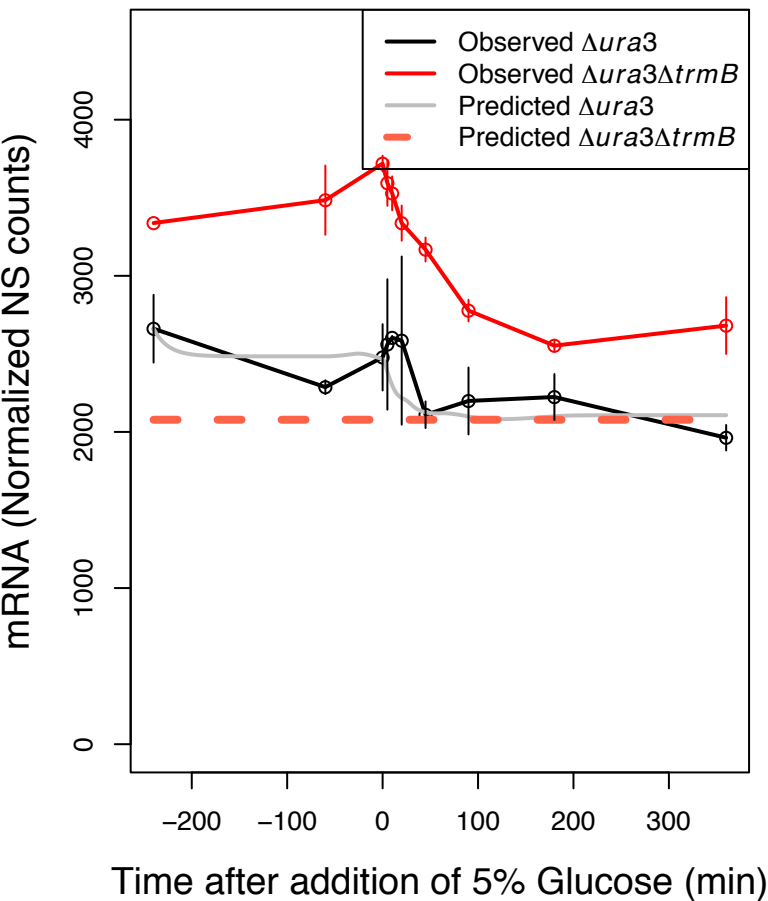

### *cobH*

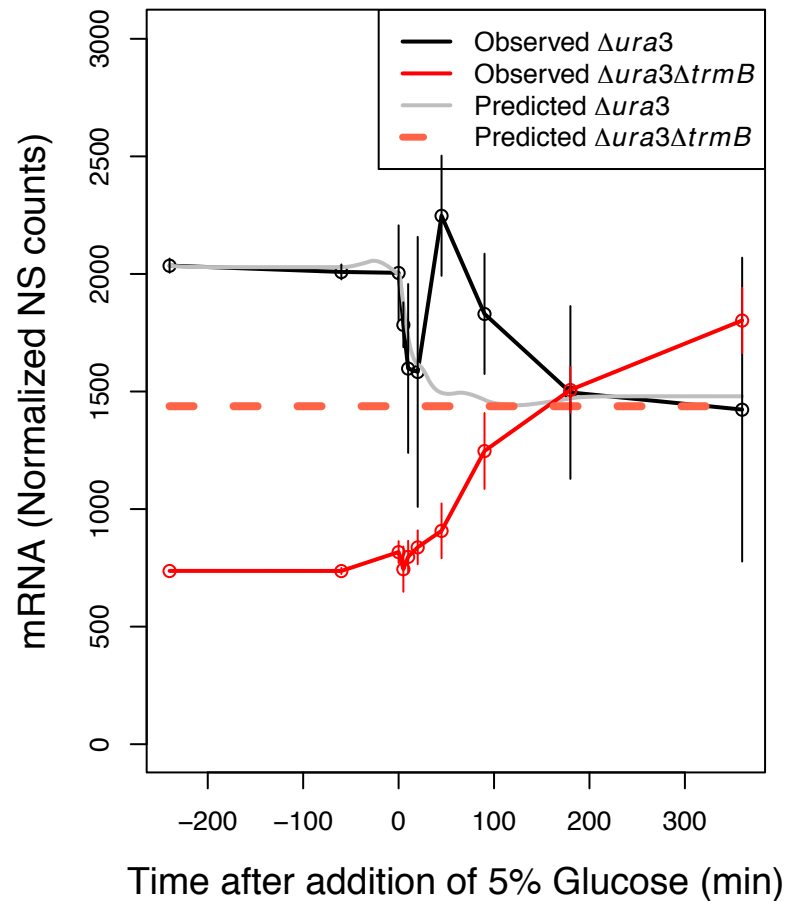

### *cobI*

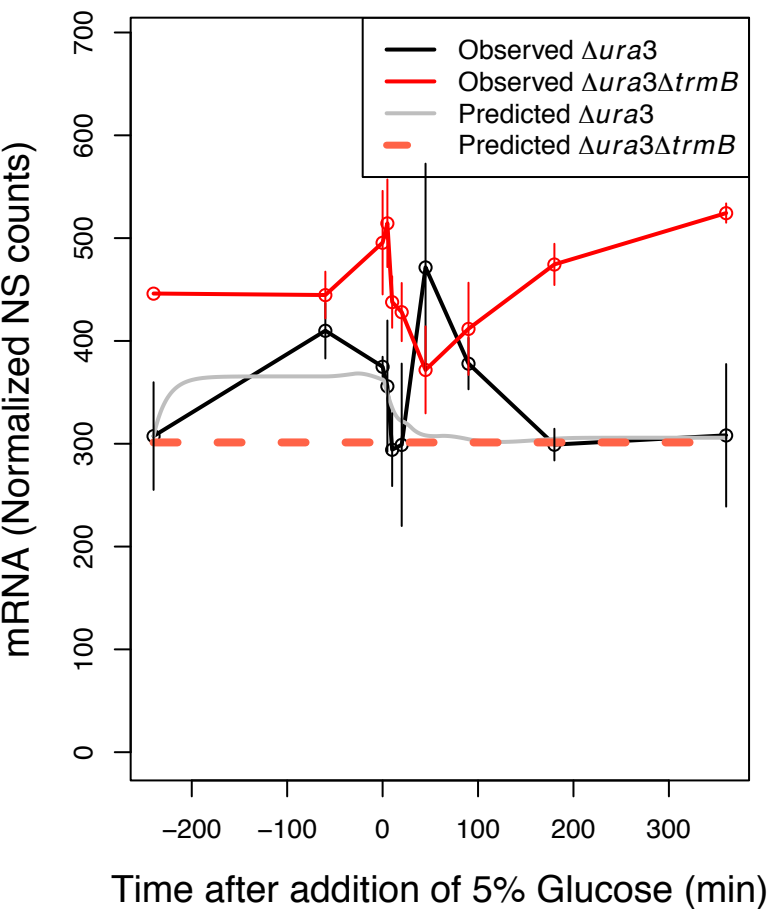

### *cobN*

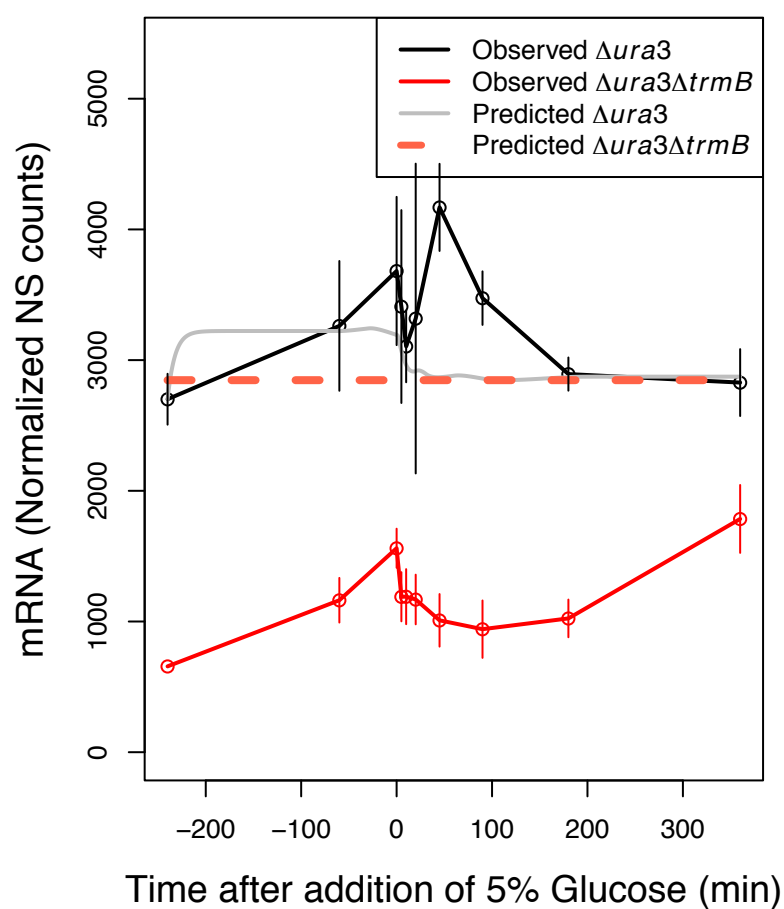

### *cxp*

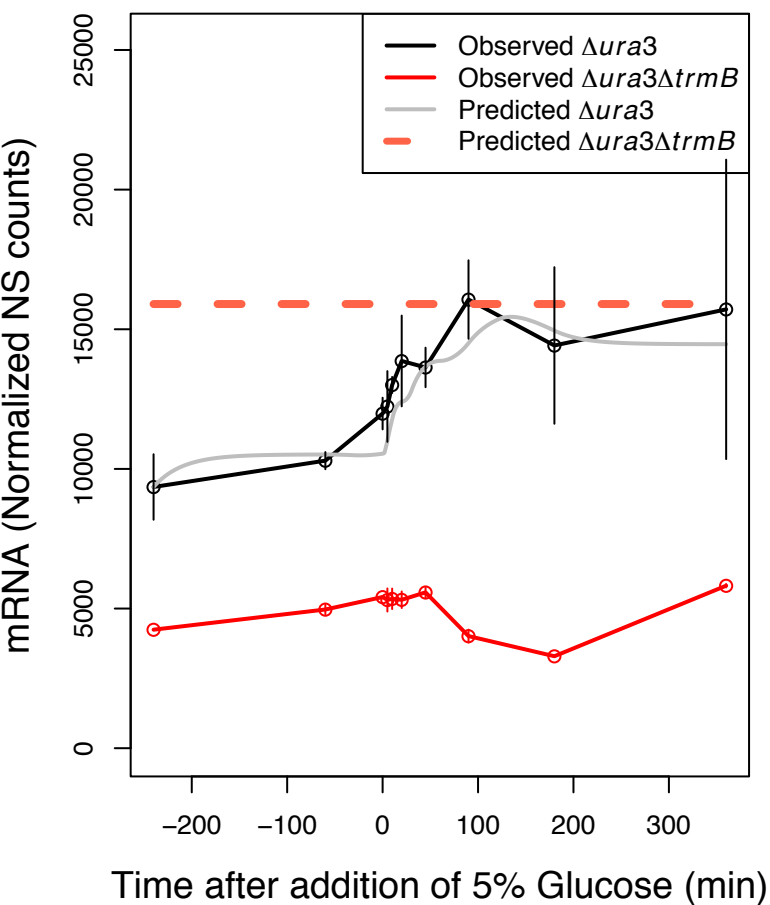

### *dapA*

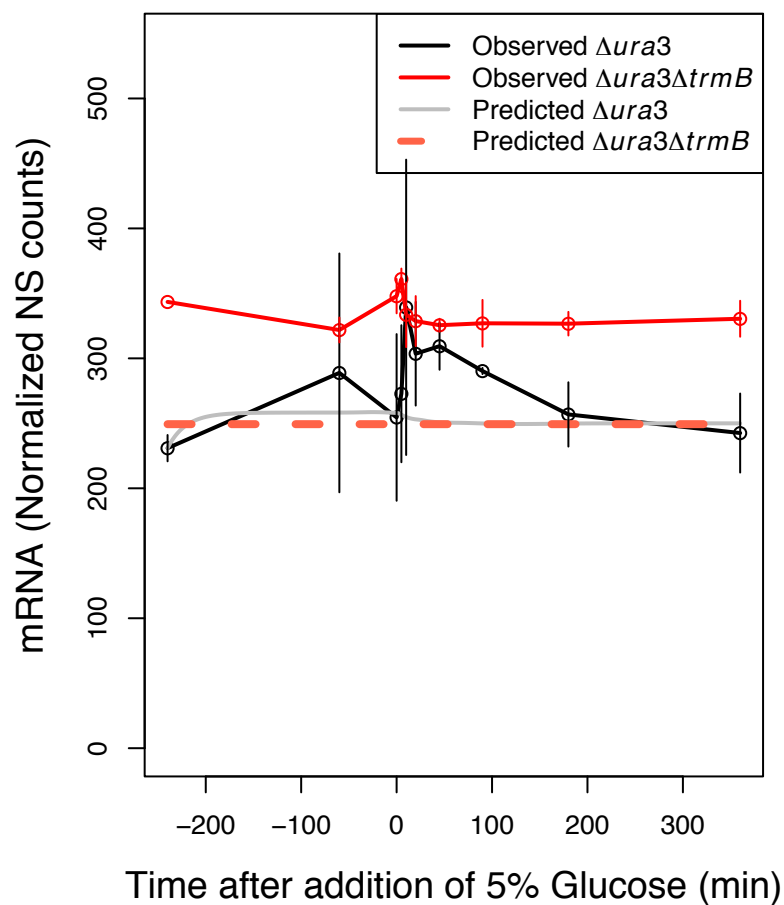

### *eno*

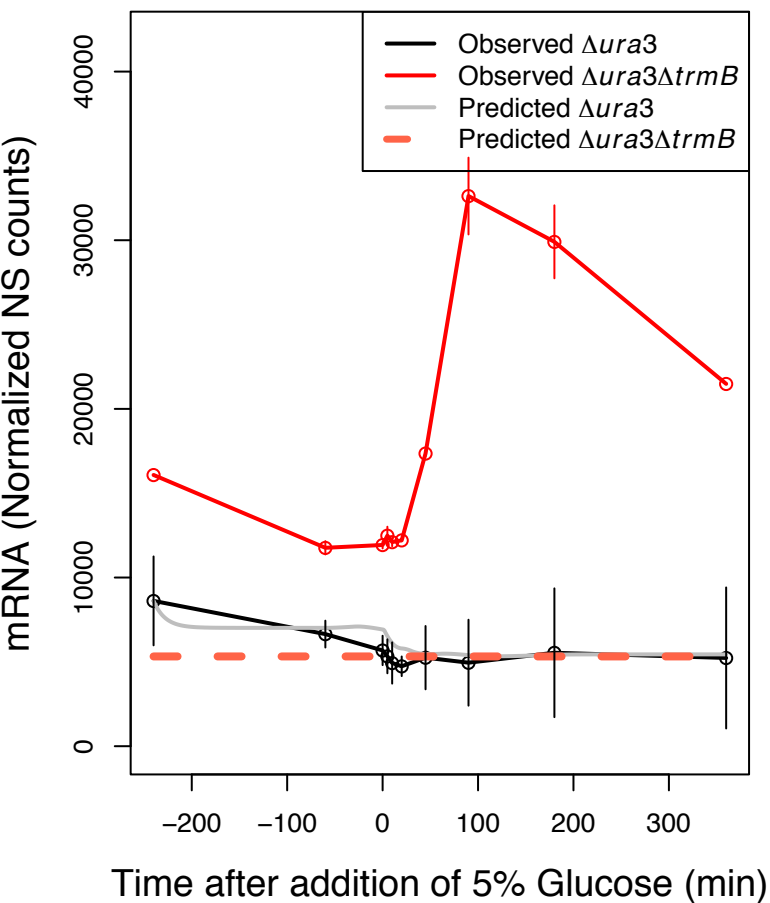

### *fbp*

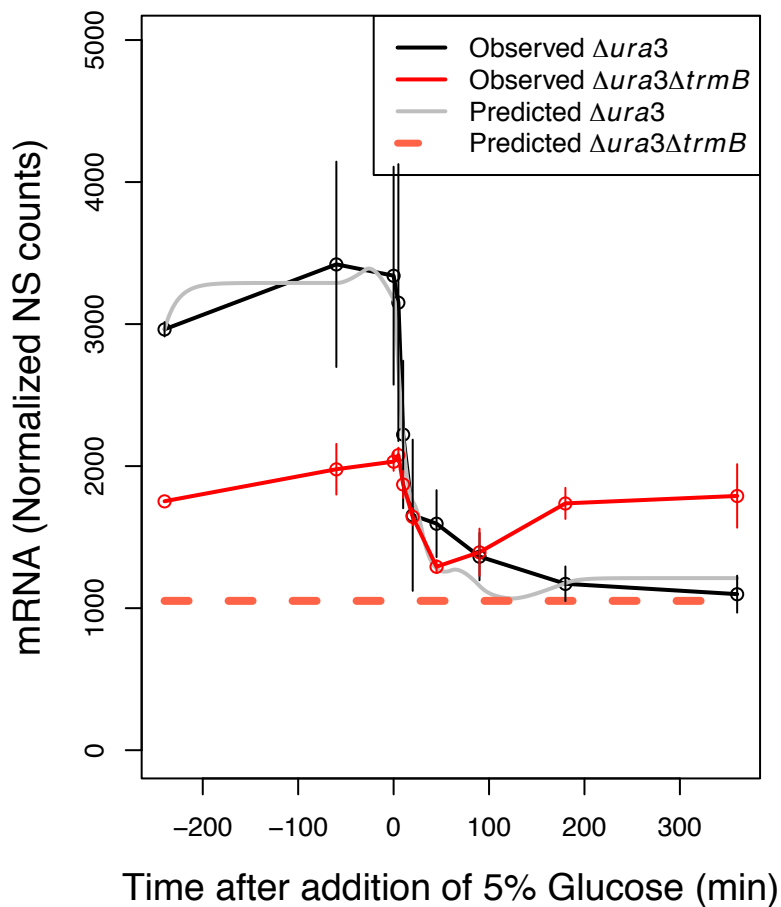

### *fumC*

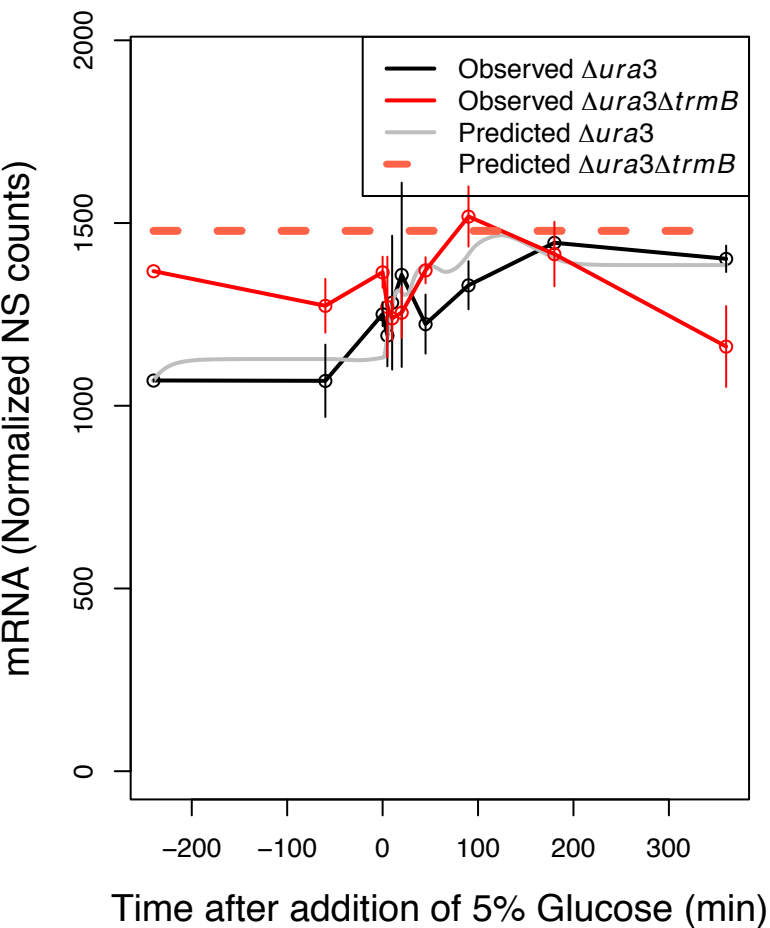

### *gap*

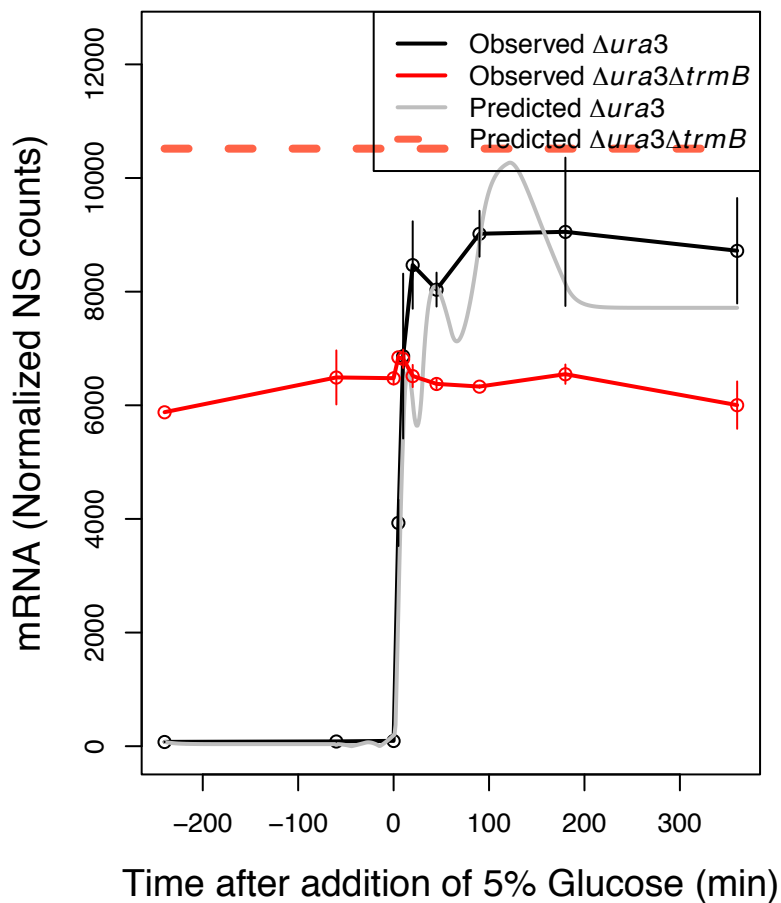



### *gapB*

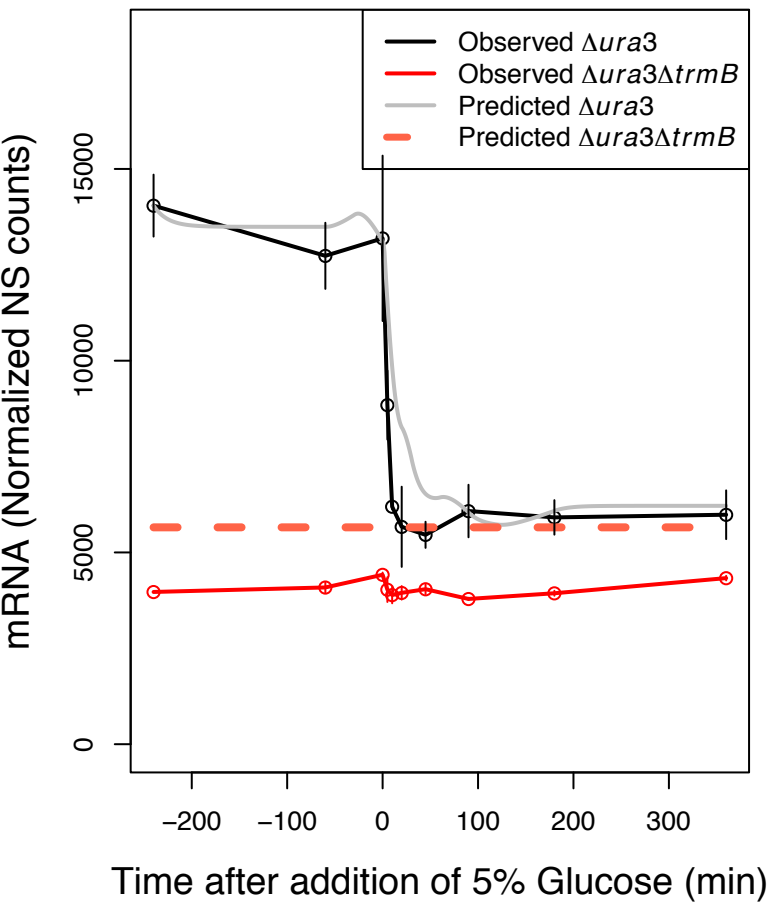

### *gcd*

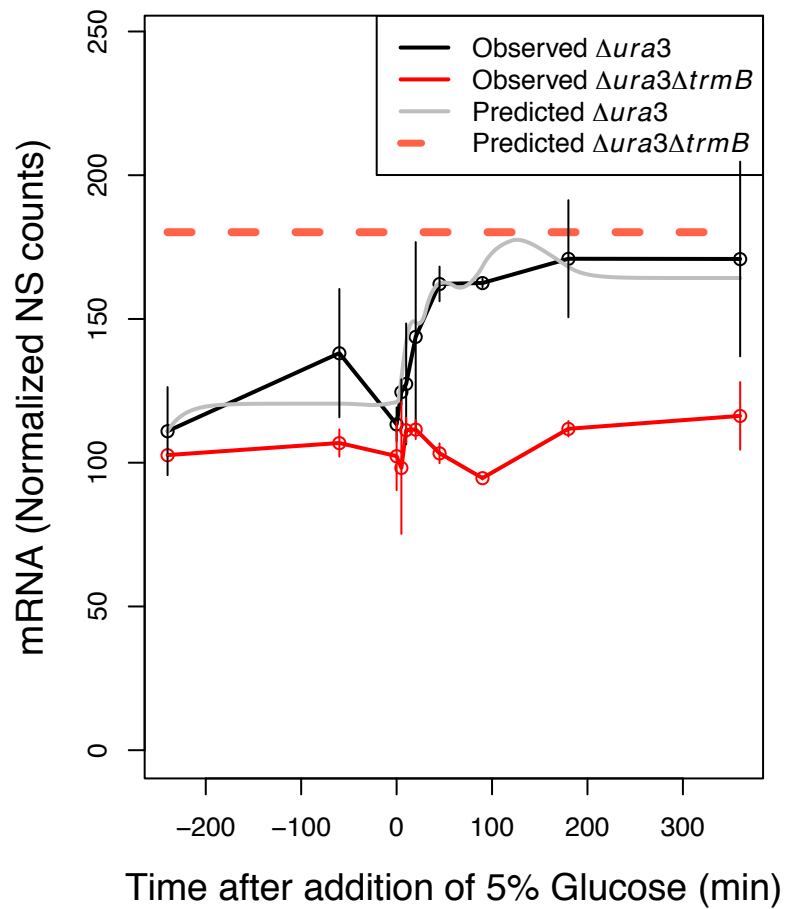

### *gdhA1*

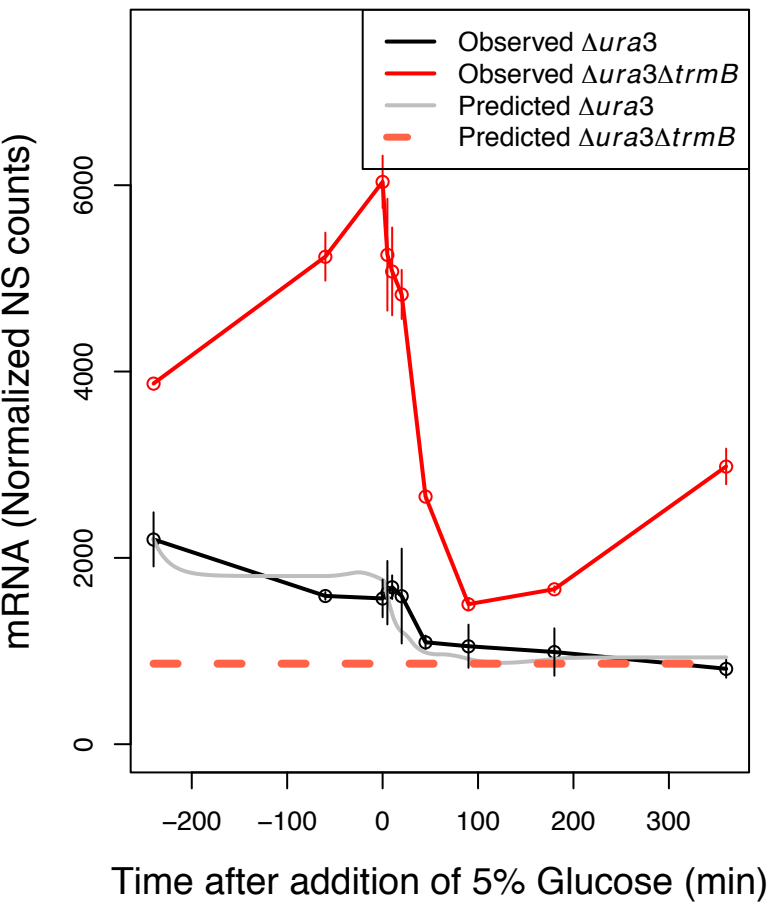

### *gdhA2*

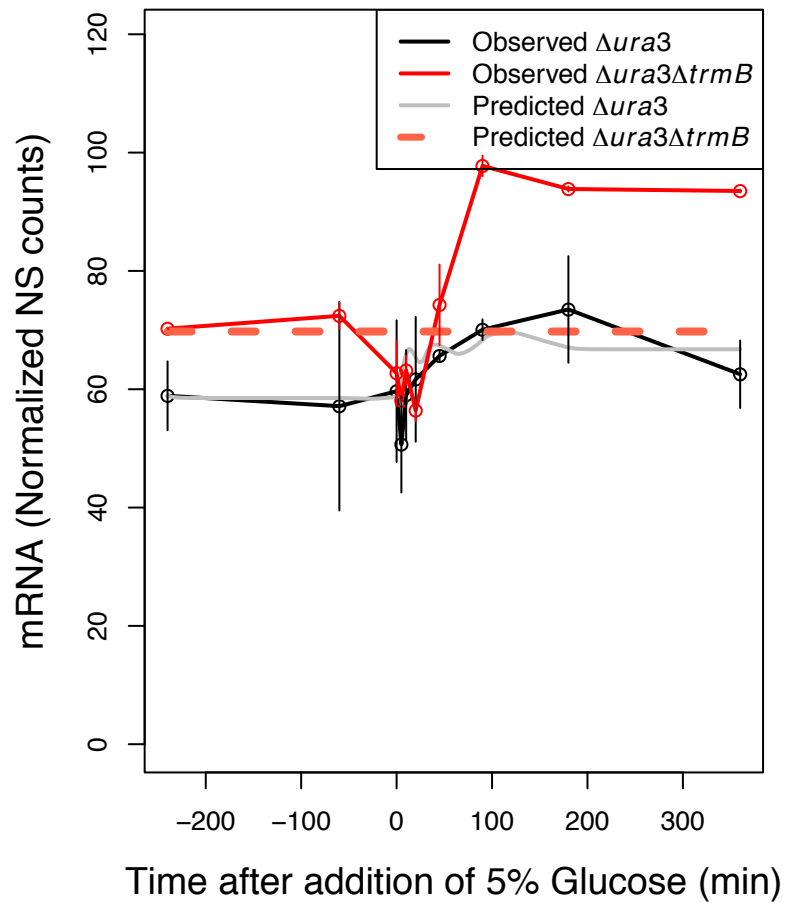

### *gdhB*

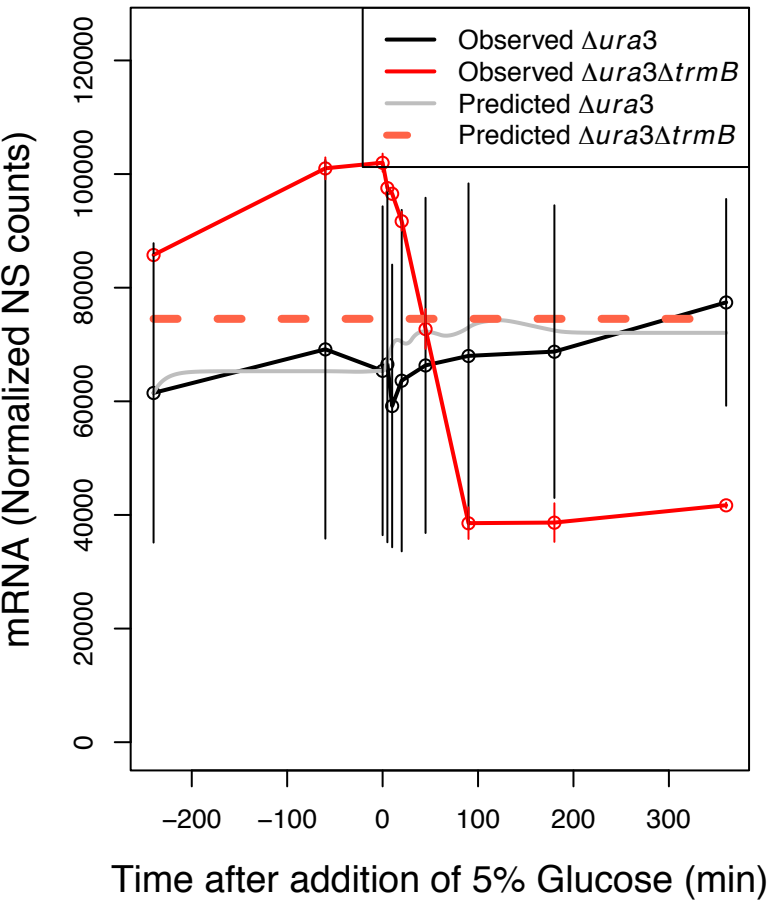

### *glcD*

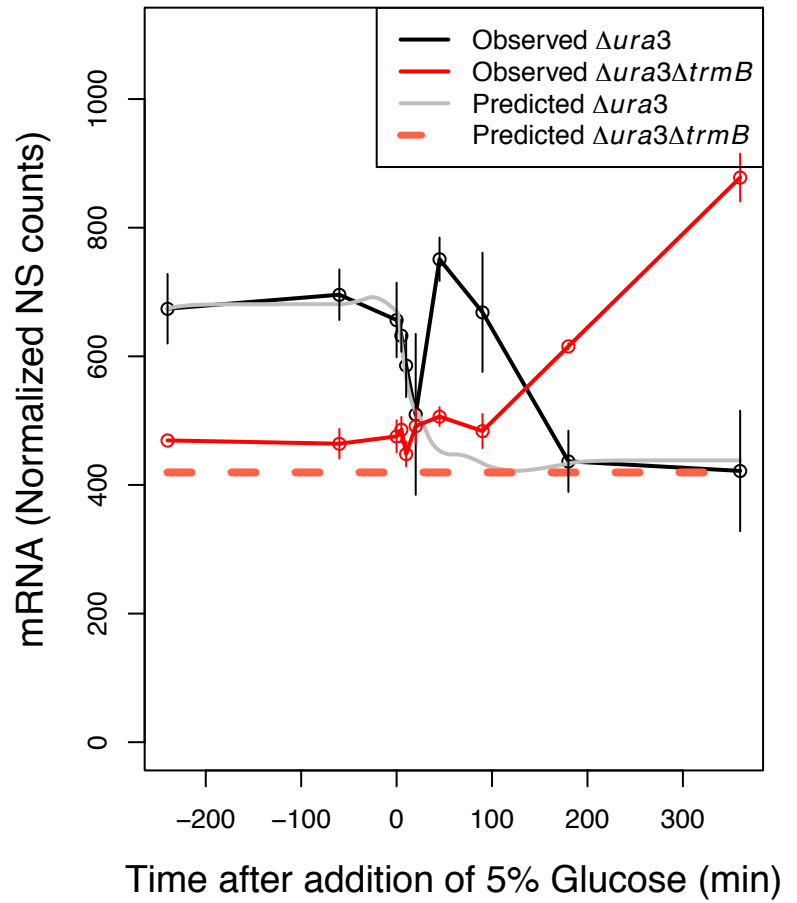

### *glcK*

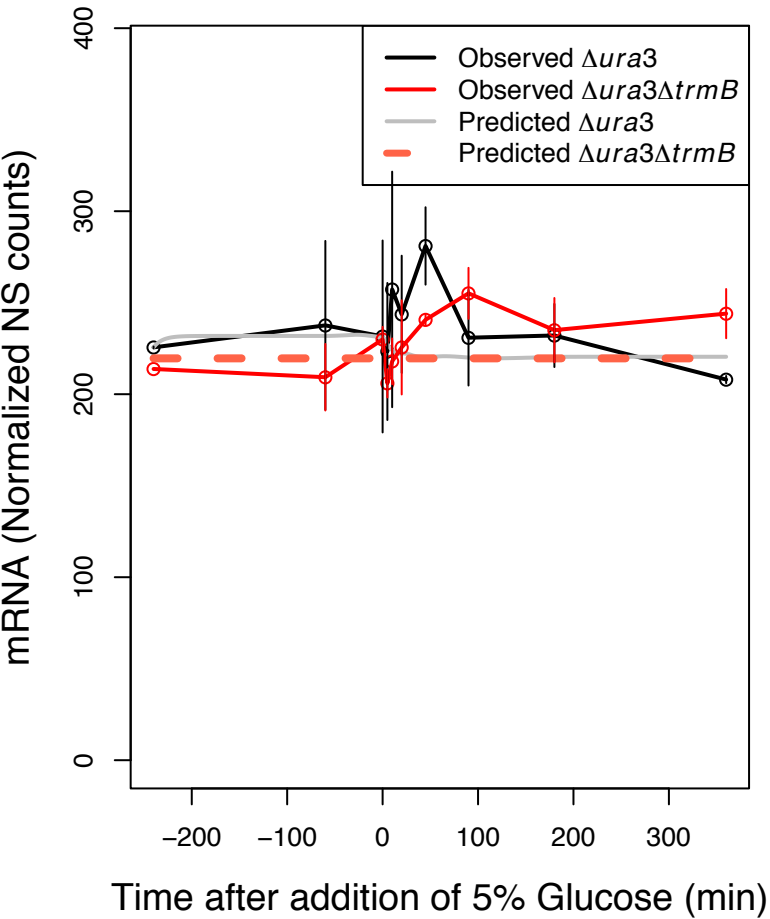

### *glnA*

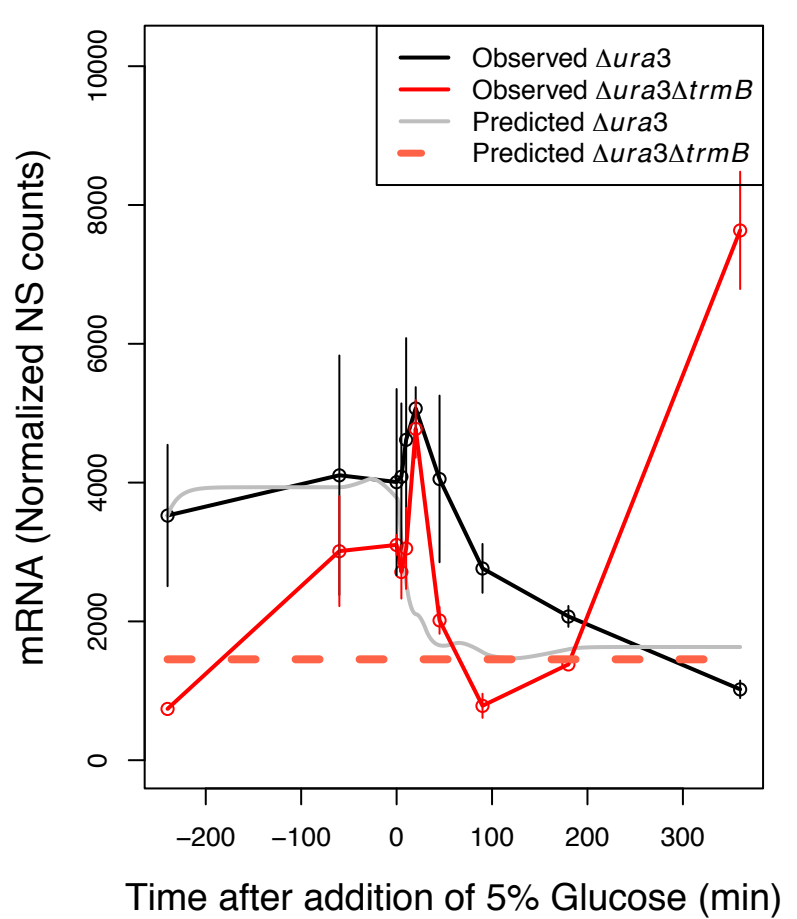

### *glpK*

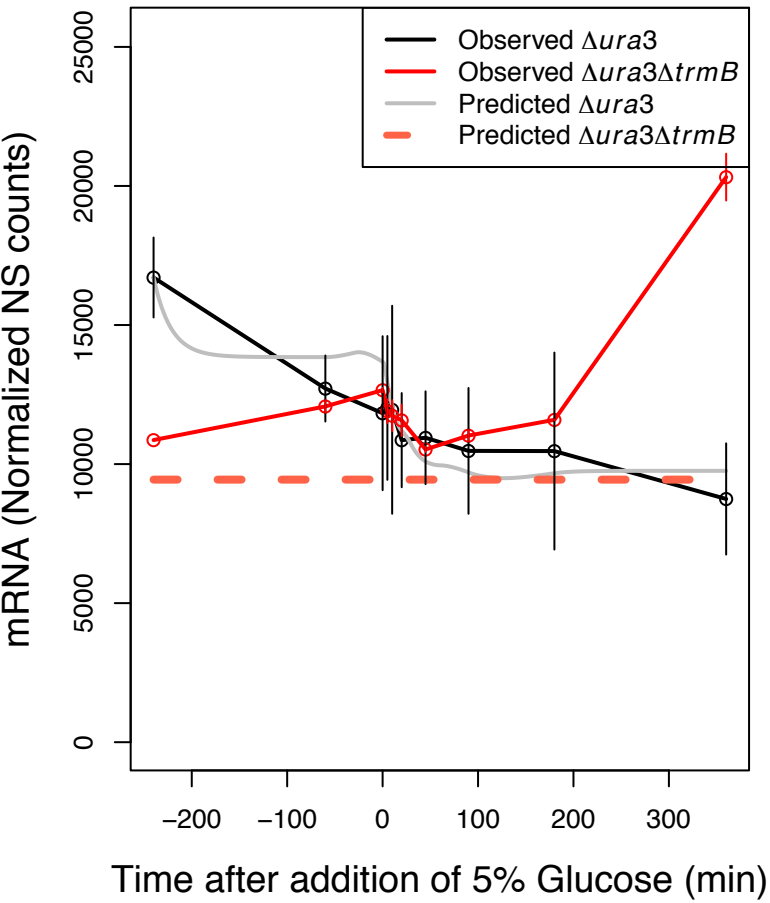

### *glyA*

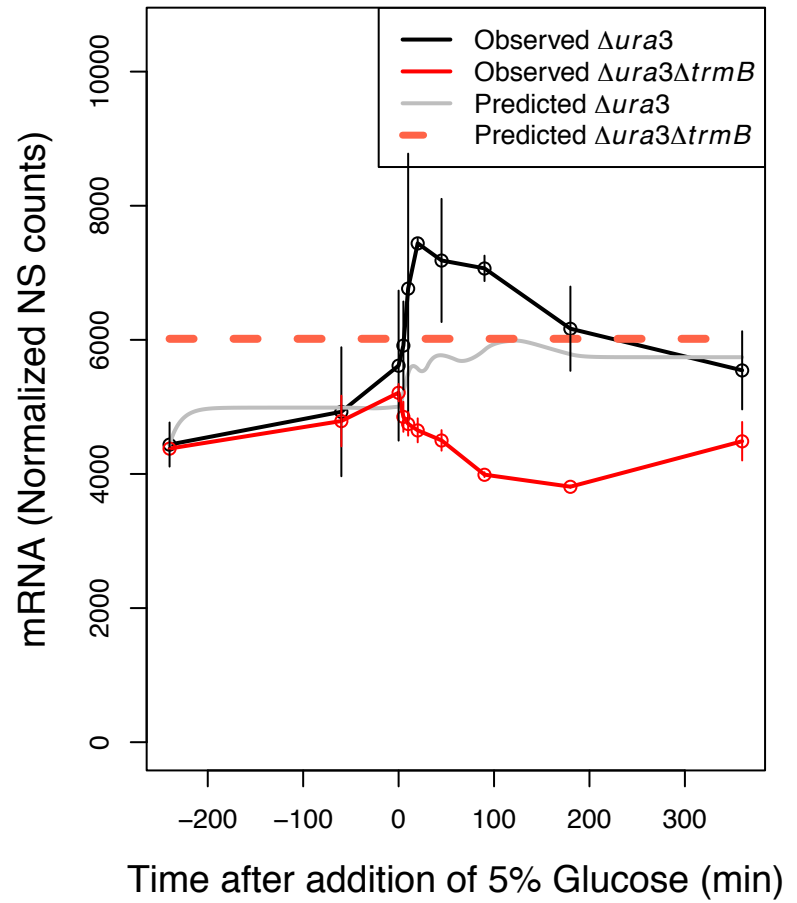

### *gpdA2*

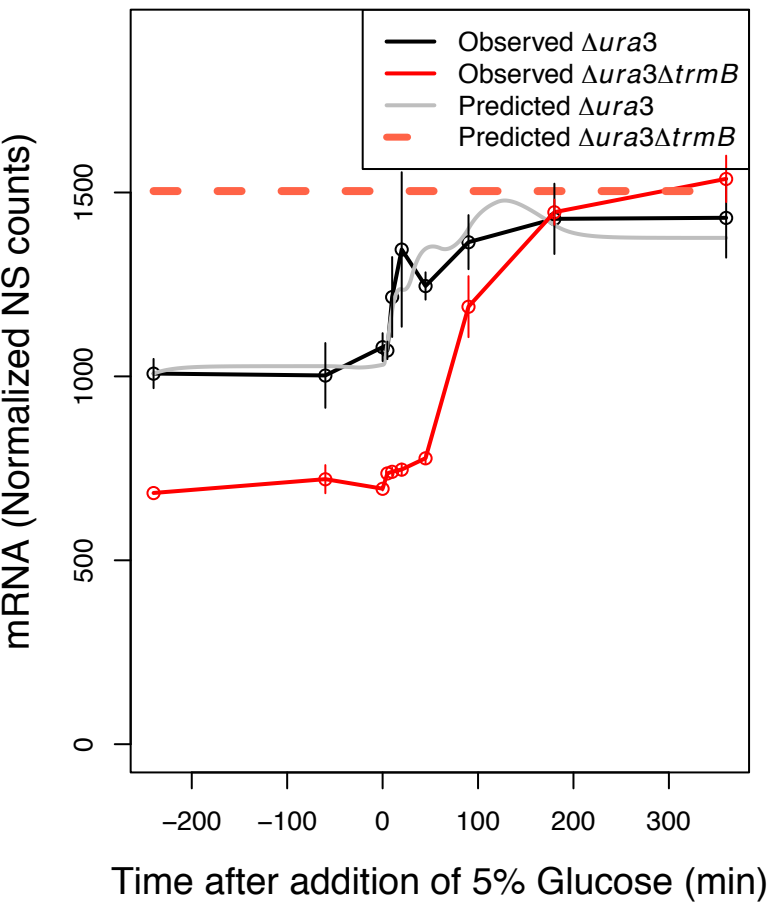

### *gpdB*

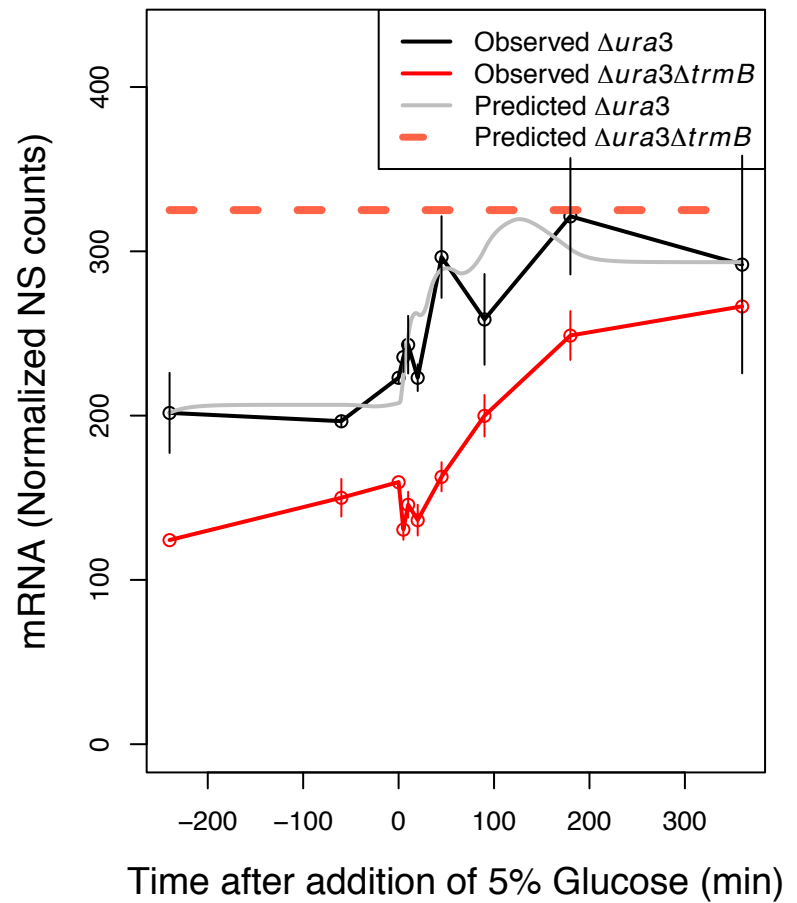

### *gpdC*

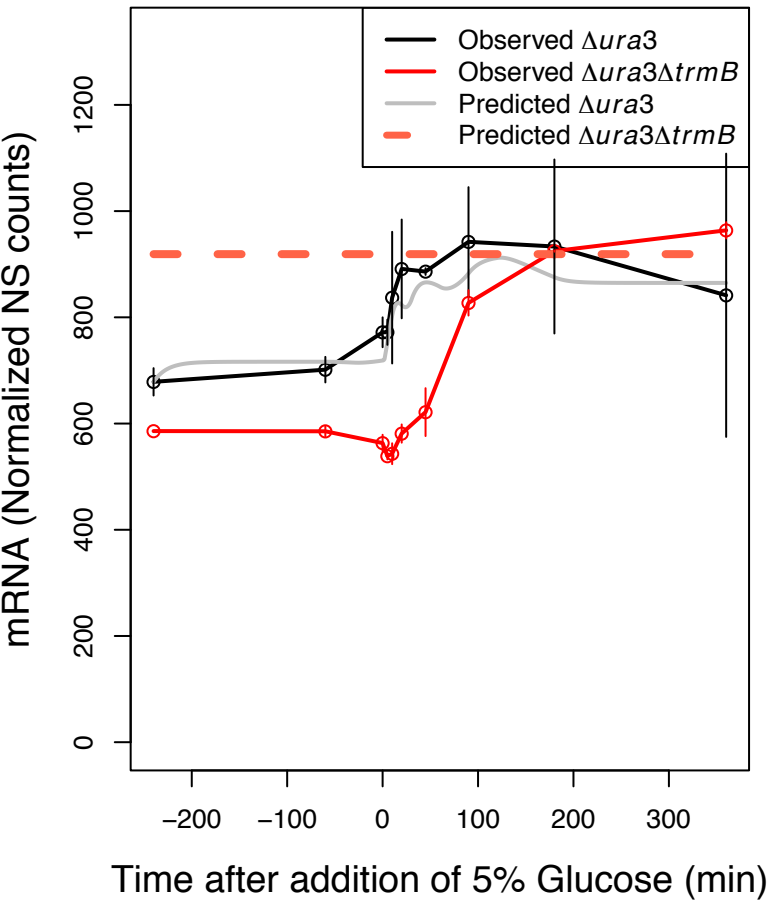

### *gpm*

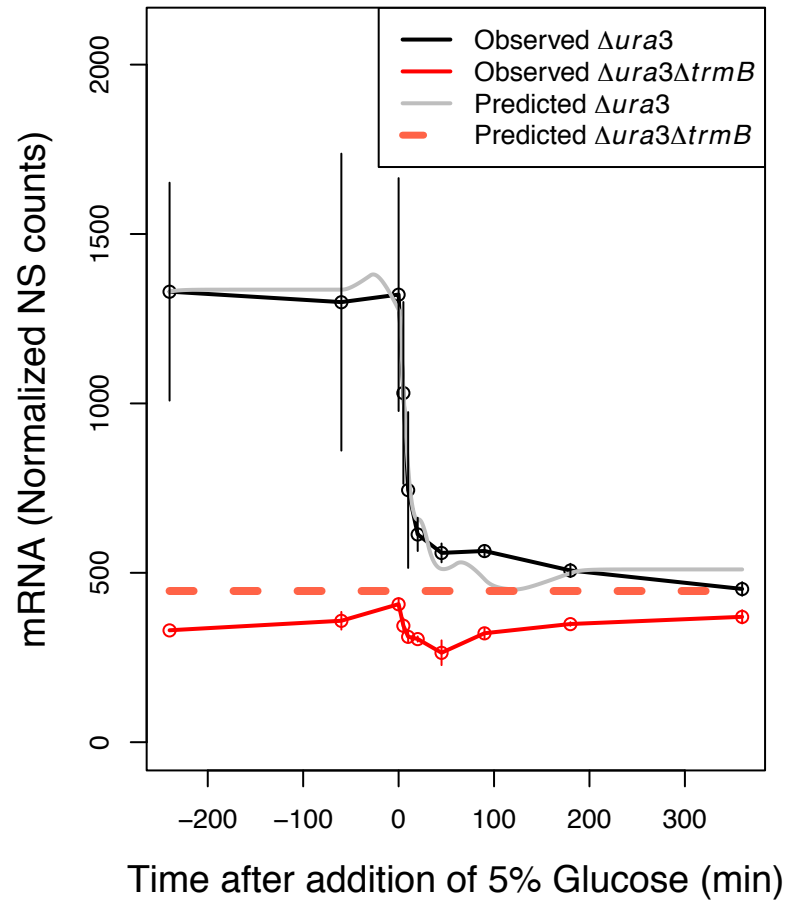

### *graD2*

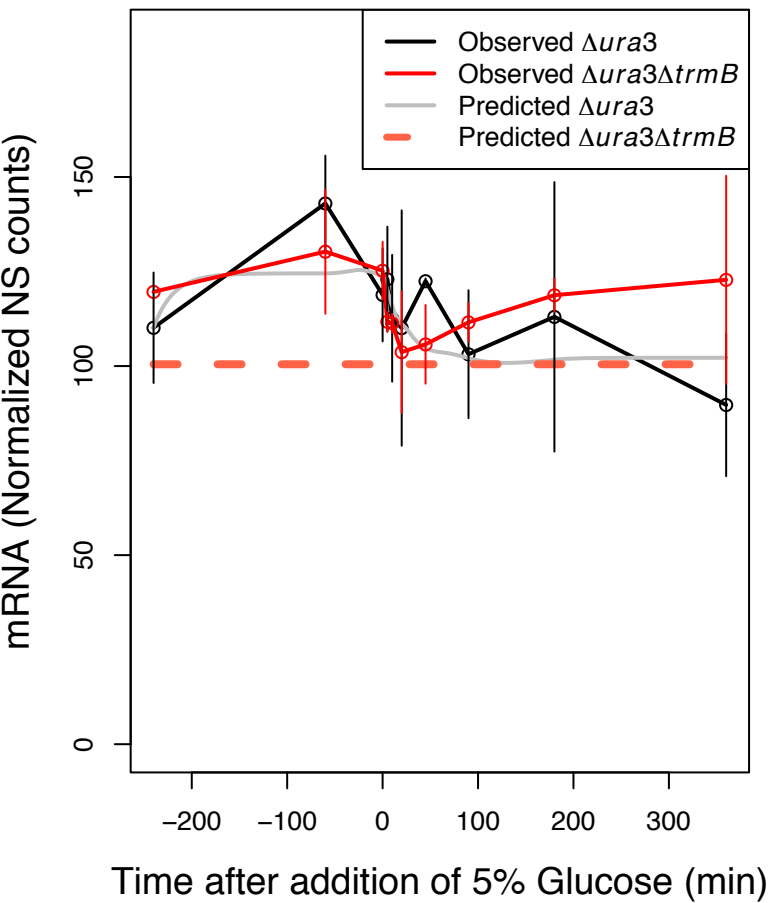

### *icd*

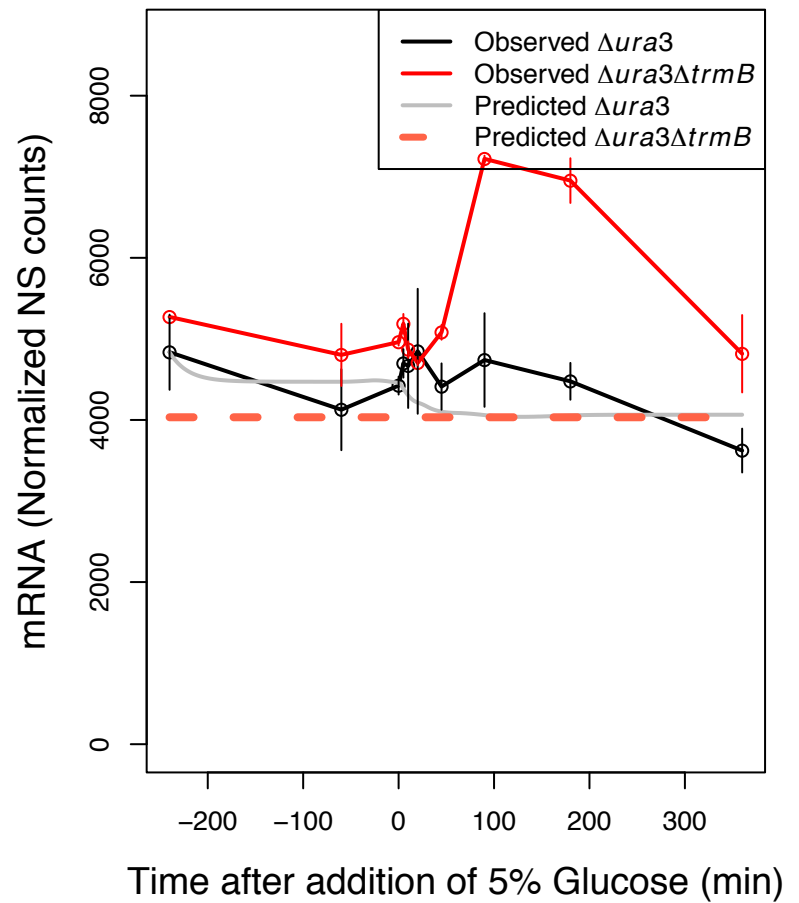

### *kdgK*

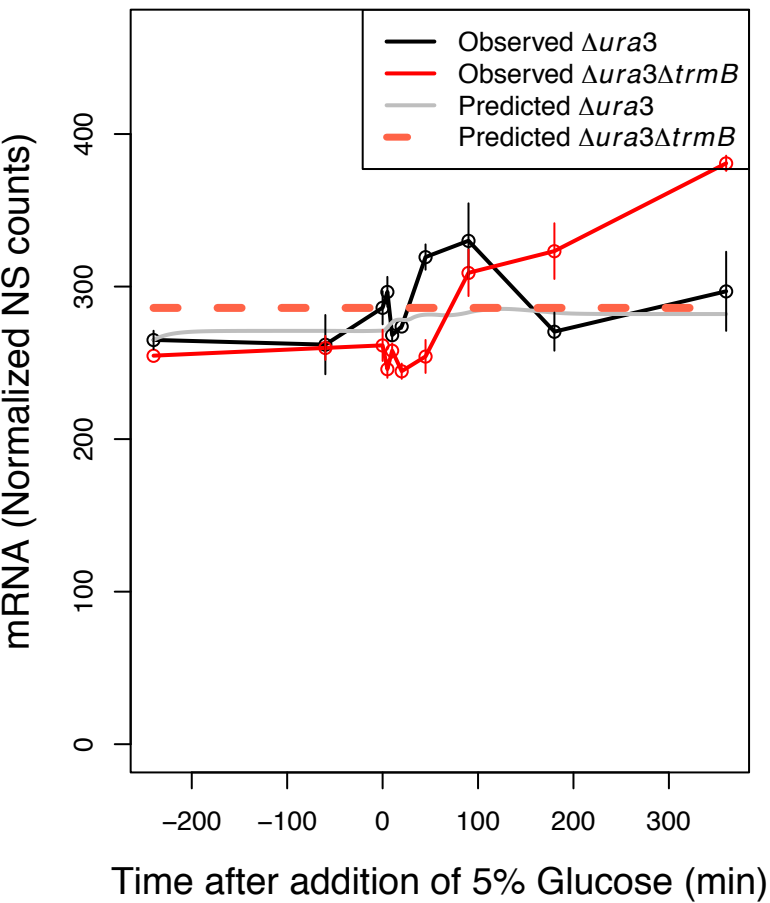

### *korA*

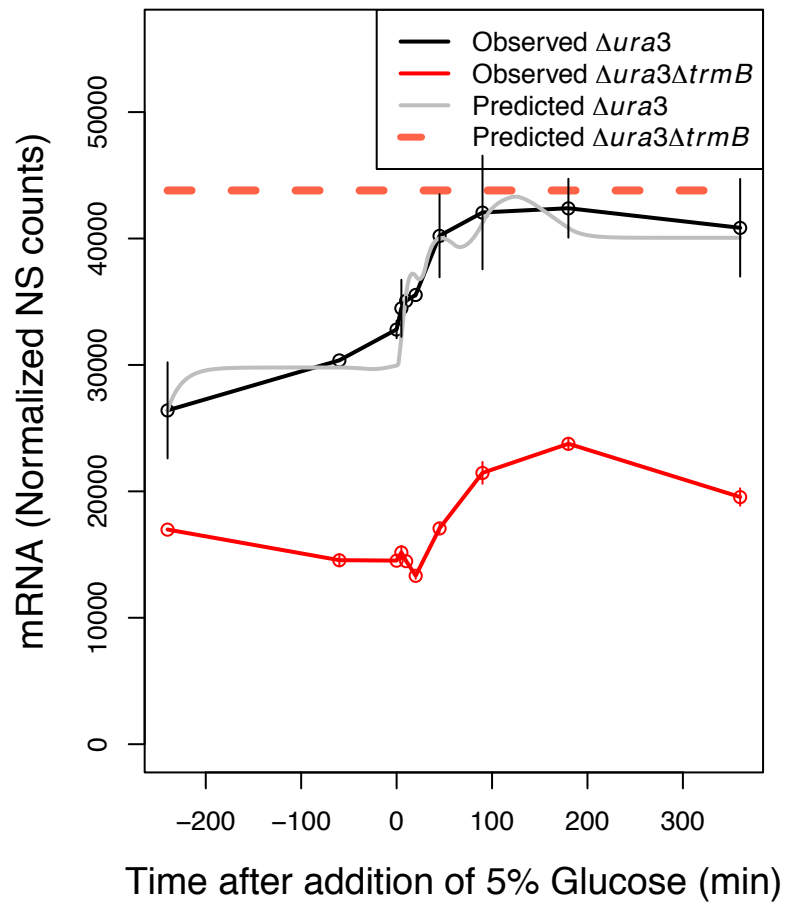

### *korB*

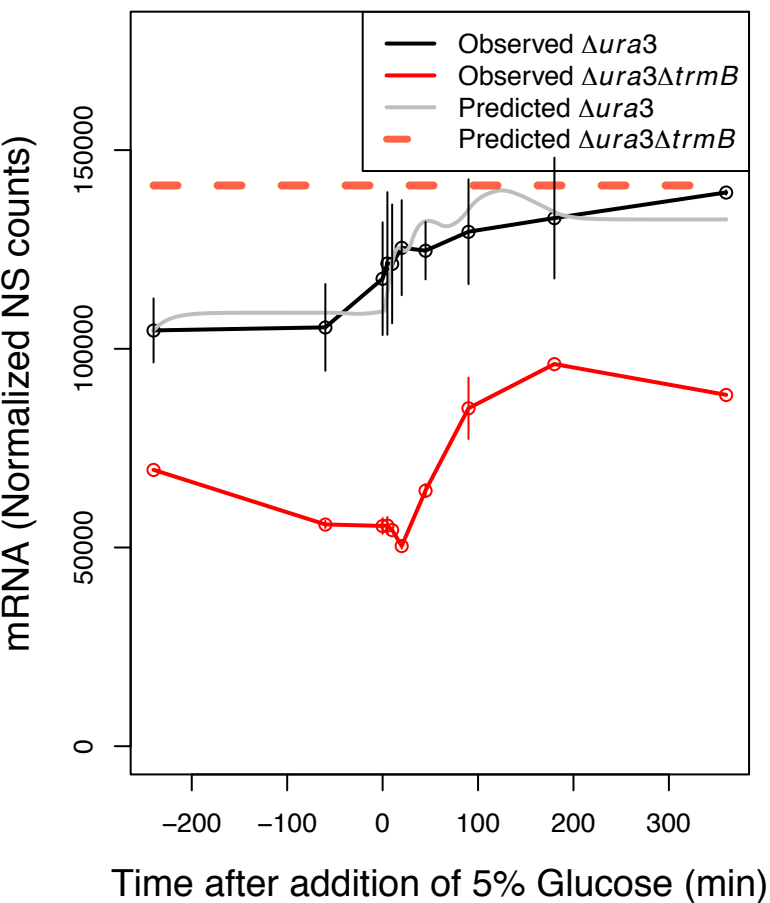

### *mdh*

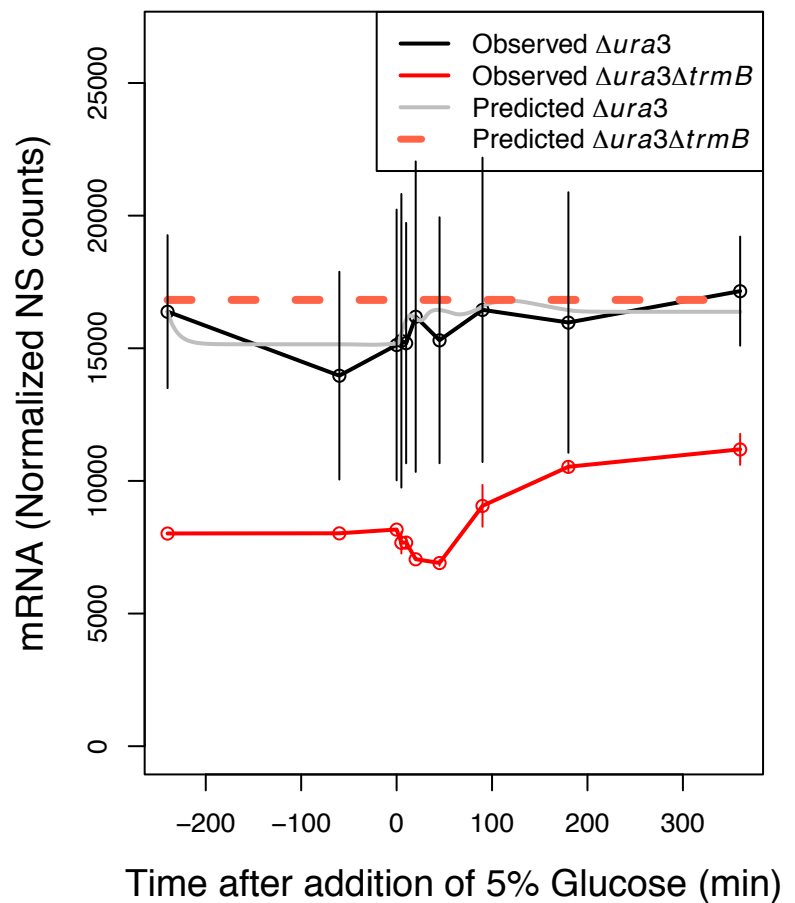

### *mdhA*

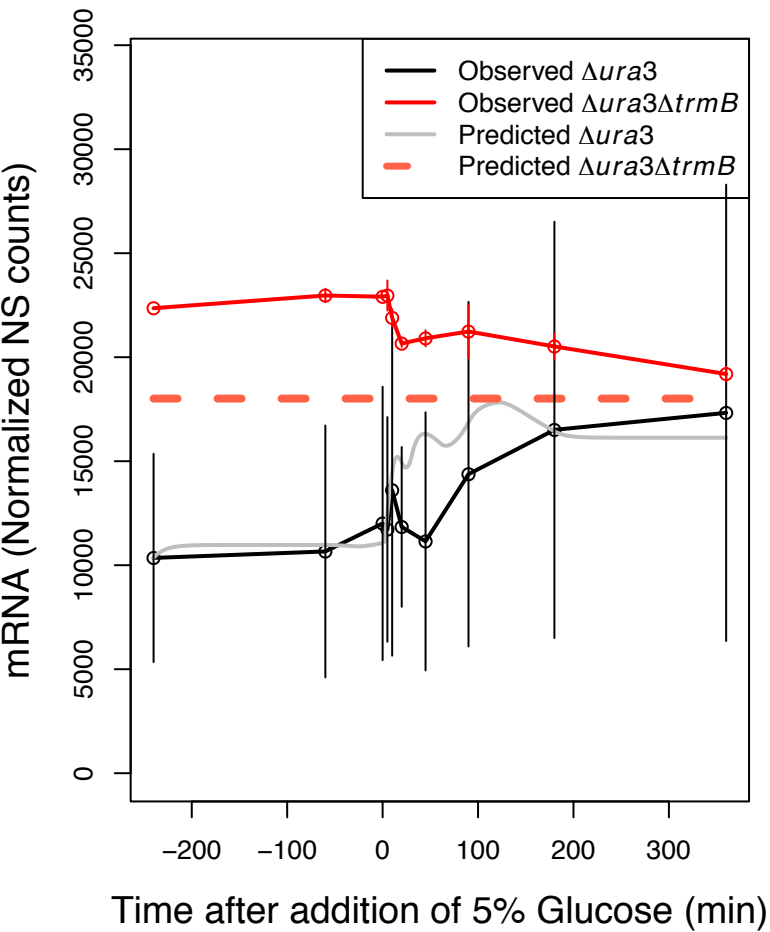

### *menD*

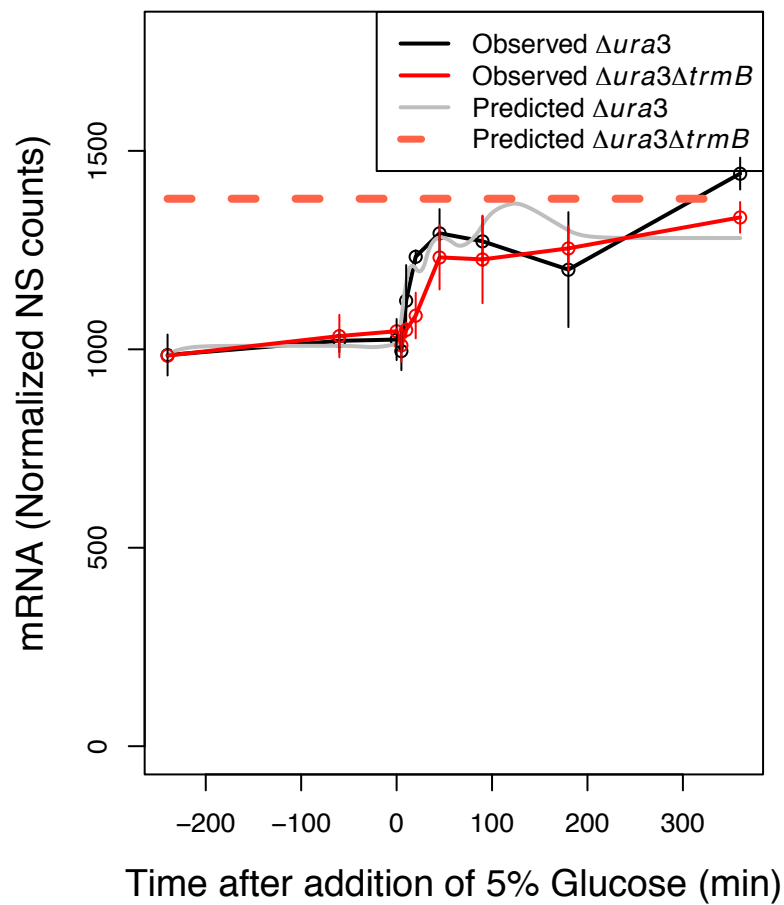

### *menF*

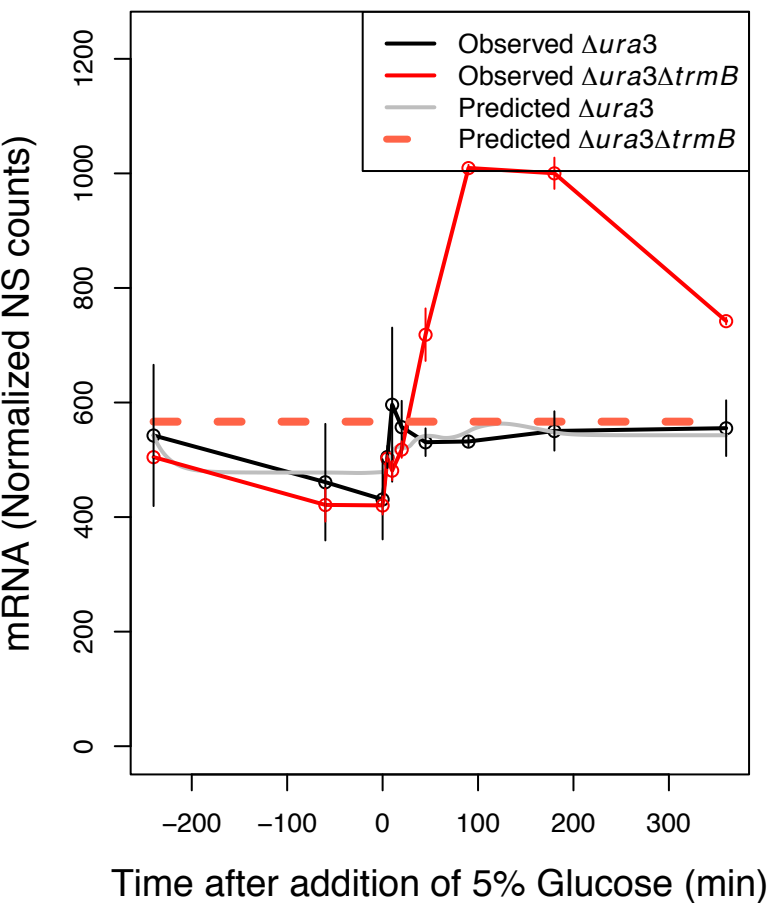

### *mrp*

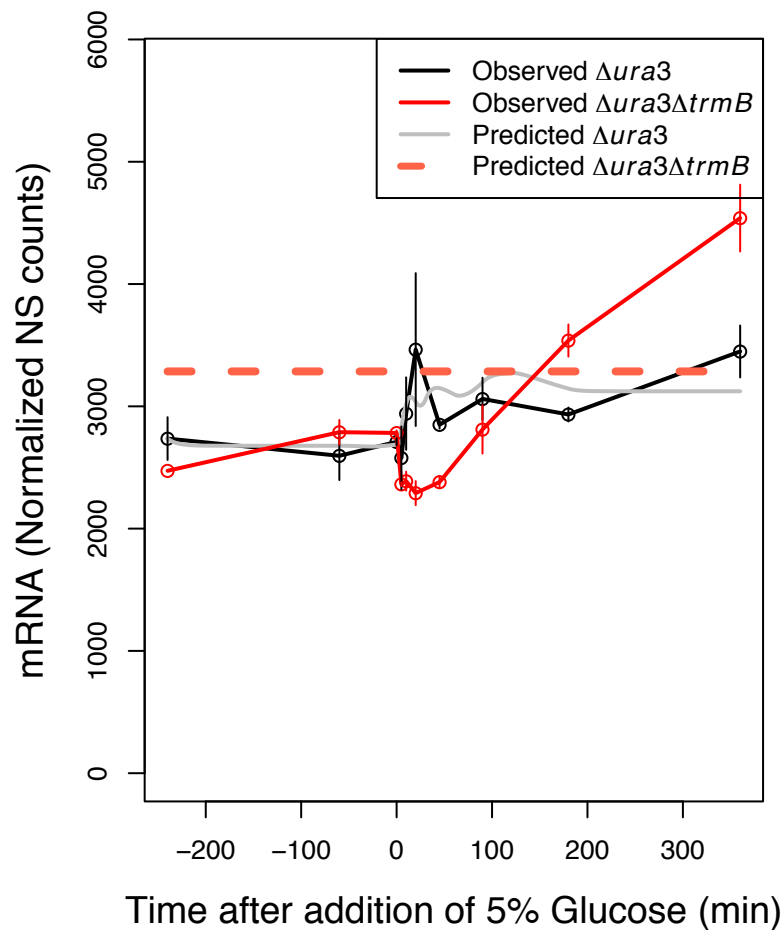

### *mvaA*

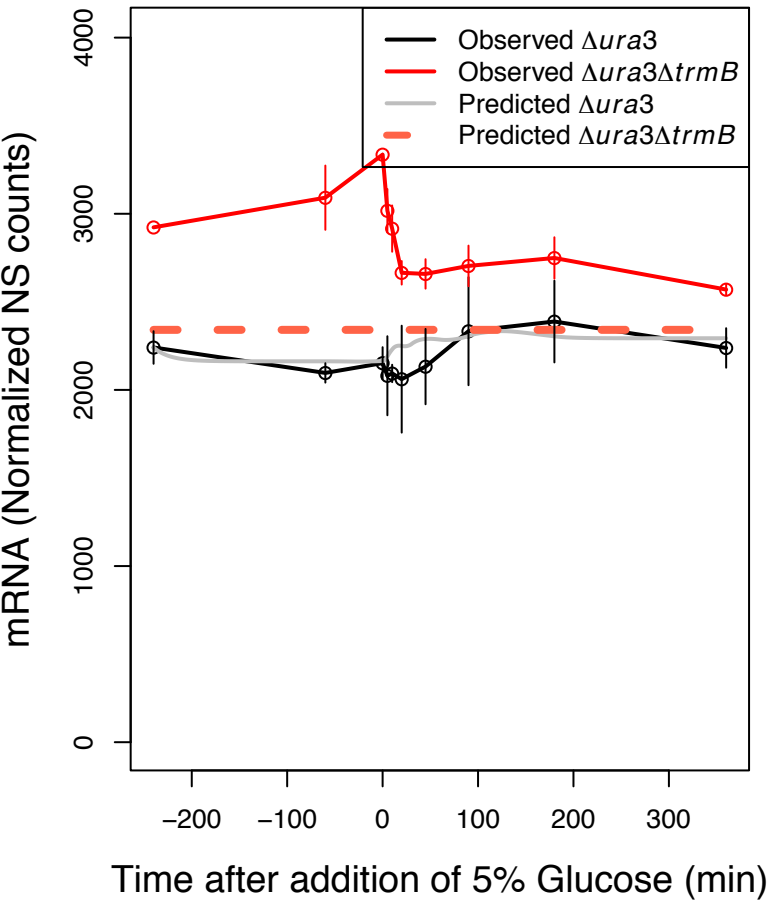

### *mvaB*

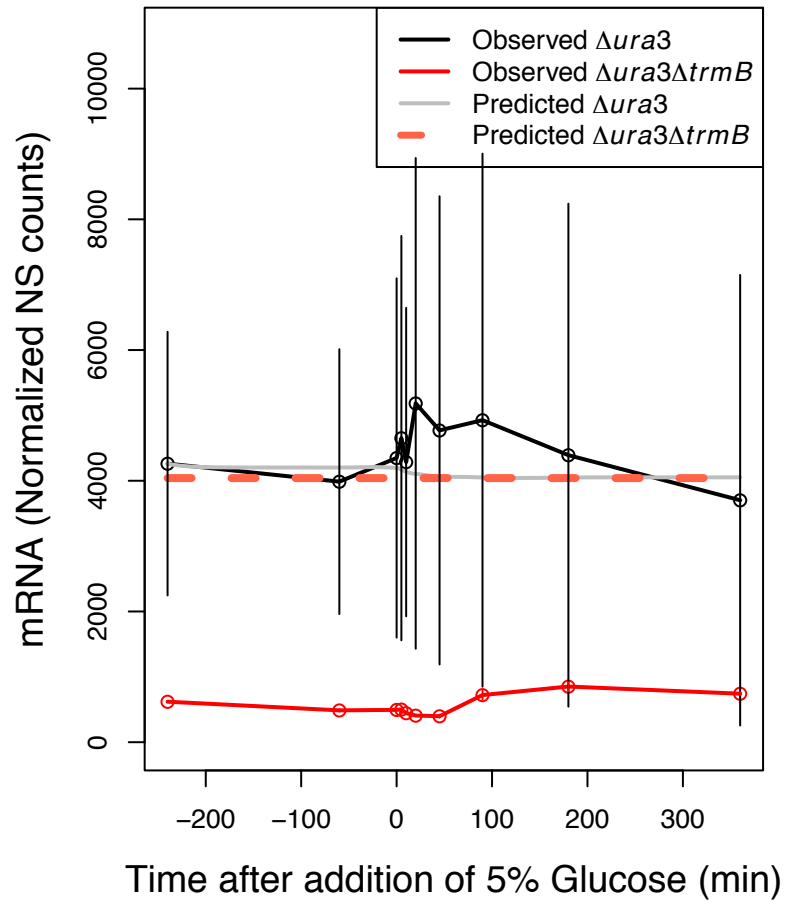

### *ndhG3*

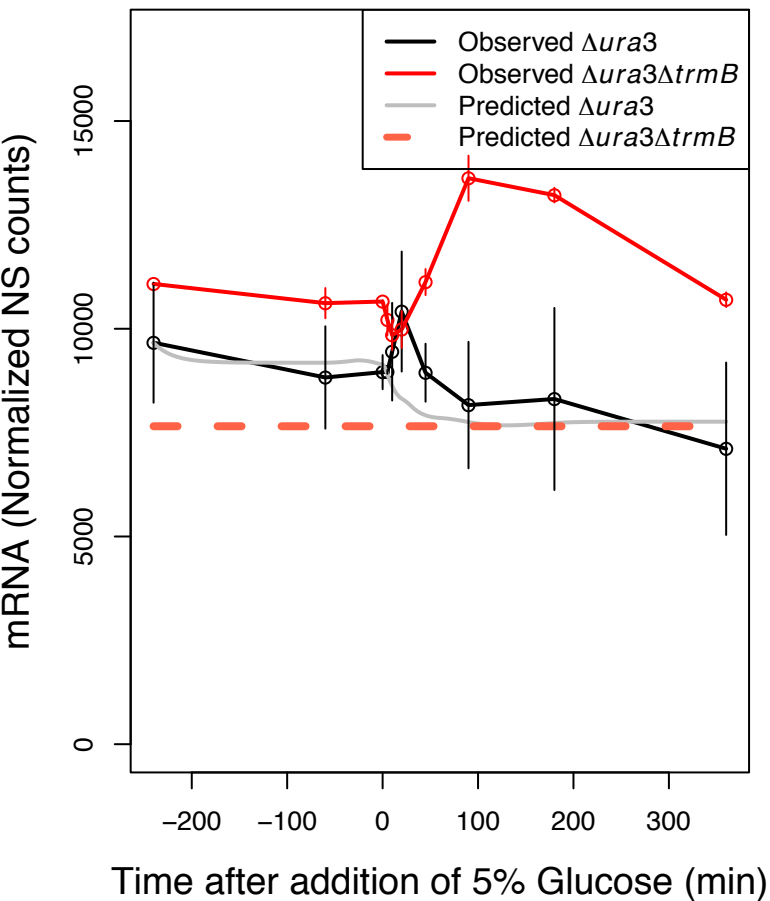

### *nhaC2*

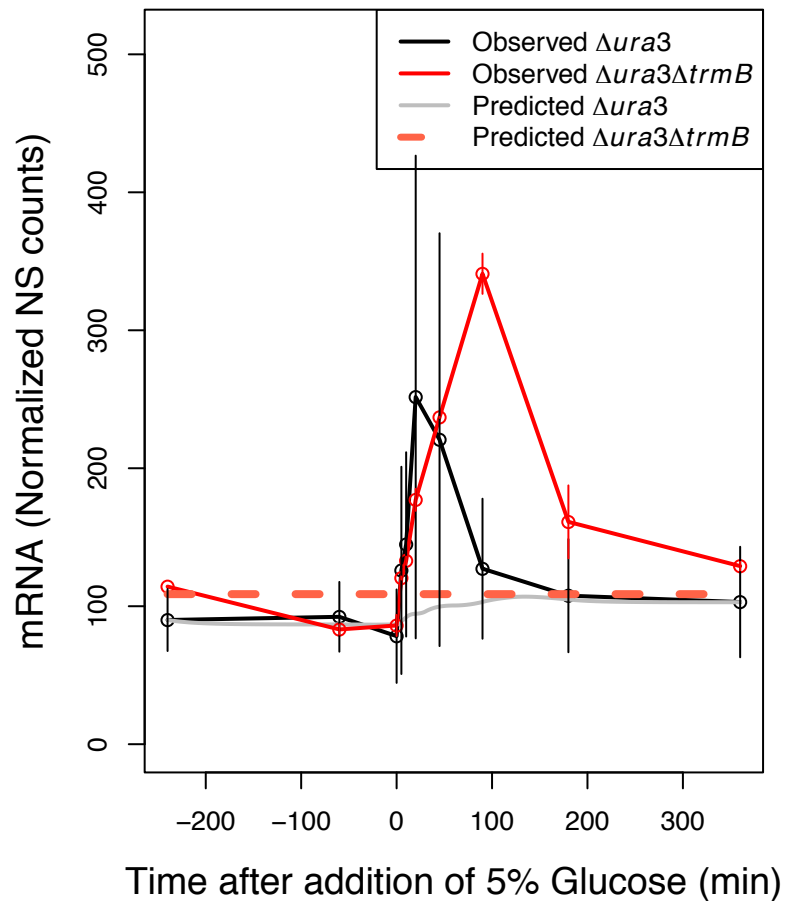

*pgi*

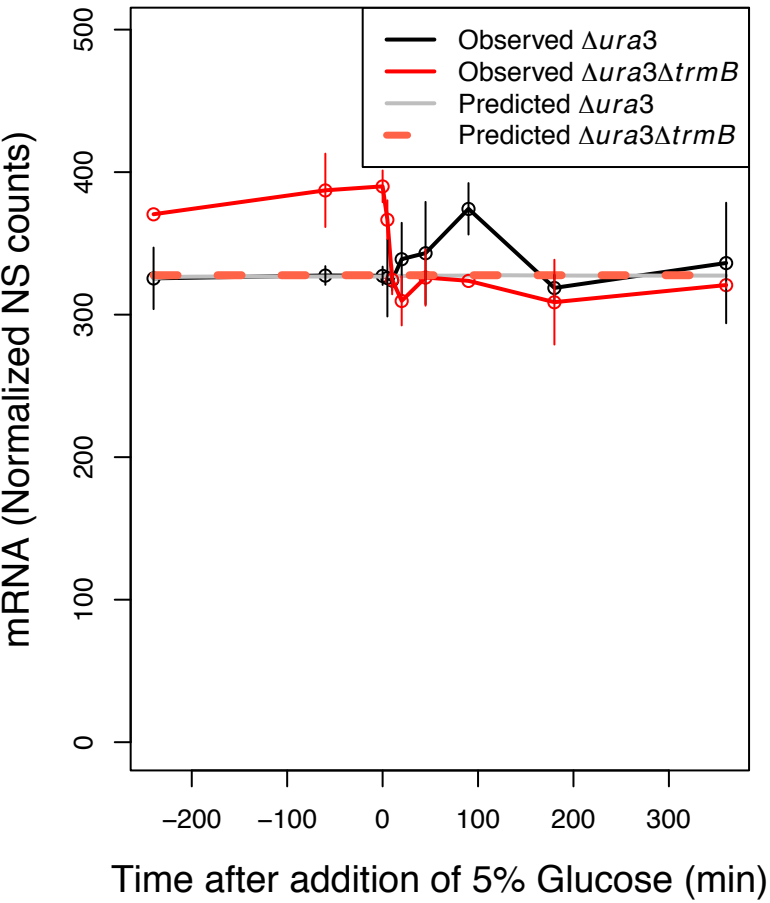

*pgk*

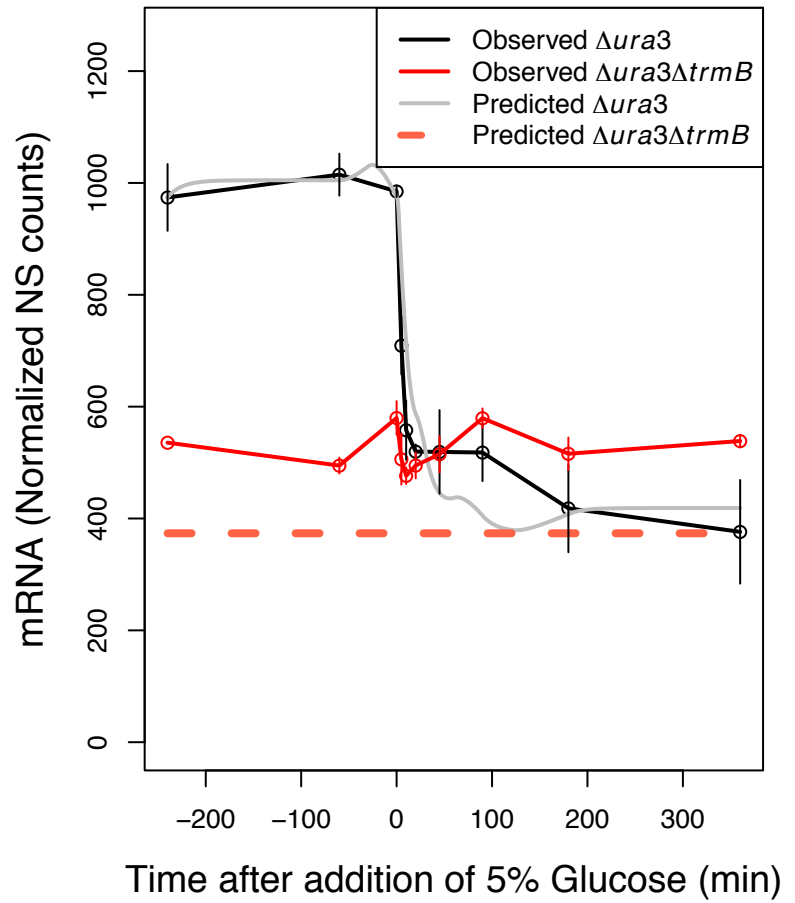

*porB*

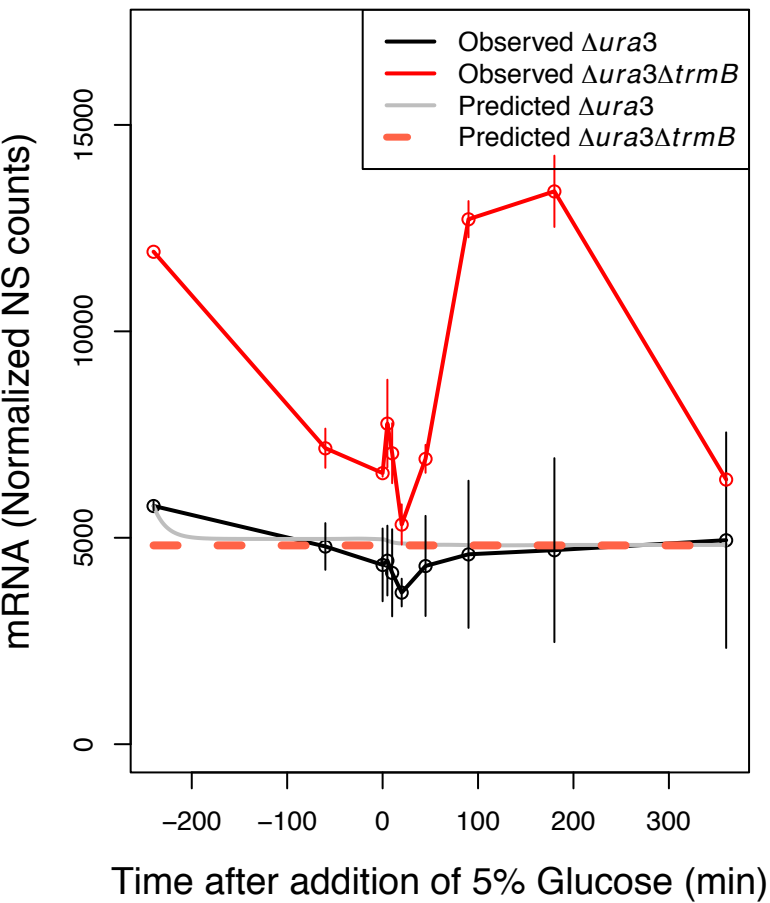

*ppsA*

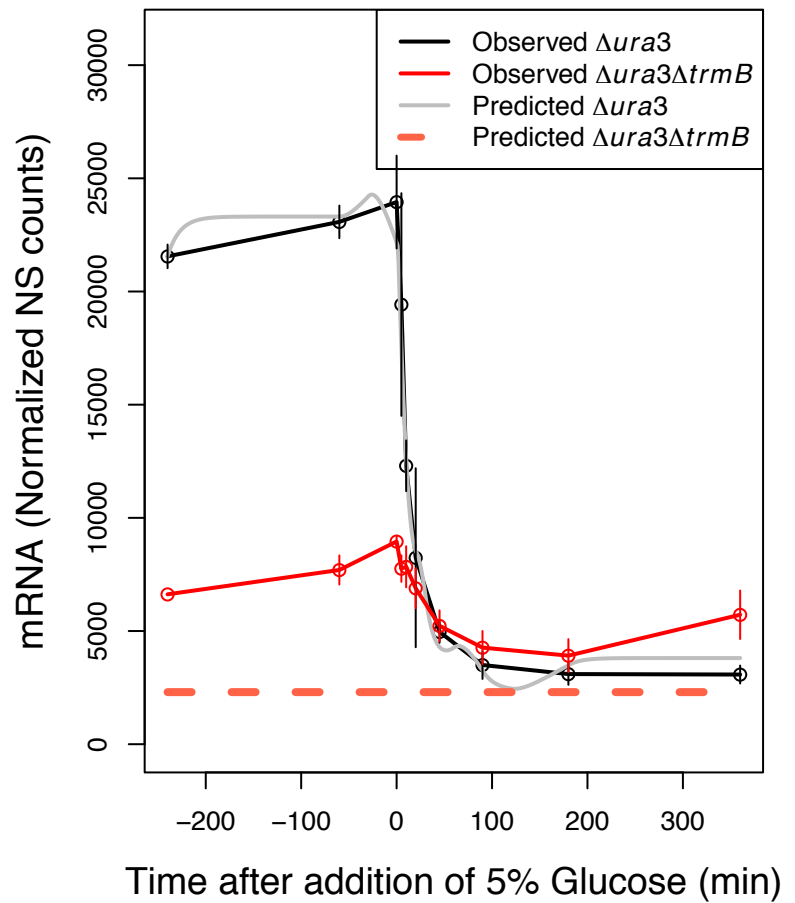



### *prsa*

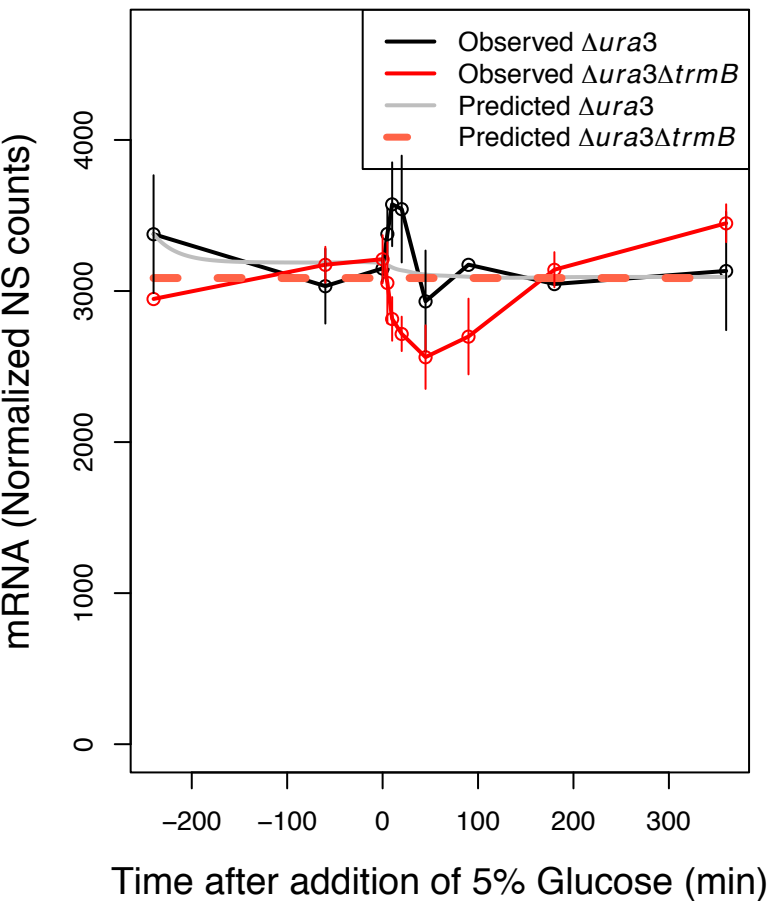

### *psc*

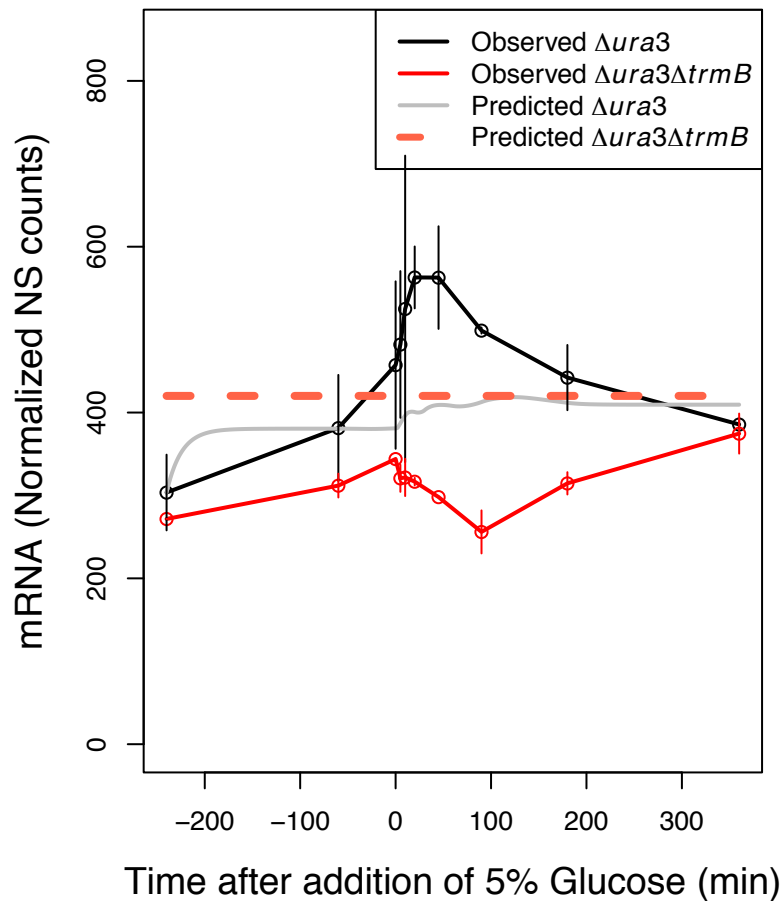

### *purB*

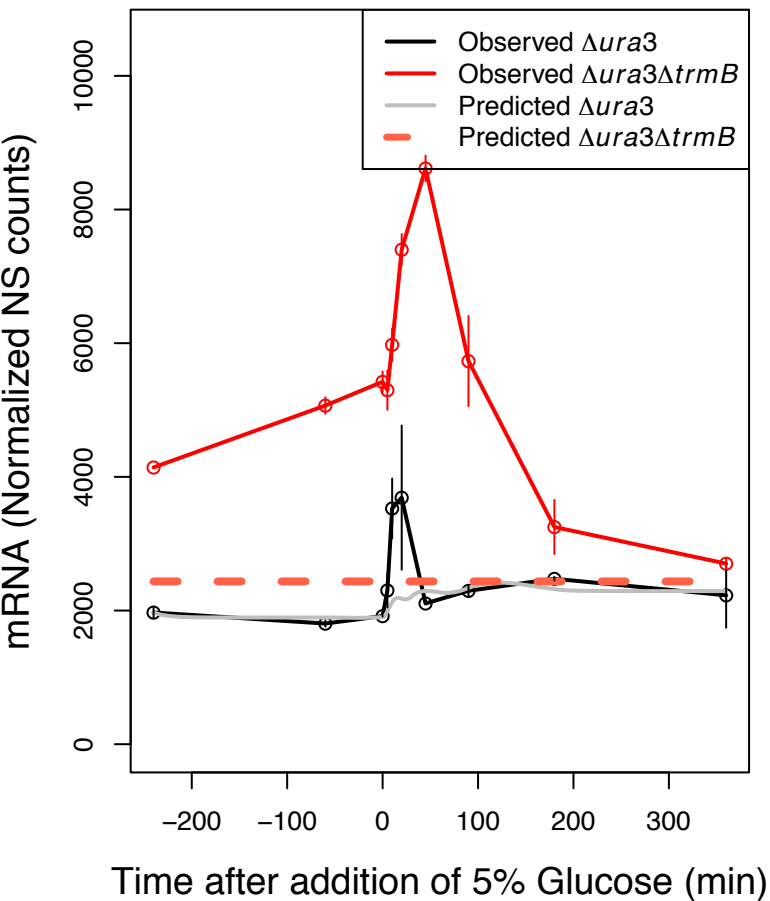

### *purC*

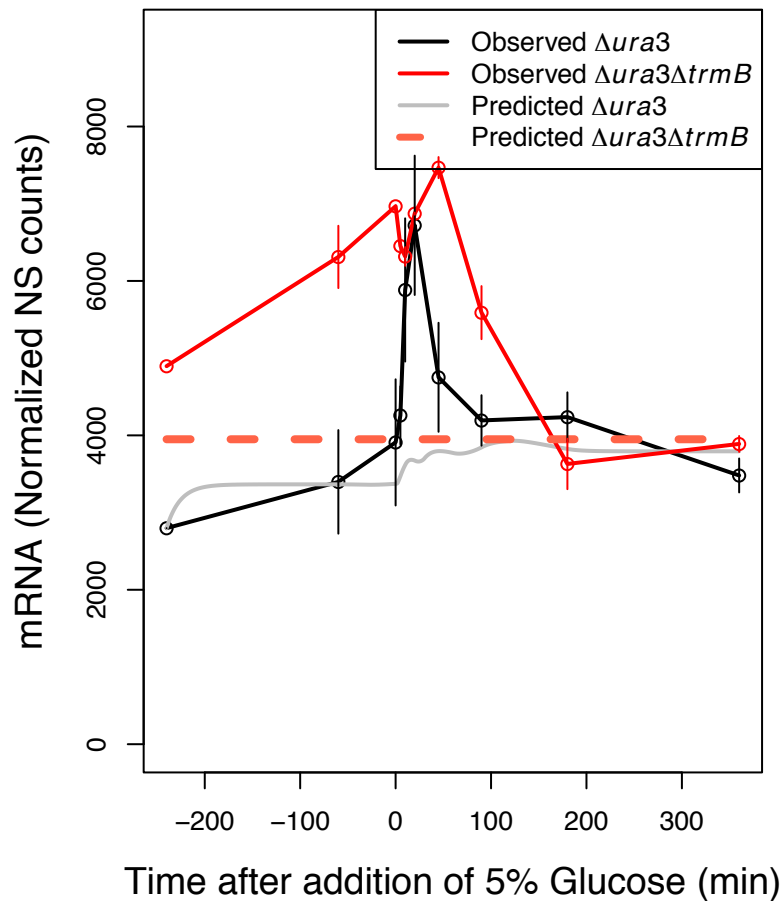

### *purD*

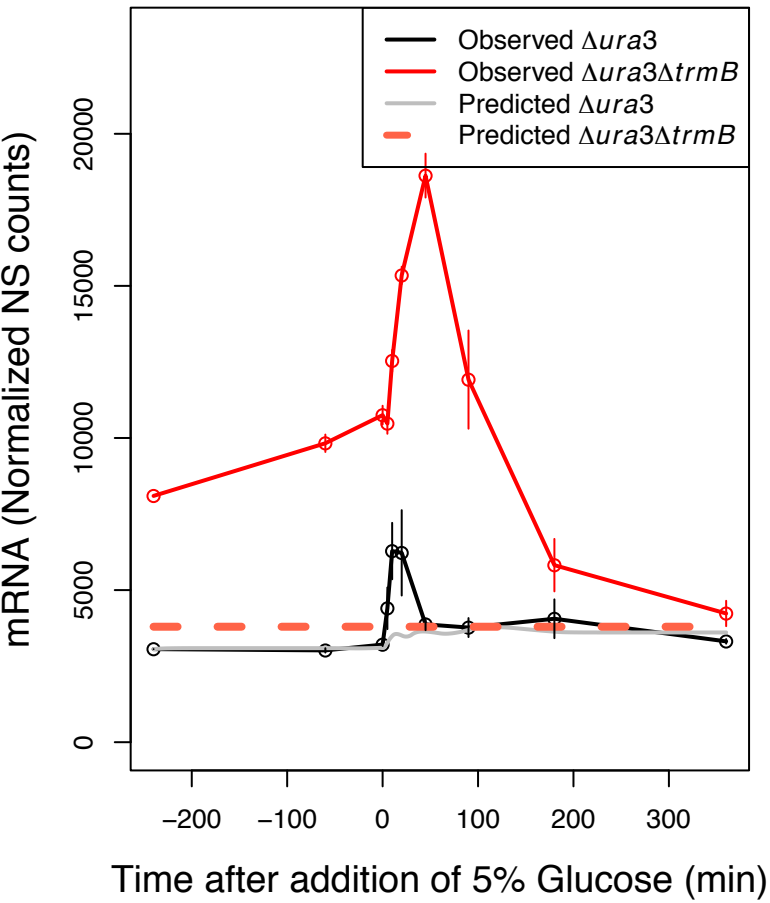

### *purE*

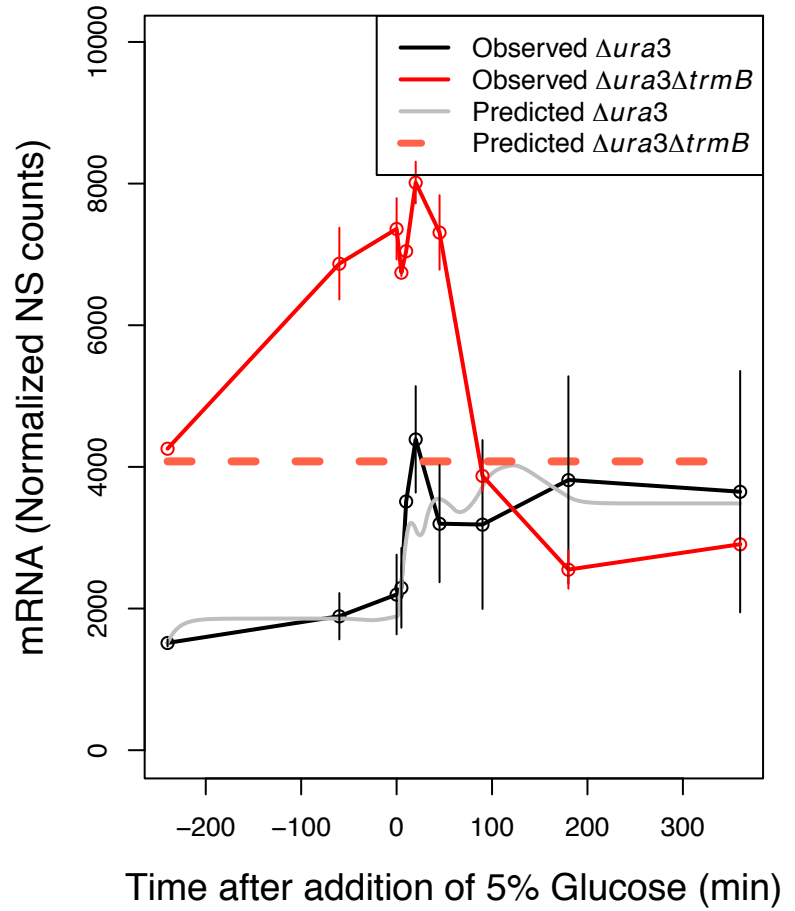

### *purF*

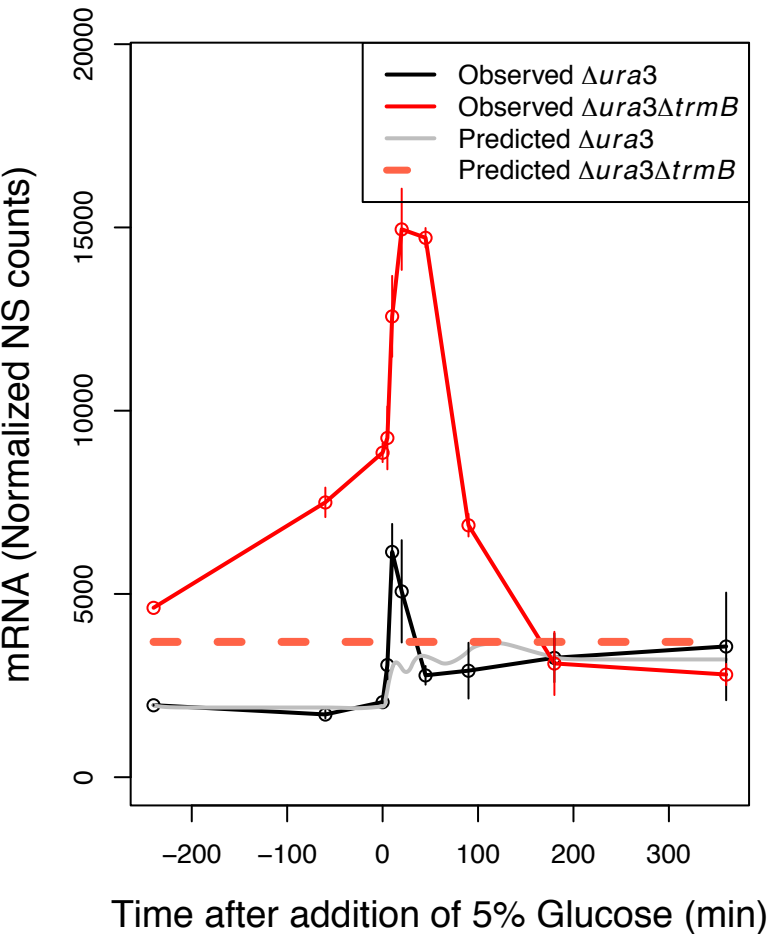

### *purH*

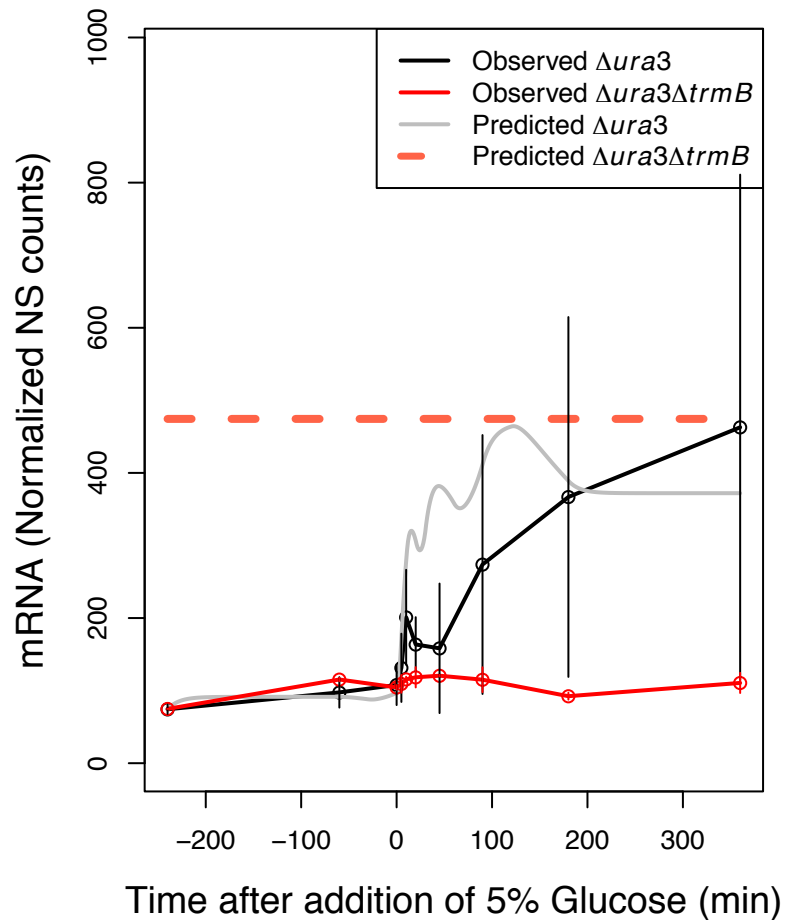

### *purK*

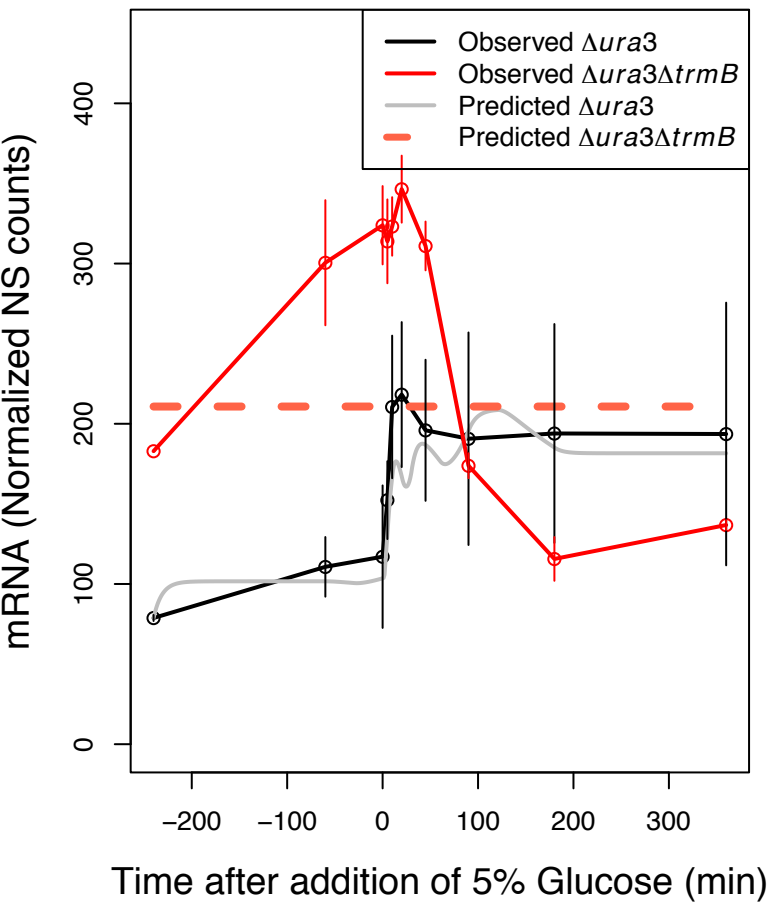

### *purL*

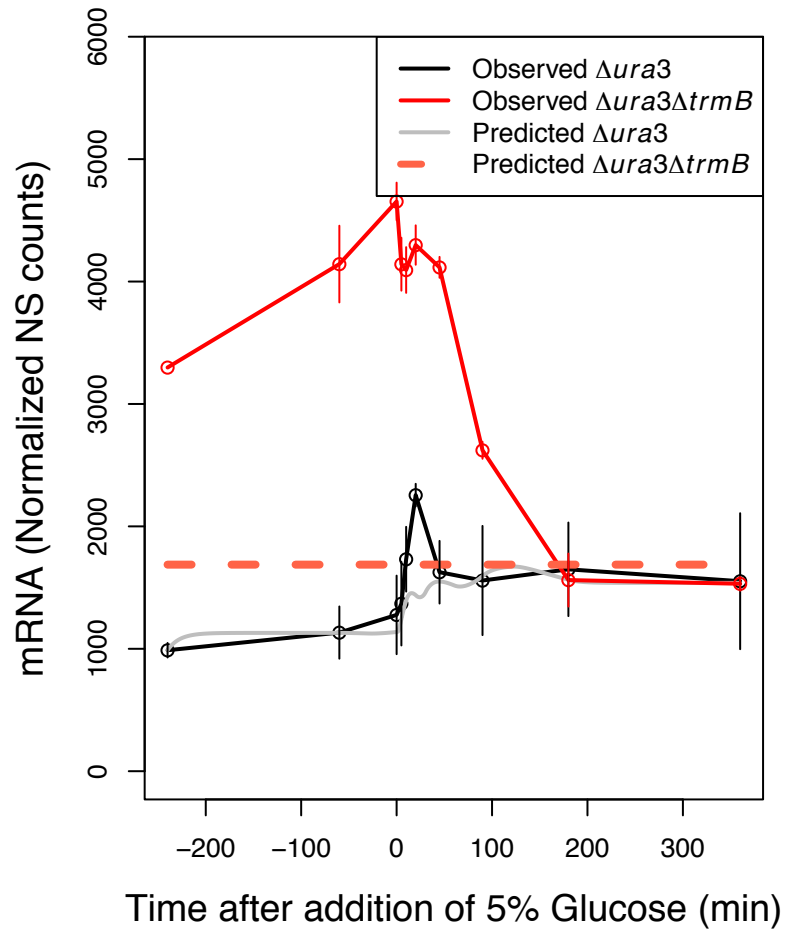

### *purL2*

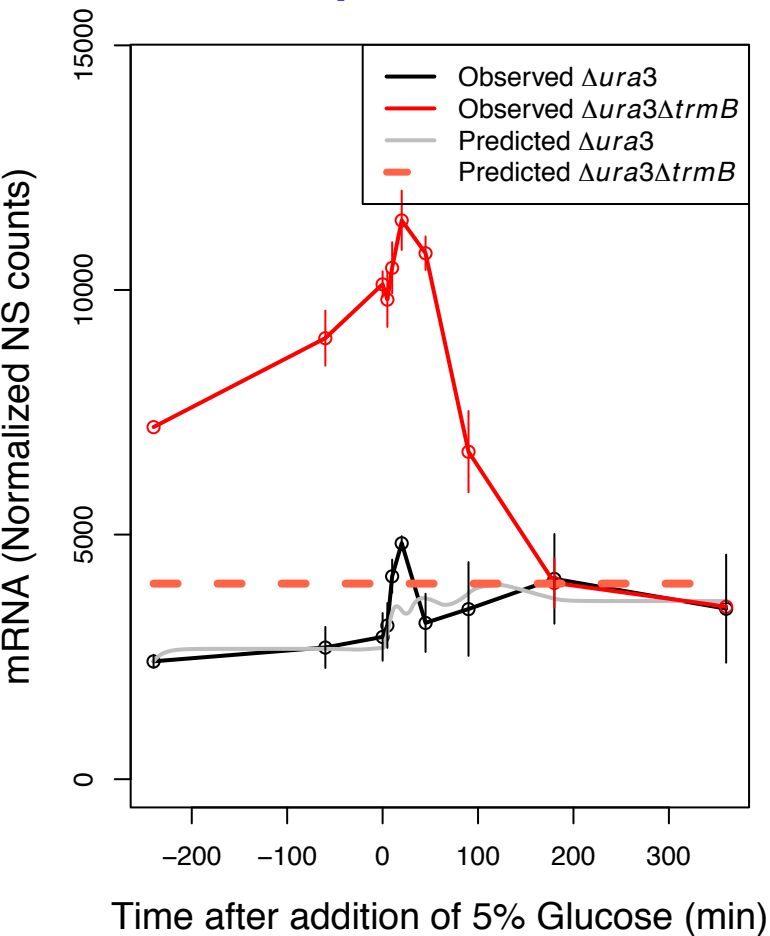

### *purM*

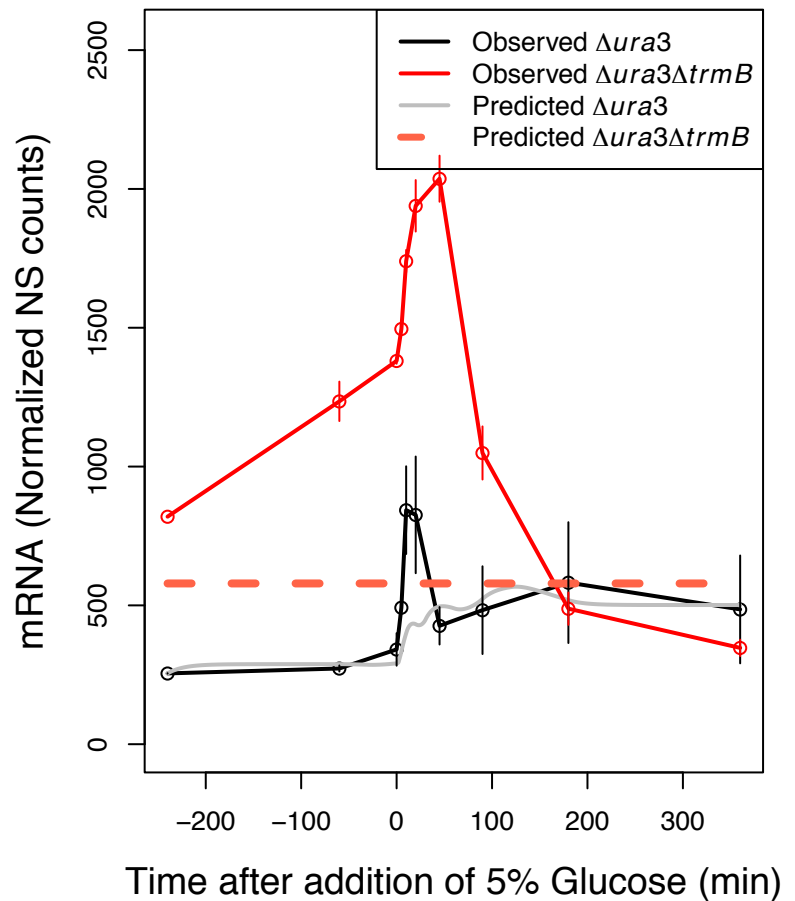

### *purU*

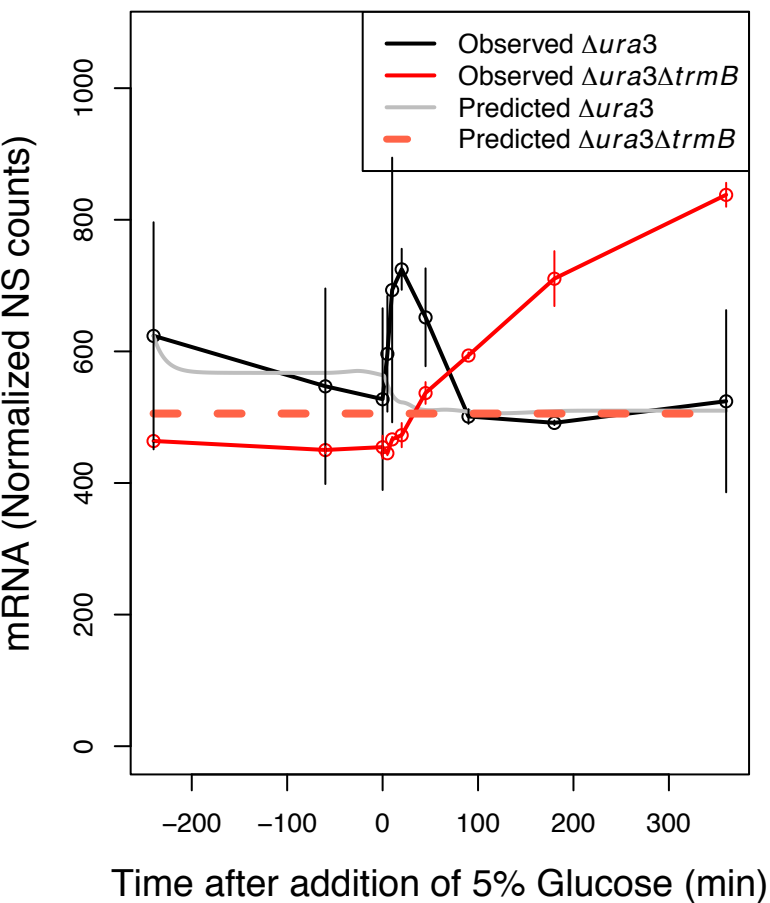

### *ykA*

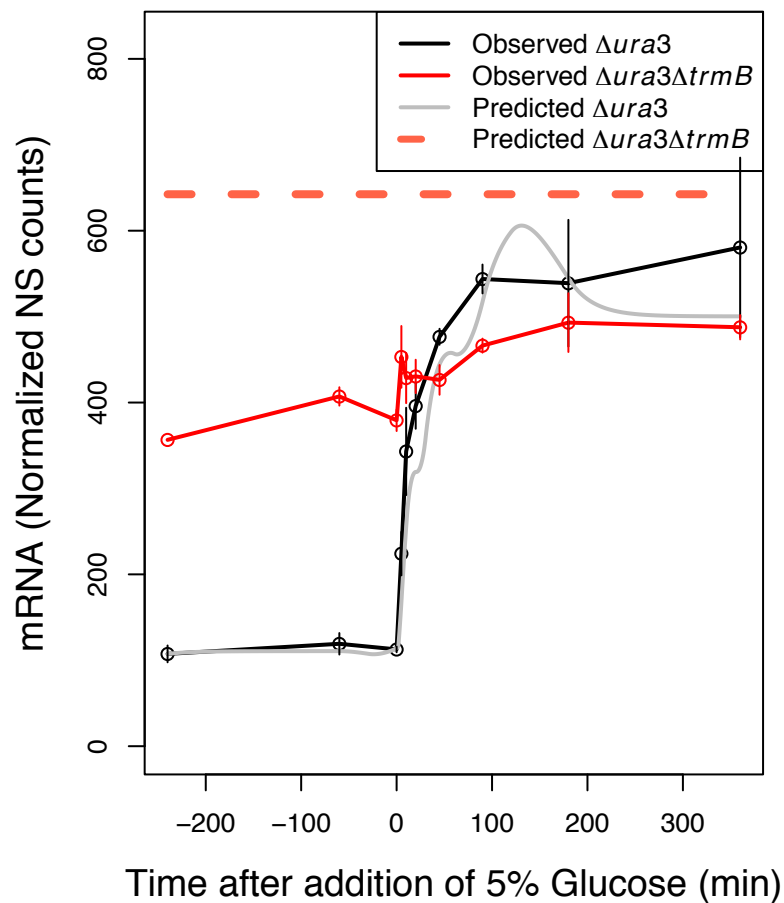

### *rbsA*

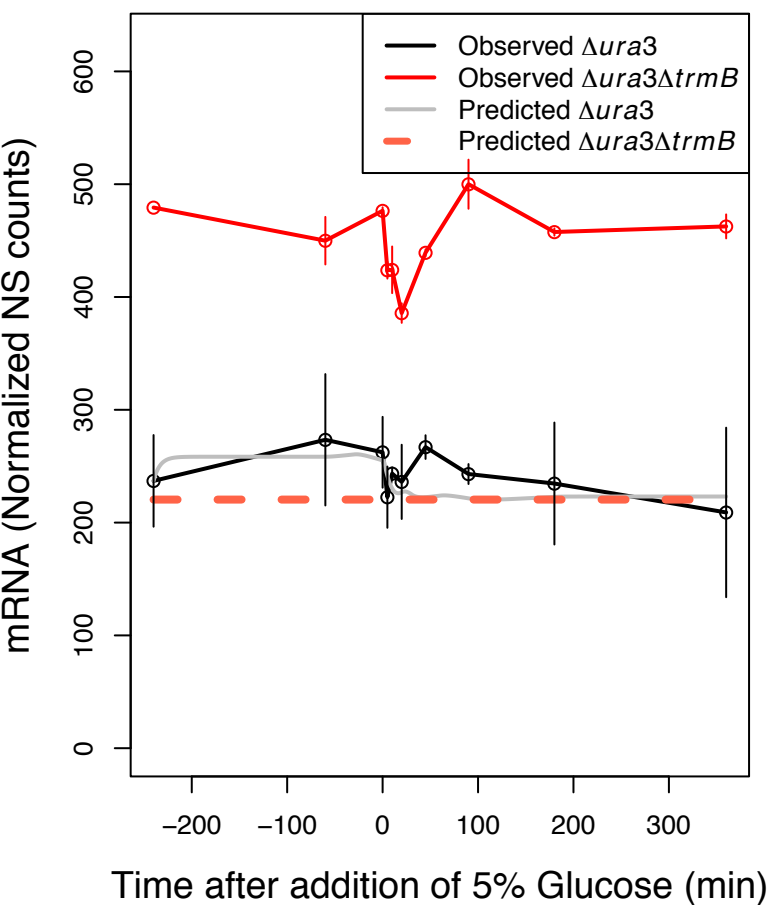

### *rpi*

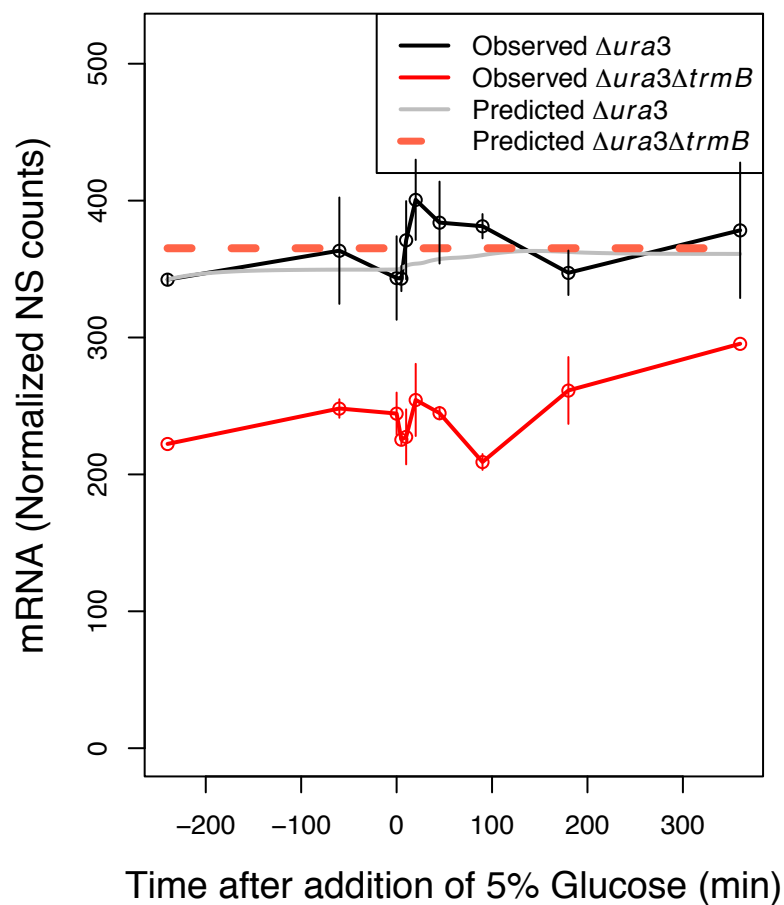

### *rspA*

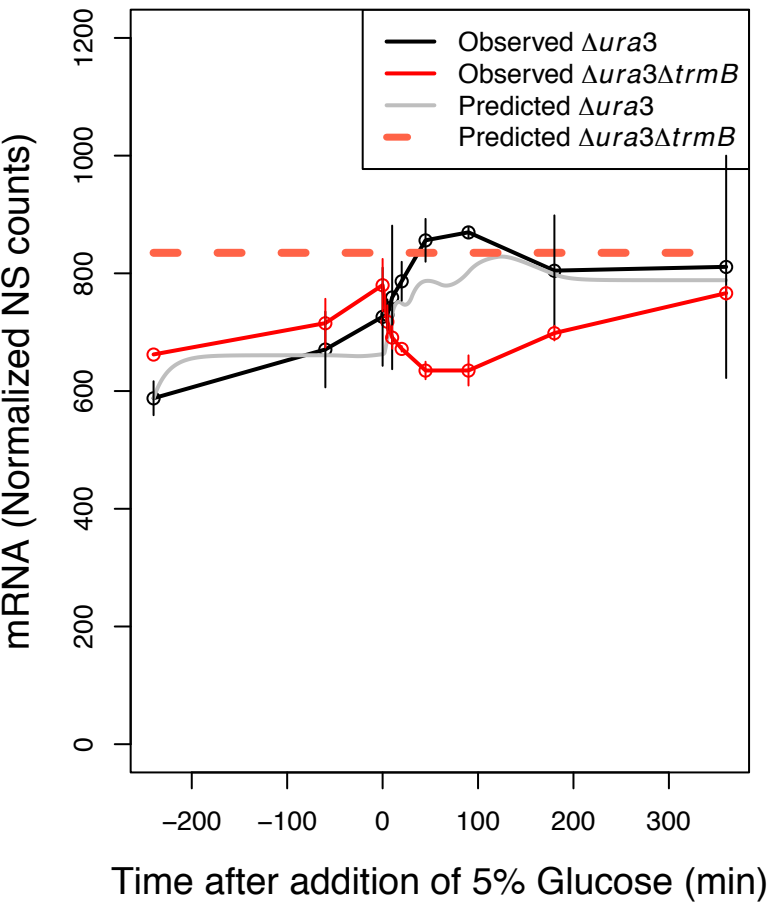

### *sdhA*

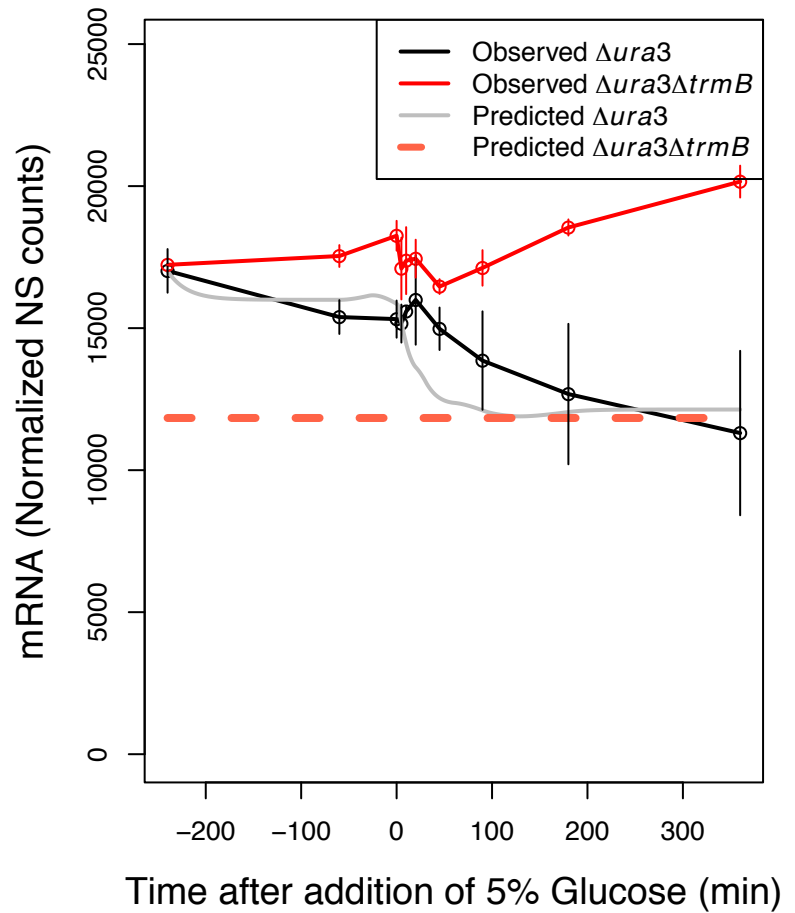

### *sdhB*

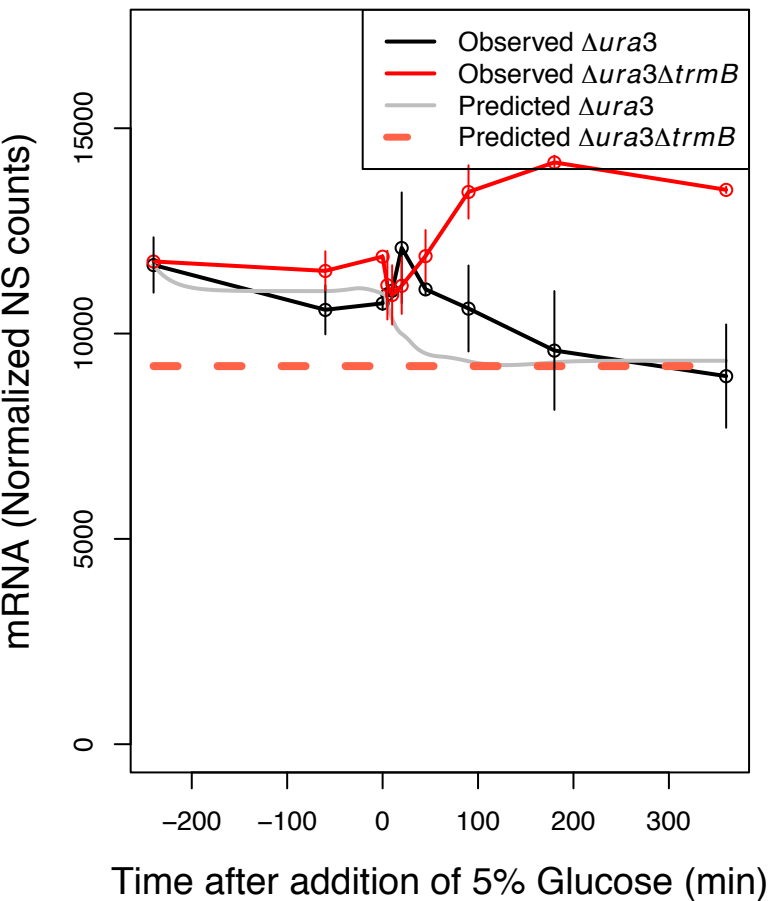

### *serA1*

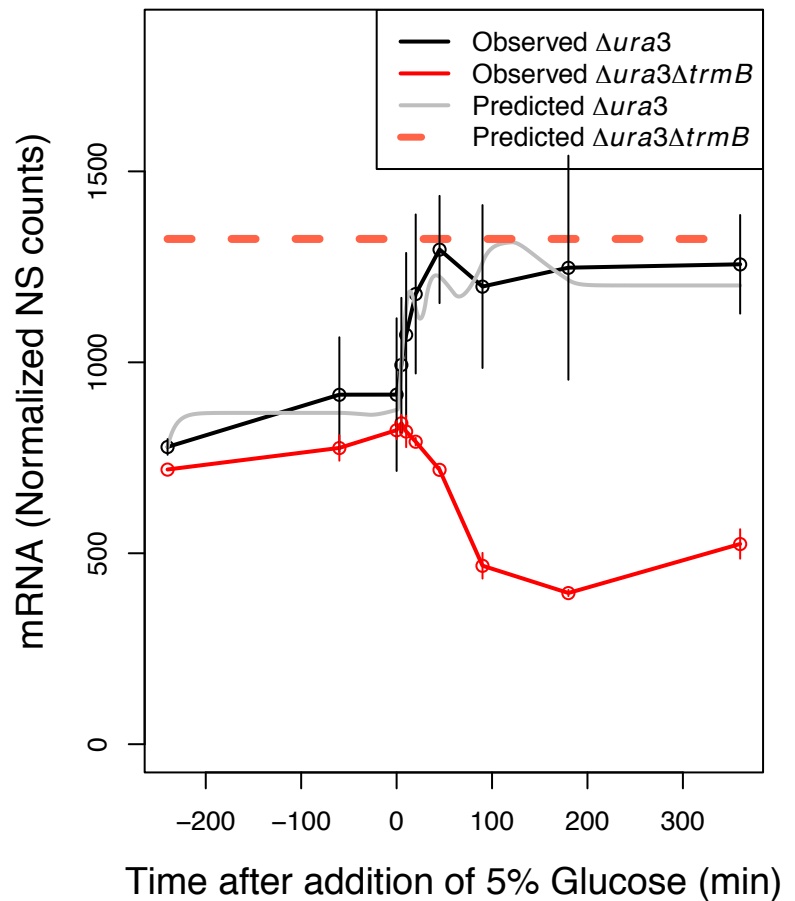

### *serA3*

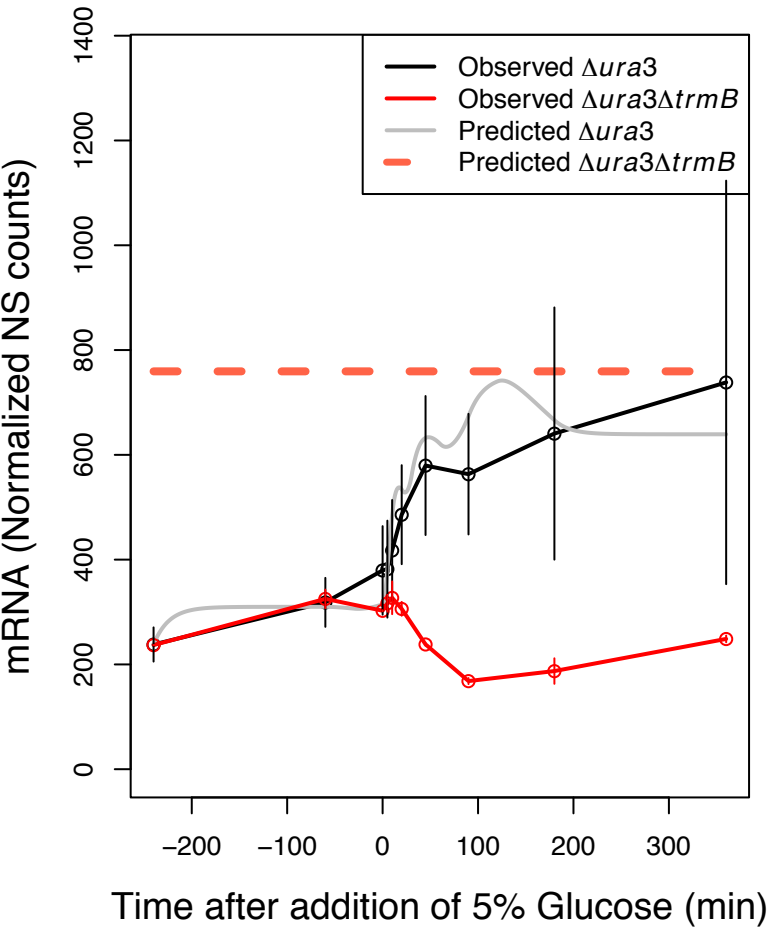

### *serB*

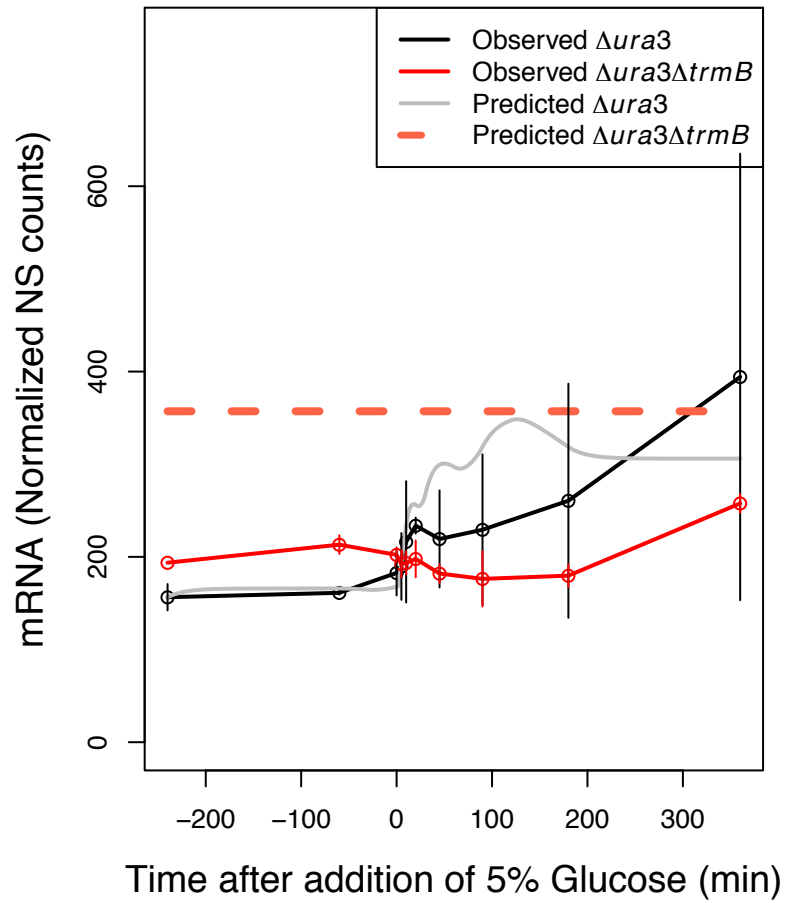

### *srp19*

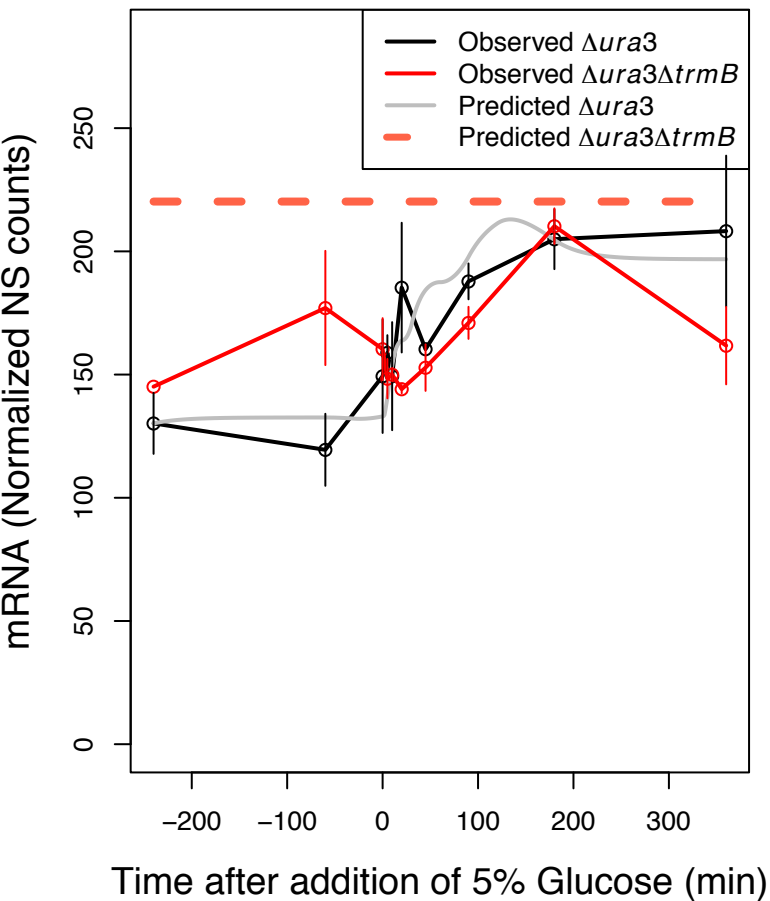

### *sucC*

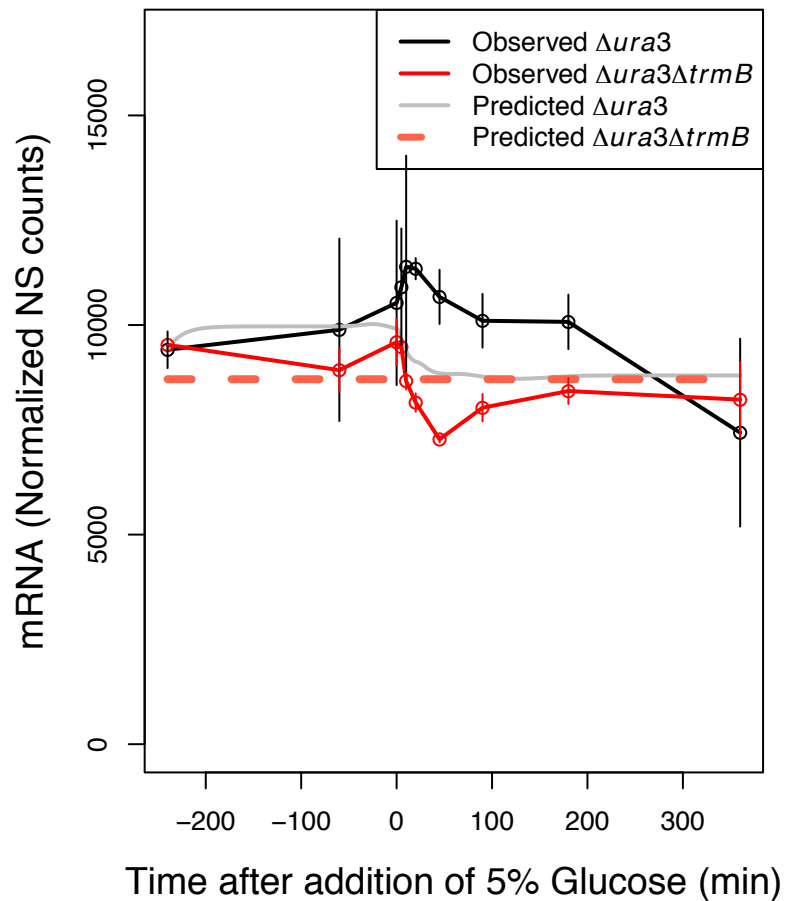

### *thiC*

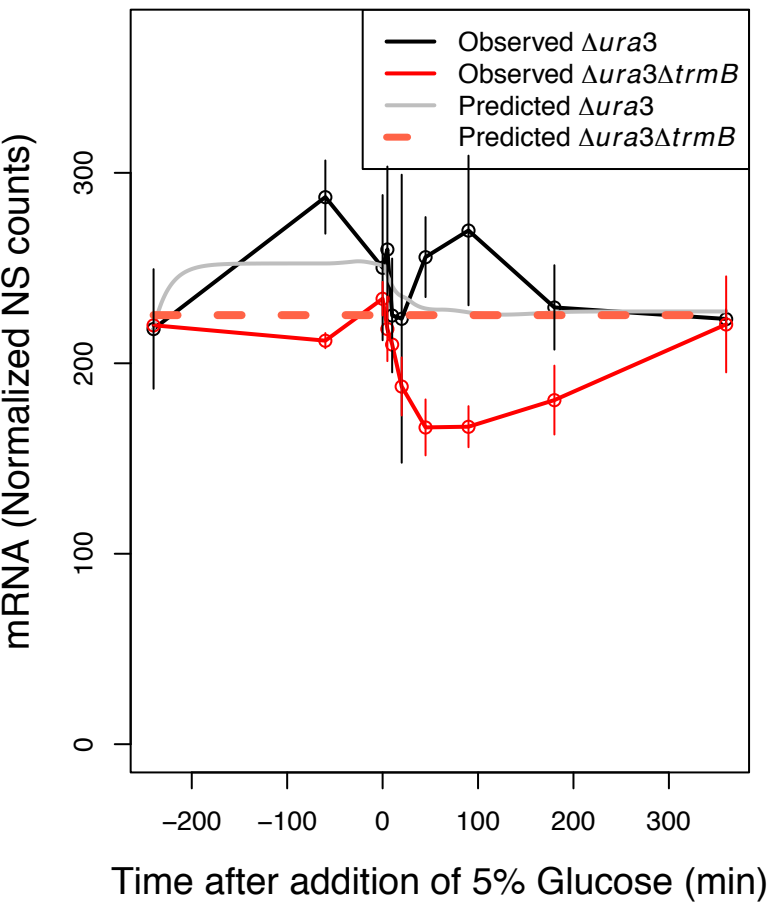

### *thiD*

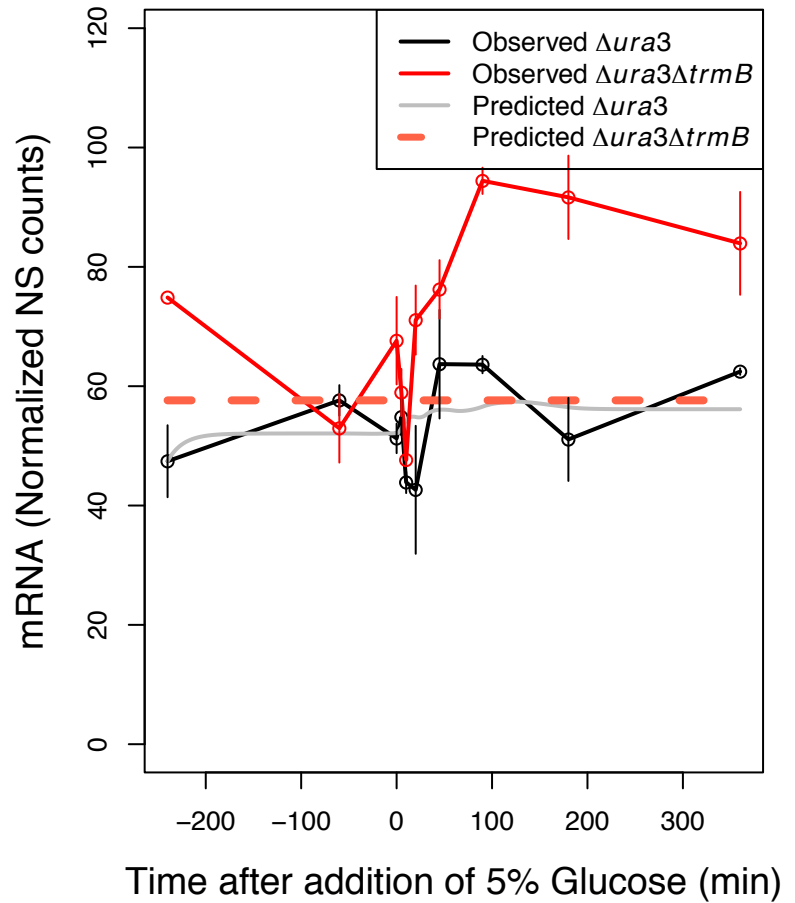

### *thrC2*

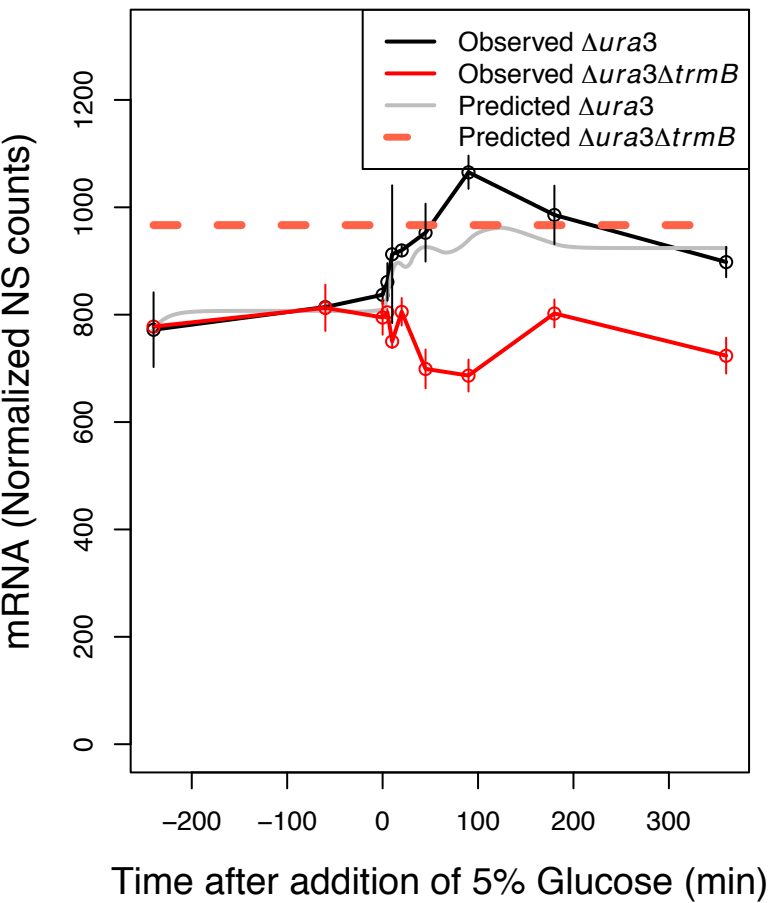

### *trpE2*

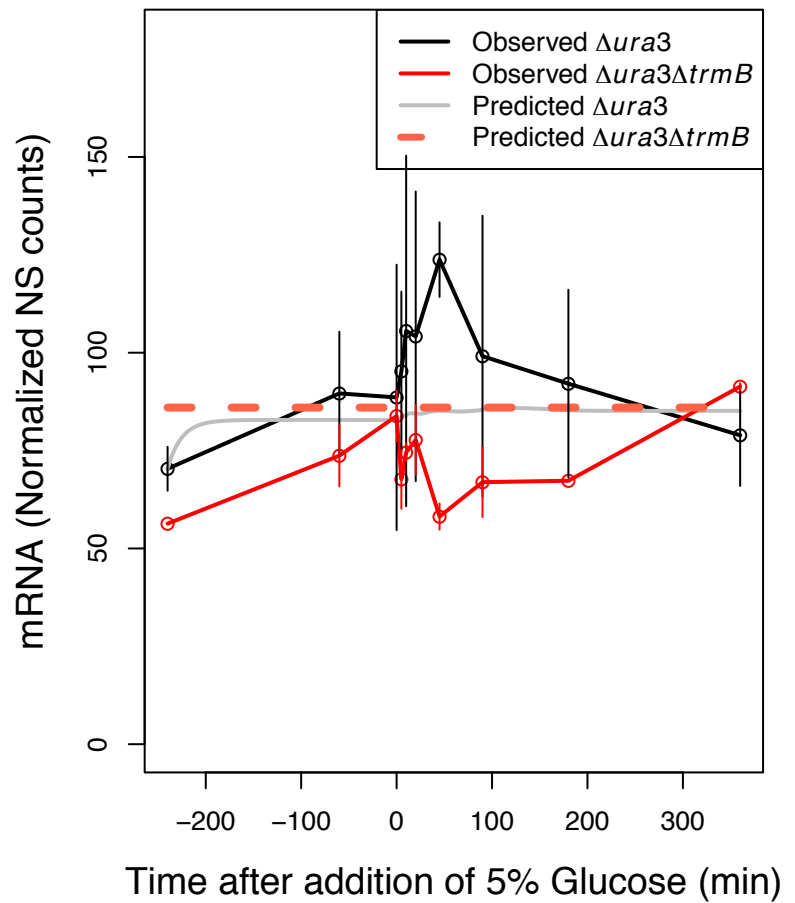

### *ush*

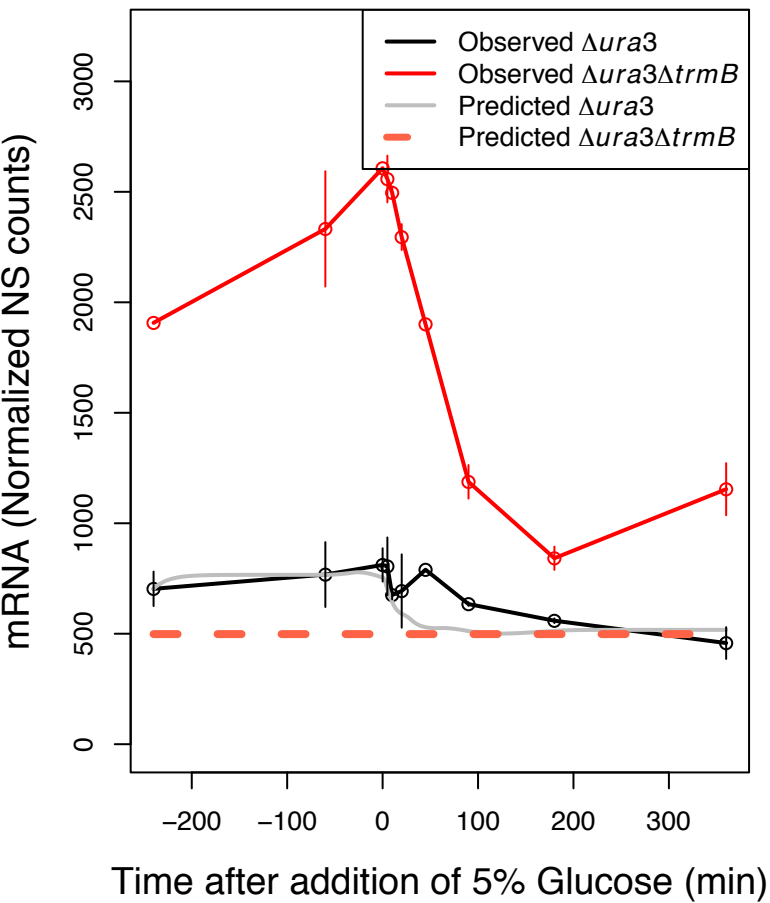

### *VNG0310C*

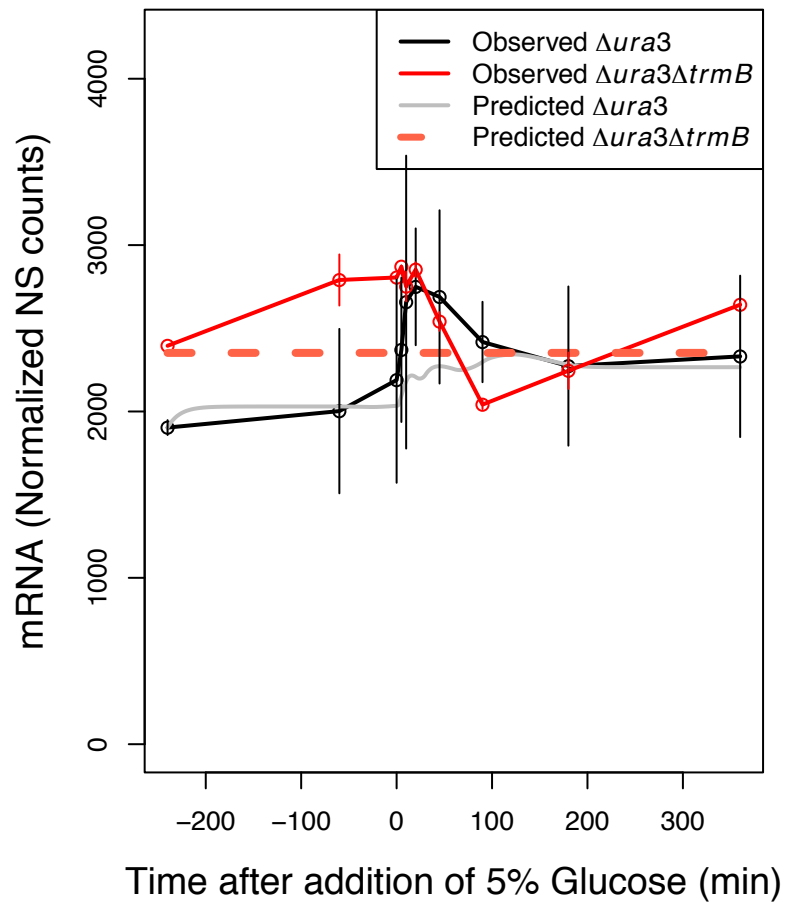

### *VNG0683C*

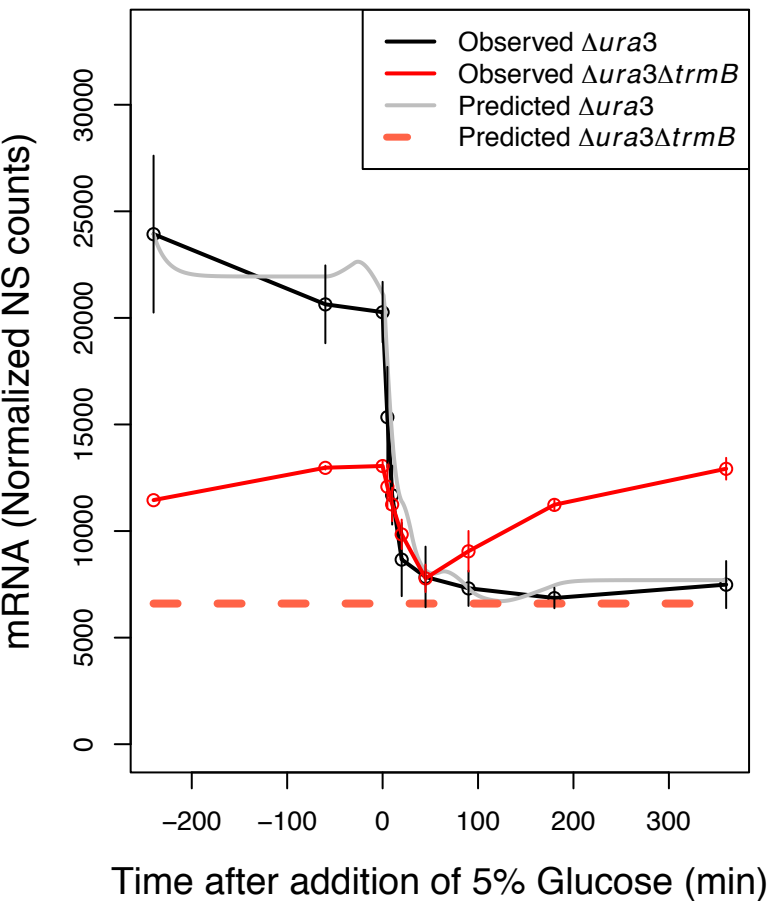

### *VNG1245C*

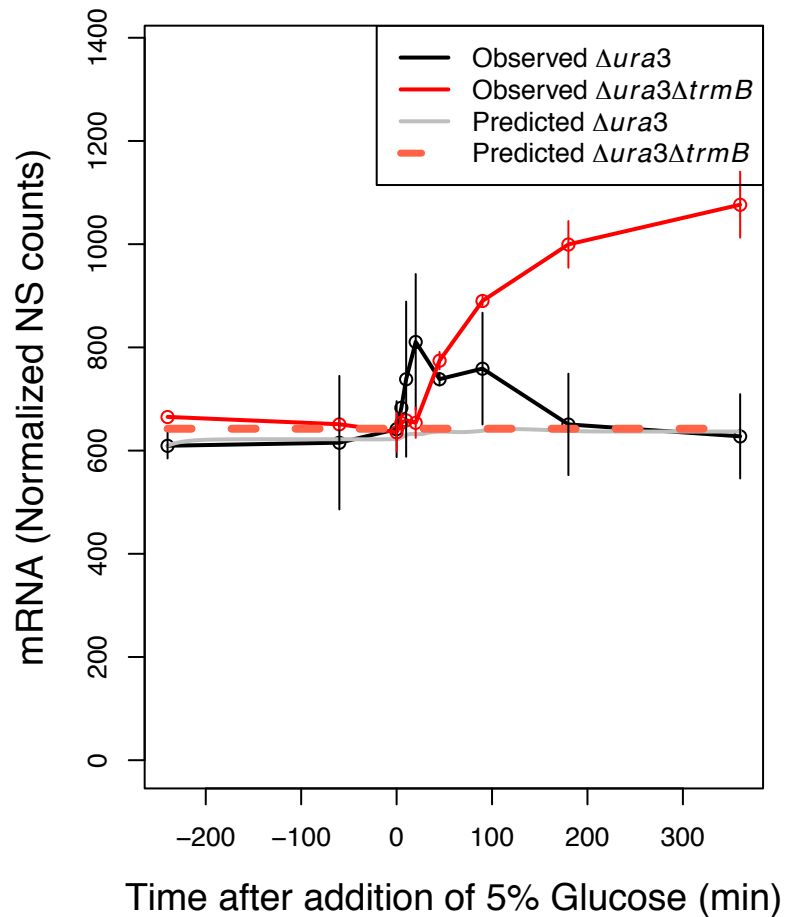



### VNG1451C

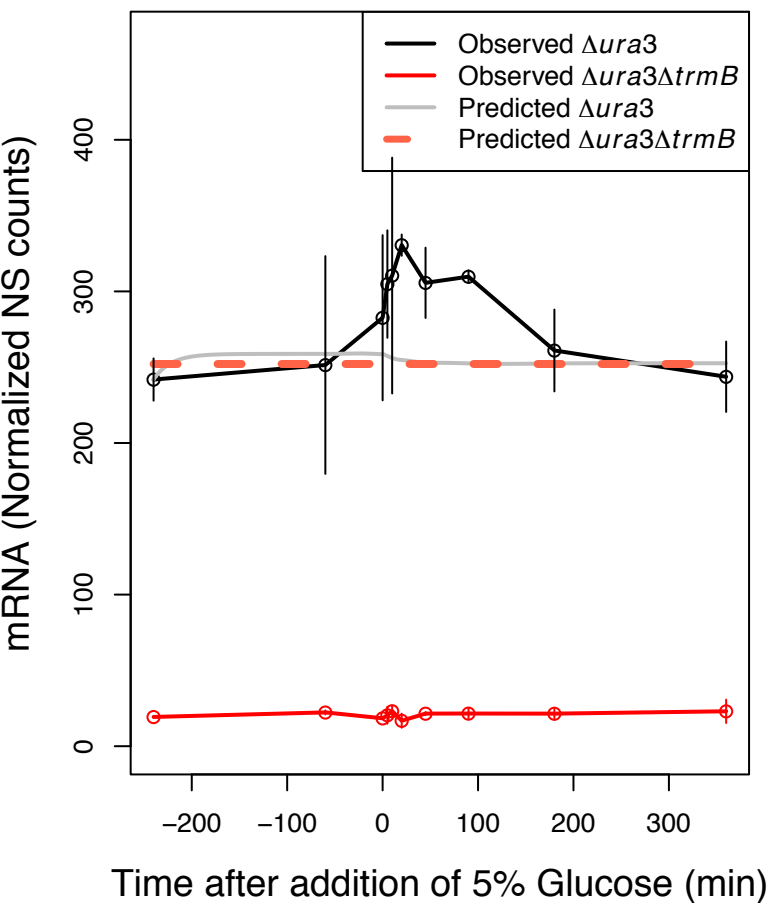

### VNG1670C

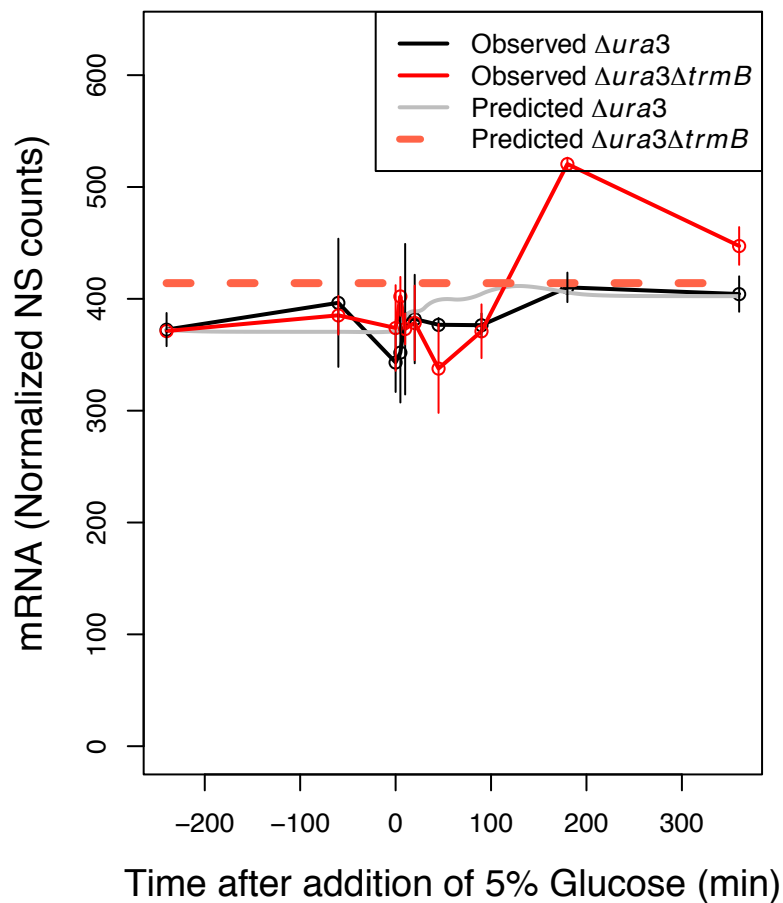

### VNG1775C

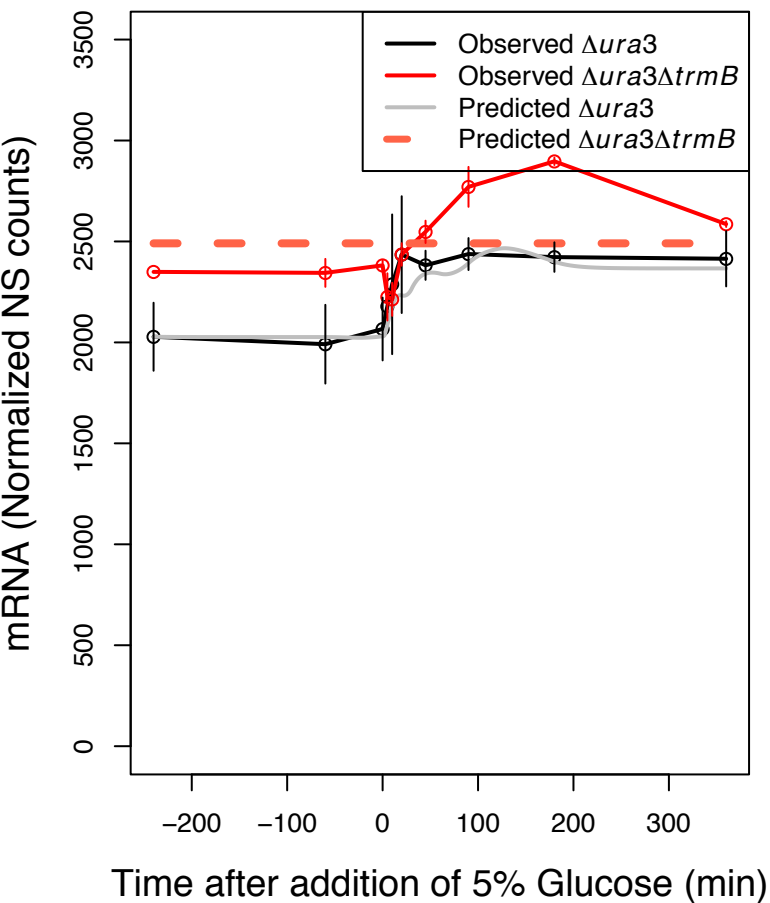

### VNG2371C

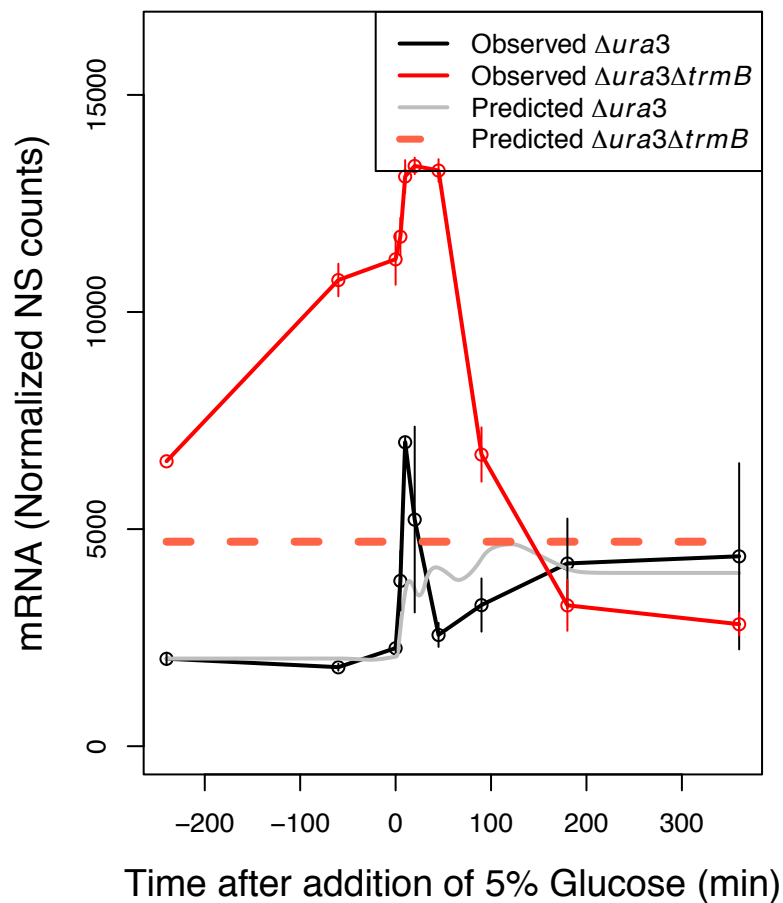

# yqeC

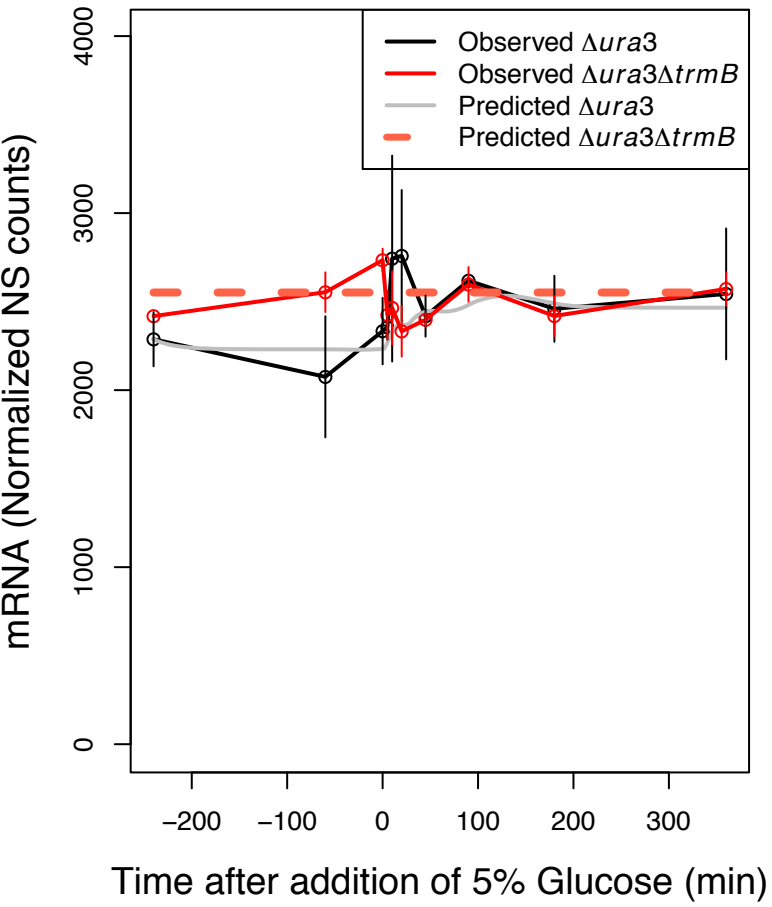

# ywfD

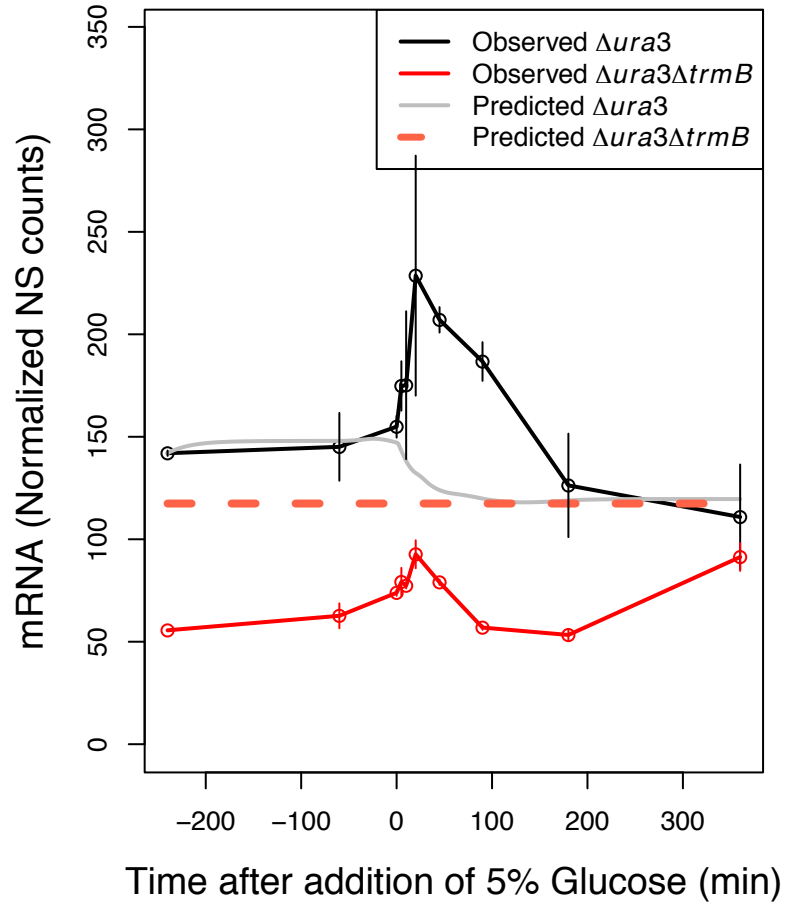

Supplement: supp_gkt659_Supplementary_Figure_1.3nar.pdf [file supp_gkt659_Supplementary_Figure_1.3nar.pdf]
